# Supplementary material
Source: publisher figshare collection journal article supplement (https://gsajournals.figshare.com/ndownloader/files/30688397)
Supplement: Supplementary file 1 [file 30688397]

## Sheet: Sheet1
Dataset S04. Output from hierarchical analysis from Figure 3. Gene description, cluster number within category, log2 fold change (FC), and adjusted p-value are shown for each gene along the treatments. Columns corresponding to Log2 FC values are highlighted according to a color scale; red (upregulation) to black (downregulation). Log2 FC values <-1 or >1 are in bold. Adjusted p-values <0.001 are …
Category	Gene ID	Gene description	Cluster #	Treatment
				At		At		At		At		At		Ls		Ls		At		At		At		Ls		Ls
				High		High		Low		High		High		High		High		Low		Low		Low		High		High
				O157:H7		STm 14028s		STm 14028s		STm 14028s		O157:H7		STm 14028s		O157:H7		O157:H7		O157:H7		STm 14028s		STm 14028s		O157:H7
				4 HPI		4 HPI		24 HPI		24 HPI		24 HPI		4 HPI		4 HPI		24 HPI		4 HPI		4 HPI		24 HPI		24 HPI
				Log2 FC	Adj. p-value	Log2 FC	Adj. p-value	Log2 FC	Adj. p-value	Log2 FC	Adj. p-value	Log2 FC	Adj. p-value	Log2 FC	Adj. p-value	Log2 FC	Adj. p-value	Log2 FC	Adj. p-value	Log2 FC	Adj. p-value	Log2 FC	Adj. p-value	Log2 FC	Adj. p-value	Log2 FC	Adj. p-value
Photosynthesis	AT4G18360	Encodes a glycolate oxidase that modulates reactive oxygen species-mediated signal transduction during nonhost resistance.	5	1.23502	0.250543	-0.142554	0.92773	3.23225	0.00347415	5.94959	0.00121624	5.80489	0.00171893	-0.452741	0.159843	-0.511216	0.131237	2.20735	0.446258	1.99616	0.513239	4.05167	0.001195	2.01944	0.000116439	1.82399	0.000669288
	AT2G45290	Transketolase;(source:Araport11)	4	3.12278	1.7369e-07	3.79354	3.42595e-08	0.364642	0.583794	2.34913	8.30831e-08	1.51412	3.0557e-06	0.865541	0.00119215	0.697364	0.00976712	0.0711723	0.934942	1.65951	0.00177907	1.32773	0.0190659	0.817791	0.00148261	-0.0542036	0.852597
	AT2G01140	Aldolase superfamily protein;(source:Araport11)	4	0.693886	0.162809	0.773127	0.107834	1.0011	0.000164723	0.982001	0.0743865	0.902319	0.10801	0.936903	0.000358041	0.326878	0.189772	-0.432412	0.0828026	-0.332609	0.139644	0.000596306	0.998785	1.40077	1.93338e-06	0.928656	0.000459654
	AT4G22260	Similar to mitochondrial alternative oxidase. im mutants have a variegated phenotype and fail to differentiate chloroplasts in the majority of their cells under high light intensity continuous illumination. The white tissues of immutans accumulate phytoene, a non-colored C40 carotenoid intermediate. This suggests that immutans controls, either directly or indirectly, the activity of phytoene desa…	4	0.14867	0.60872	0.231683	0.395428	1.0182	0.000990229	0.693796	0.00955536	0.634613	0.0190097	-0.356232	0.246127	-0.515669	0.111094	0.650871	0.0389984	-0.119473	0.633885	-0.512956	0.0674028	0.3372	0.227911	-0.0378371	0.916678
	AT3G14130	Aldolase-type TIM barrel family protein;(source:Araport11)	4	-0.591064	0.00684587	-0.255105	0.219296	1.07839	0.00347415	2.27033	3.59714e-08	2.15705	8.32178e-08	-0.543506	0.0549238	-0.355787	0.240423	0.38356	0.353631	-0.859638	0.0115263	-1.22083	0.00530623	0.957567	0.00161573	0.527294	0.0841282
	ATCG00600	Cytochrome b6-f complex, subunit V. Disruption of homologous gene in Chlamydomonas results in disruption of cytochrome b6-f complex.	4	0.328451	0.696423	0.585868	0.459164	-1.37843	0.00192921	-0.331818	0.628937	-0.235869	0.752388	0.265299	0.604312	-0.294234	0.618492	2.30998	1.89484e-05	0.207752	0.57252	-1.48108	0.001195	0.650219	0.167125	0.773021	0.117371
	AT2G35120	Single hybrid motif superfamily protein;(source:Araport11)	2	-0.812944	0.001643	-0.582881	0.0157275	-0.368882	0.567545	-0.482151	0.0681594	-0.374113	0.175607	1.96656	1.62442e-06	0.729944	0.0241231	-0.334532	0.644311	1.25271	0.0762132	0.878876	0.297237	1.46896	6.13387e-05	0.790879	0.0213952
	AT1G45474	Encodes a component of the light harvesting complex of photosystem I.	2	-2.34135	0.000536122	-1.79465	0.00512423	-1.61085	5.26219e-06	-2.12422	0.0054813	-1.73323	0.0266448	0.782352	0.135062	0.0487573	0.946972	-1.03848	0.000562018	-0.934644	0.00106918	-0.350352	0.217544	2.03993	0.0283566	0.645614	0.592131
	ATCG00350	Encodes psaA protein comprising the reaction center for photosystem I along with psaB protein; hydrophobic protein encoded by the chloroplast genome.	2	-0.379626	0.842267	-0.144753	0.941526	-0.25207	0.476774	0.80321	0.613751	0.272416	0.869065	-0.382143	0.350017	-0.0427669	0.933013	-1.64964	0.00016787	-2.2713	1.83029e-06	-0.480449	0.216636	0.0739624	0.862118	-0.352888	0.429074
	ATCG00300	encodes PsbZ, which is a subunit of photosystem II. In Chlamydomonas, this protein has been shown to be essential in the interaction between PS II and the light harvesting complex II.	2	-0.299412	0.887046	-0.159708	0.940611	-0.875032	0.000342399	-0.104272	0.955785	0.219677	0.911532	0.268551	0.44348	-0.253783	0.522698	-1.51295	4.57149e-06	-1.62122	5.77314e-07	0.232159	0.366301	-0.770056	0.0329315	-0.630043	0.0862097
	ATCG00730	A chloroplast gene encoding subunit IV of the cytochrome b6/f complex	2	-0.283034	0.838369	-0.306355	0.818902	-0.667924	0.00153386	-0.0420699	0.973646	-0.184632	0.885999	-0.961197	0.00209234	-0.461028	0.0988175	-0.953624	0.000174584	-1.11815	1.25541e-05	-0.110647	0.647443	-1.34907	0.000240727	-1.08729	0.00176454
	AT3G15840	Encodes a chloroplast-targeted protein localized in the stroma that is a novel component essential for NDH-mediated non-photochemical reduction of the plastoquinone pool in chlororespiratory electron transport.	2	-1.14167	0.373728	-1.38164	0.252022	-0.0928523	0.724298	-0.41524	0.727712	-0.211651	0.871608	-2.60788	2.80801e-08	-1.66887	1.40546e-05	-0.403709	0.119935	-0.407479	0.0938744	-0.203363	0.474968	-1.70116	3.09698e-06	-0.58634	0.0540676
	AT1G68830	STN7 protein kinase; required for state transitions, phosphorylation of the major antenna complex (LHCII) between PSII and PSI, and light adaptation. STN7 is involved in state transitions.	2	-0.10858	0.906641	-0.500824	0.518308	-0.385086	0.0810896	-0.102545	0.909743	0.102621	0.915161	-2.08133	4.14923e-08	-1.72748	1.23461e-06	0.582008	0.0200181	-0.347395	0.12631	-0.0667481	0.823932	-1.27873	8.46726e-06	-0.665391	0.00895409
	AT2G45630	Hydroxyphenylpyruvate reductase (HPPR) family member with low activity.	2	-0.79165	0.107572	-0.461229	0.352638	0.0900781	0.82994	0.0475887	0.931277	0.0921786	0.873843	-2.12135	7.7163e-05	-0.823587	0.0227112	-0.386968	0.375518	-0.960339	0.0272114	-0.378812	0.429819	-0.867462	0.00516366	-0.862849	0.00830773
	AT1G12550	Encodes a hydroxypyruvate reductase that reduces HP to glycerate and shows even more activity with glyoxylate, a more upstream intermediate of the photorespiratory cycle. It is likely targeted to the chloroplast where it could provide a compensatory bypass for the reduction of HP and glyoxylate within this compartment. Together with HPPR2 and TAT1 involved in the biosynthesis of pHPL from tyrosin…	2	-0.994652	0.00548047	-1.16443	0.00165676	0.417101	0.436614	-2.24099	2.52554e-06	-1.21229	0.00129011	-0.914048	0.00695859	-0.536131	0.114732	0.735622	0.181355	0.288213	0.538066	-1.02407	0.123326	0.0163608	0.96018	0.243345	0.469668
	AT1G70580	Encodes a protein with glyoxylate aminotransferase activity. It can act on a number of different small substrates and amino acids in vitro.	2	-2.12077	0.000420233	-1.6864	0.00313778	-0.378206	0.171734	-2.15794	0.0105528	-1.42306	0.107907	-1.20075	4.26078e-06	-1.30591	4.66252e-06	0.30371	0.321187	-0.707266	0.0176364	-0.204504	0.551501	-0.407291	0.0374308	-0.329878	0.115852
	AT1G03130	Encodes a protein predicted by sequence similarity with spinach PsaD to be photosystem I reaction center subunit II (PsaD2)	2	-1.80147	0.399862	-1.80838	0.382198	-1.49776	0.000568544	-1.58891	0.459475	-1.23276	0.58752	-1.02036	0.000922668	-1.17527	0.00046319	0.0224405	0.96587	-0.270007	0.530754	0.00126422	0.998785	-0.861882	0.00287086	-0.759286	0.01183
	AT3G17670	tetratricopeptide repeat (TPR)-containing protein;(source:Araport11)	2	-1.07641	0.00205385	-0.960974	0.0042152	-1.318	0.0194176	-1.30281	0.000645762	-1.43545	0.000317905	-0.385013	0.198367	-0.530215	0.0949759	-0.541069	0.291212	-0.780706	0.115035	-0.232373	0.696605	-0.130876	0.655732	0.553093	0.0688883
	AT4G04640	One of two genes (with ATPC2) encoding the gamma subunit of Arabidopsis chloroplast ATP synthase.	2	-1.96322	0.212473	-1.25444	0.449977	-1.29511	1.95628e-05	-1.78869	0.277273	-1.45652	0.413194	-0.266901	0.117438	-0.00163193	0.993621	-1.1217	0.000255622	-0.232643	0.315626	0.280643	0.287772	-0.319982	0.0507435	-0.431135	0.0165632
	AT3G60750	Transketolase;(source:Araport11)	2	-1.59336	0.366711	-1.12841	0.53619	-1.22006	1.7793e-05	-1.66403	0.351432	-1.44788	0.436354	-0.310197	0.176199	-0.63403	0.011495	-1.37278	1.94959e-05	-0.504785	0.0188172	-0.0605352	0.826207	-1.10064	4.59207e-05	-0.411529	0.0916622
	AT3G09150	Required for biosynthesis of the tetrapyrrole phytochrome chromophore phytochromobilin. Encodes phytochromobilin synthase, a ferredoxin-dependent biliverdin reductase. It is necessary for coupling the expression of some nuclear genes to the functional state of the chloroplast.	2	-1.15784	0.0218512	-0.838236	0.0891889	-1.8219	0.000711485	-0.613948	0.173921	-0.268147	0.597709	0.0794937	0.75018	0.229218	0.3549	0.0434207	0.925975	0.873271	0.0273213	0.580049	0.205869	-1.54186	2.44467e-07	-0.477265	0.0351439
	AT4G37920	endoribonuclease E-like protein;(source:Araport11)	2	-1.18345	0.0450432	-0.750304	0.209149	-1.22937	0.000723399	-0.314685	0.587293	-0.371028	0.542124	0.514511	0.011661	0.402443	0.056884	-0.427199	0.186999	0.604764	0.035066	0.228213	0.507576	-2.23758	2.16065e-10	-0.633128	0.00353139
	AT1G15140	FAD/NAD(P)-binding oxidoreductase;(source:Araport11)	2	0.16918	0.582084	0.198562	0.489058	-0.961591	0.000127896	-0.753268	0.0141831	-0.652725	0.0380221	-0.213039	0.252584	-0.480742	0.0165368	-1.2355	3.97524e-05	-0.0393765	0.893122	-1.22508	0.001195	-0.147788	0.410201	-0.304052	0.111428
	AT3G04790	Ribose 5-phosphate isomerase, type A protein;(source:Araport11)	2	0.0331834	0.96093	-0.0250617	0.96852	-1.12093	3.76971e-05	-1.96126	0.00573097	-1.80158	0.0126549	-0.275829	0.249602	-0.336871	0.186702	-1.25982	3.897e-05	-0.0197736	0.941523	-0.766065	0.00726687	-0.241053	0.293971	-0.280066	0.26127
	AT1G80380	encodes a glycerate kinase which catalyzes the last step of photorespiration C2 cycle.	2	-0.0790337	0.913378	-0.0387265	0.95666	-1.30498	4.13071e-06	-1.81482	0.00371921	-1.82098	0.00438783	-1.15085	1.16085e-05	-0.80488	0.000934966	-1.06788	9.33046e-05	-0.413505	0.0470176	-0.149291	0.545024	-0.68737	0.00150614	-0.547206	0.0135322
	AT2G21170	Encodes a plastidic triose phosphate isomerase. Mutants with reduced pdTPI levels have difficulty transitioning from heterotrophic to autotrophic growth. The related phenotypes, such as chlorosis in light-grown seedlings may result from an accumulation of dihydroxyacetone phosphate (DHAP) and methylglyoxal (MG) in these mutants. Both splice variants appear to be expressed, but the At2g21170.2 var…	2	-0.831986	0.261543	-0.54949	0.467525	-1.05418	0.000164183	-1.37278	0.0693393	-1.14942	0.145515	-0.382305	0.0350524	-0.501975	0.0106868	-1.09197	0.00033325	-1.85649	3.09994e-07	-1.01085	0.000540252	-0.714513	0.000261979	-0.545392	0.00508912
	ATCG01060	Encodes the PsaC subunit of photosystem I.	2	-0.111685	0.955804	0.176107	0.928715	-0.99965	0.000685421	-0.645018	0.710578	-0.753315	0.675037	-0.299892	0.107531	-0.40019	0.044814	-0.326265	0.269873	-1.57781	1.1335e-05	-0.882988	0.0060616	-0.321883	0.0711933	-0.409687	0.034989
	ATCG00140	ATPase III subunit	2	0.125023	0.977515	0.260319	0.953286	-0.966052	0.00160075	-0.826174	0.832945	-0.959138	0.814189	-0.482065	0.00429707	-0.41818	0.0165381	-0.215291	0.518489	-1.73398	9.54064e-06	-0.760297	0.0254029	-0.464467	0.00406533	-0.536424	0.00232444
	ATCG00430	Encodes a protein which was originally thought to be part of photosystem II but its wheat homolog was later shown to encode for subunit K of NADH dehydrogenase.	2	-0.36887	0.942316	-0.229136	0.964138	-0.648445	0.00330574	-0.322332	0.944727	-0.303379	0.9505	-0.745147	0.00609018	-0.749525	0.00749061	0.713364	0.00451008	-0.963427	0.000266155	-0.597198	0.0209008	-0.776404	0.00720182	-0.643066	0.0281662
	ATCG00490	large subunit of RUBISCO. Protein is tyrosine-phosphorylated and its phosphorylation state is modulated in response to ABA in Arabidopsis thaliana seeds.	2	-0.28672	0.967329	-0.294331	0.965845	-0.479509	0.189609	-0.351435	0.956135	-0.651062	0.919749	-1.22055	0.00141428	-1.52029	0.00045135	-1.37657	0.00150287	-0.501833	0.173856	0.187965	0.686135	-0.163569	0.703832	-0.25371	0.578541
	ATCG00480	chloroplast-encoded gene for beta subunit of ATP synthase	2	-0.16092	0.978486	0.0555469	0.992275	-0.984754	0.000607237	-0.99016	0.85083	-0.847054	0.877372	-0.559796	0.0377952	-0.560779	0.0451877	-0.772937	0.00859925	-0.362798	0.16664	0.337214	0.261067	-0.160454	0.532725	-1.0192	0.00122285
	AT1G79870	Hydroxyphenylpyruvate reductase (HPPR), which catalyzes the reduction of 4-hydroxyphenylpyruvic acid (pHPP) to 4-hydroxyphenyllactic acid (pHPL). Together with HPPR3 and TAT1 involved in the biosynthesis of pHPL from tyrosine.	2	-0.815801	0.00774717	-0.494853	0.0897744	-0.00600342	0.981017	-1.00318	0.00111743	-0.702294	0.0204686	-1.40912	0.000195124	-1.07686	0.00300431	-0.496472	0.0493712	-0.159758	0.47382	0.110215	0.682554	-0.277528	0.379433	-0.575969	0.0893522
	AT1G56190	One of a pair of plastid localized phosphoglycerate kinases involved in galactolipid biosynthesis. Functions redundantly with AT3g12780 (PGK1) in the chloroplast in the biosynthesis of thylakoid membrane galactolipids. Double mutants are photosynthetically incompetent, plants are albino and seedling lethal.	2	-0.856527	0.225374	-0.427405	0.566579	-0.0910078	0.7019	-1.04877	0.150324	-0.768135	0.324263	-0.775594	0.000659176	-1.04563	6.9862e-05	-0.80713	0.00177311	0.0412485	0.86471	0.0310997	0.916192	-0.897737	0.000104701	-0.933817	0.000138266
	AT5G61410	Arabidopsis thaliana ribulose-5-phosphate-3-epimerase mRNA	2	-0.85584	0.034914	-0.541404	0.17651	-0.901915	0.00032354	-1.22208	0.00524502	-1.02465	0.0204276	-0.766722	0.0036068	-0.818233	0.00350263	-0.970396	0.000442588	-0.0599749	0.80264	0.0288125	0.923519	-0.598413	0.015342	-0.45052	0.0833729
	AT4G32590	2Fe-2S ferredoxin-like superfamily protein;(source:Araport11)	2	-0.992865	0.00238521	-0.630449	0.0393723	-0.730637	0.00440221	-1.66117	1.88806e-05	-1.50542	8.44943e-05	-0.765503	0.00660996	-0.702528	0.0166769	-0.966444	0.0012846	-0.150009	0.547392	-0.0554233	0.864701	-0.702962	0.00894634	-0.6788	0.0174922
	AT3G01440	Encodes a subunit of the NAD(P)H complex located in the chloroplast thylakoid lumen.	3	-5.16871	8.8473e-07	-4.24234	3.36252e-06	-3.14071	8.27365e-06	-7.95983	5.59728e-07	-6.01093	5.02335e-07	-1.16015	0.00116589	-1.39138	0.000410445	-1.42274	0.00124855	1.47294	0.00841973	0.320953	0.65889	-0.305565	0.334583	-0.699873	0.0404131
	AT4G26530	Aldolase superfamily protein;(source:Araport11)	3	-4.17818	0.1916	-3.50471	0.2833	-3.53071	1.38543e-05	-9.45015	0.00306755	-7.94608	0.0114295	-3.12719	1.19646e-08	-3.12753	4.73034e-08	-1.57302	0.0262765	-0.853052	0.158884	-0.0120331	0.988808	-1.65593	1.58283e-05	-0.601806	0.073762
	AT4G02630	Protein kinase superfamily protein;(source:Araport11)	1	-5.29638	2.99935e-06	-4.64415	7.00524e-06	-2.83084	5.77464e-06	-4.21299	4.00012e-07	-3.84584	4.78375e-07	0.911746	0.00023019	0.933461	0.00035624	-0.887811	0.0173138	-1.29024	0.00294751	-0.576255	0.184015	-0.565109	0.00896872	0.0270435	0.918536
	AT2G28605	Encodes a PsbP domain-OEC23 like protein localized in thylakoid (peripheral-lumenal side).	1	-3.90607	8.73057e-06	-3.13168	8.13069e-05	-2.26982	9.17264e-05	-4.34805	3.68019e-06	-3.87279	1.66619e-05	-0.396744	0.309311	-0.180148	0.681165	-0.892911	0.0257572	1.53879	0.000821624	1.23528	0.0113325	-1.94113	3.09339e-06	-0.97707	0.00576431
	AT4G37925	Encodes subunit NDH-M of NAD(P)H:plastoquinone dehydrogenase complex (Ndh complex) present in the thylakoid membrane of chloroplasts. This subunit is thought to be required for Ndh complex assembly.	1	-4.71852	8.65247e-05	-4.95656	8.34086e-05	-2.64711	3.44445e-06	-4.86224	0.000177935	-3.80557	0.00178803	-0.262893	0.321832	-0.239038	0.407613	-0.7758	0.038513	-0.0535294	0.905973	0.248256	0.605439	-1.91604	1.72201e-07	-0.767535	0.00737412
	AT3G16250	encodes a novel subunit of the chloroplast NAD(P)H dehydrogenase complex, involved in cyclic electron flow around photosystem I to produce ATP. Contains a 4Fe-4S cluster.	1	-2.01973	0.00102467	-1.72679	0.00351816	-3.84124	2.82976e-06	-5.00413	1.39963e-07	-5.48037	8.01529e-08	-2.21164	5.69773e-07	-2.13375	2.37204e-06	-2.36244	3.66863e-05	0.596767	0.210111	0.667088	0.226449	-1.87531	1.801e-06	-0.983936	0.00357122
	AT2G01918	Encode a protein homologous to each PQL protein. Mutational analysis indicates that PQL3 is also required for NDH activity.	1	-3.4078	8.70709e-05	-3.4718	0.000308938	-4.44376	0.000648431	-4.52865	2.87018e-05	-4.91087	3.17638e-05	-2.1866	1.46727e-07	-1.71487	5.71499e-06	-1.34337	0.0208979	-0.743645	0.18972	-0.0502393	0.948008	-1.55094	3.2086e-06	-0.876561	0.00275947
	AT1G19150	PSI type II chlorophyll a/b-binding protein (Lhca2*1) mRNA, The mRNA is cell-to-cell mobile.	1	-3.40091	0.000387	-2.49363	0.0049804	-3.92215	7.91851e-07	-6.19408	8.60675e-05	-4.96688	0.000876189	-1.11873	2.42501e-05	-1.3902	5.57484e-06	-1.86196	0.000213382	-1.68867	0.00970752	-0.808605	0.201951	-1.07907	2.2607e-05	-0.605891	0.0091799
	AT1G70760	a subunit of the chloroplast NAD(P)H dehydrogenase complex, involved in PSI cyclic electron transport. Located on the thylakoid membrane. Mutant has impaired NAD(P)H dehydrogenase activity. The mRNA is cell-to-cell mobile.	1	-2.48582	0.033584	-2.12671	0.0684691	-2.02469	3.15639e-06	-4.79689	0.000420861	-3.11789	0.0200177	-0.811285	0.000389801	-0.987104	0.000110649	-0.607757	0.0746038	0.889681	0.0066699	0.947267	0.00848206	-1.10792	8.1848e-06	-0.70414	0.00194651
	AT1G32470	Single hybrid motif superfamily protein;(source:Araport11)	1	-1.82568	0.105258	-1.23921	0.287054	-2.48622	6.19097e-05	-5.10674	0.000130092	-4.20266	0.00122874	-1.13818	4.67855e-05	-1.1343	0.000106691	-1.17371	0.0282703	1.6723	0.00249553	1.1492	0.0431225	-0.93325	0.000257764	-0.921499	0.000572771
	AT1G14150	Encodes a subunit of the NAD(P)H dehydrogenase complex located in the chloroplast thylakoid lumen.	1	-3.63625	0.00281747	-2.31208	0.0487857	-2.78535	6.02052e-06	-5.00162	0.00248798	-3.74985	0.0235599	-1.8623	5.56869e-06	-2.11319	3.84437e-06	-0.974822	0.0126572	-0.296266	0.528112	-0.228712	0.692546	-1.30045	8.86625e-05	-0.765753	0.0142705
	AT5G38420	Encodes a member of the Rubisco small subunit (RBCS) multigene family: RBCS1A (At1g67090), RBCS1B (At5g38430), RBCS2B (At5g38420), and RBCS3B (At5g38410). Activated by OXS2 under the treatment of salt.	1	-2.35702	0.0840873	-1.97124	0.15019	-3.28663	3.61959e-06	-4.76266	0.000624106	-3.78791	0.00744218	-1.41191	1.29653e-05	-1.24688	0.000115054	-0.976564	0.0899676	-0.256463	0.637876	0.301582	0.63491	-0.519503	0.0376618	-0.470739	0.0786355
	AT5G58260	Encodes subunit NDH-N of NAD(P)H:plastoquinone dehydrogenase complex (Ndh complex) present in the thylakoid membrane of chloroplasts. This subunit is thought to be required for Ndh complex assembly.	1	-2.65083	0.000188231	-2.41099	0.000449182	-2.33875	4.00907e-06	-4.19215	2.79373e-05	-3.23681	0.000522892	-1.05095	1.03001e-05	-1.11649	1.31336e-05	-1.02794	0.00320704	-0.296401	0.516517	0.187636	0.729306	-0.880275	5.03013e-05	-0.748381	0.000558698
	AT2G01590	Likely a subunit of the chloroplast NAD(P)H dehydrogenase complex, involved in PSI cyclic electron transport. Located in the membrane fraction of chloroplast. Mutant has impaired NAD(P)H dehydrogenase activity.	1	-3.28531	3.58554e-06	-2.44751	7.29001e-05	-2.73664	3.0347e-06	-4.25857	3.69542e-05	-3.33504	0.000689636	-1.52674	6.91522e-07	-0.992526	0.000163419	-1.15975	0.00184995	0.135701	0.816547	0.739805	0.199579	-0.752879	0.000751909	-0.335518	0.124852
	AT5G36120	One of four Arabidopsis homologs of bacterial ymlg proteins.	1	-3.58855	3.5487e-07	-2.85629	3.2705e-06	-1.66733	1.04333e-05	-2.46646	6.80673e-06	-2.30172	1.84811e-05	-1.70017	0.00890314	-2.53749	0.00314681	-1.49654	6.84343e-05	-0.284591	0.474604	0.797924	0.0491991	-1.19013	0.0050199	-0.520852	0.196317
	AT1G76100	One of two Arabidopsis plastocyanin genes. Expressed at 1/10th level of PETE2. Does not respond to increased copper levels and is thought to be the isoform that participates in electron transport under copper-limiting conditions. Mutation of this gene does not have obvious effect on photosynthesis.	1	-3.90197	6.81156e-07	-3.7298	1.01679e-06	-1.59077	0.000851832	-2.60325	0.000559885	-1.74816	0.0189151	-3.35103	7.46103e-09	-2.10195	2.02525e-06	-0.150351	0.774117	-1.02682	0.0179436	-0.0396366	0.947872	-0.466646	0.0975357	-0.310153	0.315651
	AT1G03600	PSB27 is a chloroplast lumen localized protein that is involved in adaptation to changes in light intensity.	1	-2.50325	0.00276344	-2.02649	0.0126111	-2.5714	1.37127e-05	-3.1333	0.00616886	-2.44411	0.0372613	-3.94404	1.99734e-08	-2.92795	1.47683e-06	-0.832678	0.076894	-1.56103	0.00166104	-0.499287	0.319493	-1.27909	0.00225503	-0.743651	0.0789393
	AT4G12800	Encodes subunit L of photosystem I reaction center.	1	-2.18559	0.293445	-1.53555	0.481127	-1.41869	0.000122293	-2.23039	0.279303	-1.90819	0.372632	-4.01705	3.87861e-09	-3.68029	3.37373e-08	-1.36596	0.000489217	-0.44863	0.144017	0.65199	0.0661688	-1.14014	0.0024492	-0.984464	0.0118546
	AT3G47470	Encodes a chlorophyll a/b-binding protein that is more similar to the PSI Cab proteins than the PSII cab proteins. The predicted protein is about 20 amino acids shorter than most known Cab proteins.	1	-2.53501	0.427578	-2.42324	0.446614	-1.89108	7.95339e-05	-2.59493	0.392842	-2.13135	0.503137	-3.36909	2.89273e-08	-3.20451	1.79789e-07	-1.11738	0.0139939	-0.108204	0.819966	-0.240541	0.6433	-1.75351	4.65126e-05	-1.49437	0.000511891
	AT2G30570	Encodes PsbW, a protein similar to photosystem II reaction center subunit W. Loss of PsbW destabilizes the supramolecular organization of PSII.	1	-2.22054	0.218051	-1.52992	0.418335	-1.54547	0.00049402	-2.24861	0.213952	-1.84699	0.343175	-1.08864	0.000109072	-1.15375	0.000123685	-1.64325	0.000706083	-1.83122	0.000112056	-1.25011	0.00685607	-1.07576	8.00535e-05	-0.777142	0.003324
	AT1G79040	Encodes for the 10 kDa PsbR subunit of photosystem II (PSII). This subunit appears to be involved in the stable assembly of PSII, particularly that of the oxygen-evolving complex subunit PsbP. Mutants defective in this gene have reduced amounts of subunits PsbP and PsbQ in PSII. In turn, assembly of PsbR is dependent on the presence of PsbJ.	1	-1.54926	0.607849	-1.11488	0.719497	-1.16858	0.00203399	-2.45144	0.379651	-1.84727	0.529772	-0.358966	0.17896	-0.624851	0.0295637	-0.485346	0.215728	-1.52033	0.000316357	-0.923264	0.0265625	-0.867621	0.00169127	-0.839502	0.00391977
	AT2G39730	Rubisco activase, a nuclear-encoded chloroplast protein that consists of two isoforms arising from alternative splicing in most plants. Required for the light activation of rubisco. Involved in jasmonate-induced leaf senescence.	1	-1.86916	0.536886	-1.22549	0.694432	-1.71031	9.37938e-06	-3.37779	0.228091	-2.41337	0.408988	-1.08508	8.06461e-05	-1.07763	0.000177701	-0.221962	0.525289	-1.18807	0.000332098	-0.424468	0.192046	-1.32614	4.39445e-06	-1.15272	4.86172e-05
	AT3G14415	Encodes a glycolate oxidase that modulates reactive oxygen species-mediated signal transduction during nonhost resistance. The mRNA is cell-to-cell mobile.	1	-2.09734	0.0407842	-2.33163	0.0196224	-1.45328	1.7447e-05	-2.06951	0.0493216	-1.7603	0.109944	-0.934683	0.249522	-0.45937	0.573867	-0.611811	0.0374788	-0.187556	0.495443	0.283746	0.355201	-2.99391	0.0037119	-1.10154	0.0812704
	AT2G05620	Involved in electron flow in Photosystem I. Essential for photoprotection.	1	-2.17934	2.12225e-05	-2.07838	2.94003e-05	-1.2308	0.000518901	-2.26688	0.000194394	-1.62928	0.00559354	-1.86251	8.86751e-06	-1.66528	4.98465e-05	0.394168	0.199246	-0.106077	0.739689	0.55117	0.0925501	-2.94298	1.68765e-09	-1.27475	0.000266696
	AT1G34000	Encodes a novel member of the Lhc family from Arabidopsis with one predicted transmembrane alpha-helix closely related to helix I of Lhc protein from PSI (Lhca4). Gene expression is triggered by light stress and both transcript and protein accumulate in a light intensity-dependent manner. Ohp2 is associated with PSI under low- or high-light conditions. Together with OHP1, OHP2 is essential for th…	1	-1.7786	1.89612e-06	-1.39978	2.53552e-05	-1.07587	0.00075894	-1.23584	0.000138763	-0.826997	0.00735966	-1.94863	1.71757e-05	-1.49816	0.000389201	-0.799257	0.0108915	-1.53635	2.26708e-05	-0.149026	0.639609	-1.78398	1.30821e-05	-0.555219	0.118716
	AT3G16140	Encodes subunit H of photosystem I reaction center subunit VI.	1	-1.58488	0.187251	-1.17515	0.336378	-1.2961	0.000708775	-2.10994	0.0733537	-1.68001	0.173703	-1.61305	1.24661e-06	-1.76072	1.43296e-06	-0.802794	0.0362294	-0.572575	0.0964898	0.0141718	0.978471	-1.03329	0.000146846	-0.747927	0.00498379
	AT2G20260	Encodes subunit E of photosystem I. The mRNA is cell-to-cell mobile.	1	-1.45749	0.204749	-0.900273	0.452289	-1.36822	0.00145884	-1.88065	0.0828061	-1.47956	0.196855	-1.80882	8.02443e-07	-1.836	2.12569e-06	-0.671077	0.12398	-0.777055	0.0578631	-0.149655	0.77554	-1.2305	4.72458e-05	-1.14155	0.000217477
	AT1G55670	Encodes subunit G of photosystem I, an 11-kDa membrane protein that plays an important role in electron transport between plastocyanin and PSI and is involved in the stability of the PSI complex. PSI-G subunit is bound to PSI-B and is in contact with Lhca1. The protein inserts into thylakoids by a direct or "spontaneous" pathway that does not involve the activities of any known chloroplast protei…	1	-1.70312	0.43122	-1.17223	0.600174	-1.70688	0.000159858	-1.92639	0.349643	-1.54992	0.474119	-1.21763	0.000144152	-1.43201	5.65603e-05	-0.32811	0.471696	1.38004	0.00196239	1.54813	0.00167839	-1.13175	0.000222109	-0.862487	0.00457668
	AT4G32260	ATPase, F0 complex, subunit B/B, bacterial/chloroplast;(source:Araport11)	1	-1.17226	0.375835	-0.814615	0.5477	-1.03616	0.000105701	-2.44899	0.0423185	-1.74288	0.178808	-0.968225	0.0231792	-0.888613	0.0477558	0.00810857	0.978332	-0.141966	0.549435	0.596189	0.0230887	-0.941114	0.0221203	-0.509961	0.247106
	AT4G33010	glycine decarboxylase P-protein 1;(source:Araport11)	1	-1.05591	0.683038	-0.851885	0.74621	-1.38184	0.000191859	-2.61321	0.261727	-2.21344	0.359504	-1.86585	5.49638e-07	-1.81114	2.41155e-06	-0.514234	0.145398	0.0639154	0.852014	0.69559	0.044829	-1.04652	0.000283313	-0.748635	0.0084718
	AT1G42970	Encodes chloroplast localized glyceraldehyde-3-phosphate dehydrogenase that can use both NADH and NADPH to reduce 1,3-diphosphate glycerate. It forms A2B2 heterotetramers with GapA forms of the GADPH enzyme. These complexes are active in the light under reducing conditions, but show reduced NADPH-dependent activity in response to oxidized thioredoxins and increased NAD(H)/NADP(H) ratios due to th…	1	-1.50287	0.340239	-0.942427	0.570103	-1.61997	2.94701e-05	-3.71441	0.0200354	-2.96949	0.0693793	-1.51075	8.22449e-06	-1.41146	4.33375e-05	-0.580177	0.0920462	0.935761	0.0033069	0.66592	0.0427162	-0.943619	0.000902128	-0.744053	0.00995352
	AT4G03280	Encodes the Rieske FeS center of cytochrome b6f complex. Gene is expressed in shoot but not in root. Mutant has reduced electron transport at saturating light intensities and Q-cycle activity is hypersensitive to acidification of the thylakoid lumen. The mRNA is cell-to-cell mobile.	1	-1.13365	0.375403	-0.684742	0.609393	-1.3564	0.000132358	-2.49946	0.0325471	-1.8887	0.128455	-1.02561	2.08893e-05	-1.08575	2.70982e-05	-1.02747	0.00361108	0.909917	0.00534589	0.622929	0.0671418	-0.765383	0.000331103	-0.631228	0.00338828
	AT3G55330	Facilitates the assembly of the photosystem II supercomplexes and optimizes plant pitness under fluctuating light.	1	-1.43149	0.000117509	-0.861534	0.00881513	-2.35094	2.66346e-05	-2.68861	1.01695e-07	-2.35246	8.34451e-07	-0.644132	0.00297314	-0.633839	0.00536676	-1.15678	0.0113477	0.923928	0.0338342	0.399053	0.434012	-0.604093	0.00375369	-0.578551	0.00861607
	AT5G51545	Encodes LPA2 (low psii accumulation2), an intrinsic thylakoid membrane protein required for efficient assembly of Photosystem II.	1	-2.50283	7.95739e-06	-1.97433	9.29089e-05	-1.7462	7.6307e-06	-2.25505	1.8505e-05	-1.96678	0.000123501	-0.573989	0.165171	-0.780664	0.0759424	-1.40393	0.00010561	0.207682	0.383682	-0.324716	0.249388	-0.622373	0.0902836	-0.293786	0.472288
	AT5G44520	NagB/RpiA/CoA transferase-like superfamily protein;(source:Araport11)	1	-2.18457	3.70778e-05	-1.29078	0.0049305	-1.58841	0.000531662	-2.22129	0.000108787	-1.5755	0.00432881	-1.03757	0.00077455	-0.857309	0.00576137	-0.753645	0.0510289	-0.00203022	0.995725	-0.0309472	0.951764	-0.56978	0.0348643	-0.458464	0.11258
	AT2G31040	Encodes an integral thylakoid protein that facilitates assembly of the membranous part of the chloroplast ATPase.	1	-2.07653	0.0119002	-1.32139	0.109227	-1.45195	0.000123699	-2.10813	0.00447921	-1.79755	0.0172715	-1.13552	3.01381e-05	-0.892153	0.000682385	-0.977153	0.00724694	0.576654	0.073169	0.255158	0.494497	-1.2165	8.36651e-06	-0.528295	0.0258769
	AT2G26500	cytochrome b6f complex subunit (petM);(source:Araport11)	1	-1.54402	0.0302454	-1.58435	0.0228333	-1.37712	4.10817e-05	-2.37154	0.00232561	-2.19783	0.00532549	-1.79429	2.33216e-05	-1.48168	0.000363738	-1.45001	7.95008e-05	0.401988	0.151229	0.13985	0.683875	-1.16053	0.00150089	-0.474968	0.19537
	AT3G56650	thylakoid lumenal protein (Mog1/PsbP/DUF1795-like photosystem II reaction center PsbP family protein);(source:Araport11)	1	-1.80436	8.73551e-06	-1.22595	0.000502285	-2.15015	7.11362e-06	-2.02236	1.00185e-05	-1.69584	0.000114185	-1.37615	0.000695486	-1.74842	0.000151909	-1.15764	0.00220098	0.507432	0.128093	0.586352	0.123971	-0.685594	0.0394762	-0.232469	0.534884
	AT1G20020	Encodes a leaf-type ferredoxin:NADP(H) oxidoreductase. It is present in both chloroplast stroma and thylakoid membranes but is more abundant in the stroma The mRNA is cell-to-cell mobile.	1	-2.0566	0.0619077	-1.29303	0.256162	-1.79979	3.85833e-06	-1.95365	0.0643925	-1.50451	0.177576	-1.48486	1.77425e-06	-1.55687	3.05703e-06	-1.64894	3.40983e-05	-0.00170107	0.995592	0.357072	0.257367	-0.800502	0.00107656	-0.791095	0.00218594
	AT3G21055	Encodes photosystem II 5 kD protein subunit PSII-T. This is a nuclear-encoded gene (PsbTn) which also has a plastid-encoded paralog (PsbTc).	1	-2.2996	0.178277	-1.80205	0.302848	-1.91487	7.4377e-05	-2.56725	0.142722	-2.05374	0.259844	-1.29106	0.000621296	-1.33773	0.000808638	-1.23233	0.00783047	0.469666	0.237856	1.04835	0.022457	-1.11605	0.00161385	-1.03295	0.00521854
	AT1G60950	encodes a major leaf ferredoxin	1	-2.81726	0.0149837	-1.88003	0.107559	-1.60014	0.00125865	-2.72394	0.0226742	-2.46257	0.0462223	-1.48062	0.000124704	-1.4888	0.000237863	-1.7765	0.00123711	0.957343	0.0391069	1.13474	0.0288424	-1.44066	0.000120094	-0.96316	0.00769636
	AT1G52230	Phosphorylation of this protein is dependent on calcium. The mRNA is cell-to-cell mobile.	1	-2.85615	0.0337212	-2.89004	0.0288015	-1.9837	1.94049e-05	-3.01847	0.0339796	-2.33331	0.125118	-1.55444	2.45794e-06	-1.80319	1.37915e-06	-0.854487	0.0362878	0.297189	0.428119	0.936946	0.0262426	-1.00985	0.000228683	-0.750044	0.00567277
	AT1G32060	phosphoribulokinase;(source:Araport11)	1	-2.85557	0.0708138	-1.97513	0.230776	-1.74143	1.35519e-05	-3.06589	0.0737483	-2.24884	0.216947	-1.25753	8.17298e-05	-1.71828	6.20302e-06	-0.613572	0.073762	-0.511916	0.0882526	0.421041	0.22338	-1.01633	0.00055934	-0.727163	0.0132348
	AT3G54890	Encodes a component of the light harvesting complex associated with photosystem I.	1	-2.57406	0.415528	-2.18655	0.491367	-2.10617	5.2076e-05	-3.16587	0.288859	-2.39528	0.442847	-1.63215	7.8418e-06	-1.80882	6.46303e-06	-0.248616	0.638882	-0.190707	0.685153	0.499515	0.328978	-1.29968	7.22662e-05	-1.01136	0.00168067
	AT2G06520	Encodes a protein with sequence similarity to the spinach photosystem II subunit PsbX.	1	-2.89042	0.024245	-2.27704	0.0765163	-1.57807	9.37645e-05	-2.34285	0.0862392	-1.87916	0.196811	-0.88657	0.000321135	-0.908682	0.000474882	-0.546345	0.145086	0.225758	0.534791	0.80185	0.0438505	-0.802251	0.000613105	-0.680579	0.00443891
	AT1G67740	PsbY precursor (psbY) mRNA. This single nuclear gene is imported into the chloroplasts where it is processed into two integral membrane proteins with identical topology (PsbY-1 and PsbY-2). The protein appears to bind manganese. Important for the redox control of cytochrome b559.	1	-2.66886	0.0769375	-2.06476	0.180917	-1.56941	6.59222e-05	-2.62443	0.0997213	-1.89931	0.243825	-1.89088	1.28391e-06	-1.81547	6.00468e-06	-0.244101	0.528646	0.346128	0.293489	1.05325	0.00681037	-0.890482	0.00250845	-0.429682	0.150161
	AT4G15510	A nuclear-encoded thylakoid lumenal protein that is associated with photosystem I (PSI) but is not an integral subunit of PSI. It is an PSI assembly factor that assists the proper folding and integration of PsaB and PsaA into the thylakoid membrane. It is involved in the assembly of PSI reaction center heterodimer core.	1	-2.2385	1.67029e-05	-1.72517	0.00025132	-1.62119	9.09853e-05	-2.4667	0.00010421	-2.17787	0.000536581	-1.32571	0.0297917	-1.10358	0.0629091	-0.300732	0.344559	0.501666	0.119827	0.60732	0.100342	-0.812738	0.0329038	-0.731705	0.0692536
	AT1G30380	Encodes subunit K of photosystem I reaction center. The mRNA is cell-to-cell mobile.	1	-2.43469	0.210664	-1.75692	0.388716	-1.76428	0.000390991	-2.72487	0.169211	-2.28987	0.260106	-1.50543	1.31146e-05	-1.5754	2.00792e-05	-0.510614	0.306179	0.293735	0.524446	0.596477	0.235253	-1.21363	9.94028e-05	-1.01735	0.00113623
	AT5G45040	Encodes a Class I cytochrome c family member possessing a high structural homology with photosynthetic cytochrome c(6) from cyanobacteria, but structurally and functionally distinct through the presence of a disulfide bond.	1	-1.92959	3.62273e-05	-1.26939	0.00153804	-3.68126	0.00827494	-2.67915	9.85726e-07	-3.61993	1.07509e-07	-0.848729	0.00160163	-0.515515	0.0482943	-1.25842	0.139933	-0.207257	0.756307	0.424741	0.544298	-0.377711	0.0966766	-0.0935271	0.728571
	AT1G44575	Encoding PSII-S (CP22), a ubiquitous pigment-binding protein associated with photosystem II (PSII) of higher plants. Involved in nonphotochemical quenching rather than in photosynthesis. Mutant has a normal violaxanthin cycle but has a limited capacity of quenching singlet excited chlorophylls and is tolerant to lipid peroxidation.	1	-1.21251	0.183277	-0.633792	0.511502	-1.42076	0.00028118	-4.10215	8.67976e-05	-3.68693	0.0004026	-0.443889	0.0618417	-0.731554	0.00551799	-0.718269	0.0570033	-0.277211	0.393397	0.297981	0.424432	-0.994109	0.000179166	-0.409574	0.101237
	AT1G74880	Encodes subunit NDH-O of NAD(P)H:plastoquinone dehydrogenase complex (Ndh complex) present in the thylakoid membrane of chloroplasts. This subunit is thought to be required for Ndh complex assembly.	1	-1.81029	0.00683701	-1.6689	0.0107515	-1.55208	3.89869e-05	-4.68718	1.59965e-06	-3.52214	6.98152e-05	-0.611089	0.0300504	-0.66623	0.0262818	-0.625674	0.0495763	-0.20065	0.510503	0.345919	0.303452	-0.775446	0.00607318	-0.476031	0.103151
	AT3G14420	Encodes a glycolate oxidase that modulates reactive oxygen species-mediated signal transduction during nonhost resistance. The mRNA is cell-to-cell mobile.	1	-1.43412	0.323926	-1.09473	0.457831	-1.28203	3.76971e-05	-3.49042	0.0120495	-2.56716	0.0831329	-1.51427	1.63656e-07	-1.48719	6.77294e-07	-0.510612	0.0662059	-0.743317	0.00557103	0.0126244	0.973436	-0.678871	0.000911084	-0.527202	0.0110457
	AT3G55800	Encodes the chloroplast enzyme sedoheptulose-1,7-bisphosphatase (SBPase), involved in the carbon reduction of the Calvin cycle. Increase in SBPase activity in transgenic lines accumulate up to 50% more sucrose and starch than wild-type. The mRNA is cell-to-cell mobile.	1	-1.78385	0.0680465	-1.13358	0.26042	-1.97787	1.10913e-05	-3.66247	0.00226744	-2.91114	0.0174042	-1.6334	3.60046e-07	-1.71937	6.39833e-07	-0.809393	0.0356489	-0.187253	0.58221	0.00693907	0.98761	-1.00781	7.23352e-05	-0.600283	0.0120463
	AT1G11860	Glycine cleavage T-protein family;(source:Araport11)	1	-2.20413	0.000360264	-1.43738	0.011964	-2.06387	5.12013e-06	-3.36351	1.62138e-05	-2.93271	0.000113707	-0.690908	0.0142743	-0.749778	0.0125583	-1.01564	0.00816625	0.0682523	0.8529	0.0998803	0.813562	-0.509048	0.0567031	-0.552172	0.0558666
	AT4G38970	Protein is tyrosine-phosphorylated and its phosphorylation state is modulated in response to ABA in Arabidopsis thaliana seeds.	1	-1.29417	0.577816	-1.0128	0.668162	-1.19166	7.03763e-05	-3.47069	0.105644	-2.64407	0.227712	-0.581589	0.0440888	-0.837169	0.00811933	-0.384266	0.161933	-0.598041	0.0134653	0.076091	0.80362	-0.894209	0.00287468	-0.628699	0.0404638
	AT2G46820	Encodes the P subunit of Photosystem I. About 25% of the TMP14 pool appeared to be phosphorylated, and this ratio is not affected by light. Contains seven phosphorylation sites on threonine residue and chloroplast targeting signal. Located in the proximity of PSI-L, -H and -O subunits. Forms oligomers with other members of CURT1 family to modulate grana structure.	1	-1.28399	0.429892	-0.679927	0.698001	-1.83655	1.50801e-05	-3.2102	0.032385	-2.62522	0.0995995	-0.933383	0.00020872	-0.894984	0.000589857	-0.735441	0.0454118	-0.325407	0.315406	0.609629	0.0980494	-0.807189	0.000613105	-0.879427	0.00051925
	AT5G64040	Encodes the only subunit of photosystem I located entirely in the thylakoid lumen. May be involved in the interaction between plastocyanin and the photosystem I complex. Phosphorylation of this protein is dependent on calcium.	1	-2.47734	0.0780559	-1.66532	0.253764	-2.70924	5.02112e-05	-3.51367	0.0122565	-2.88119	0.0488545	-2.02162	1.96178e-06	-1.98806	6.69196e-06	-1.04422	0.0876678	0.191864	0.757892	0.022735	0.978512	-1.27137	0.00025587	-0.91468	0.00764649
	AT4G28660	Similar to PsbW subunit of photosystem II.	1	-2.14271	7.14734e-05	-1.63815	0.000990582	-2.18644	3.71743e-06	-3.59728	2.63101e-05	-2.60074	0.0012582	-2.47385	1.50525e-06	-2.04722	2.24792e-05	-1.47962	0.00027327	-0.145121	0.825678	0.30401	0.670086	-2.4277	3.8863e-07	-0.6677	0.0727899
	AT1G12900	glyceraldehyde 3-phosphate dehydrogenase A subunit 2;(source:Araport11)	1	-2.76511	0.00270997	-2.26943	0.0114747	-2.66629	3.06565e-06	-3.49542	0.00254708	-2.95837	0.01228	-2.29159	2.60574e-07	-2.07136	2.66183e-06	-1.06652	0.0208963	-1.10205	0.00779775	-0.198104	0.682972	-0.70222	0.0187393	-0.703418	0.0280612
	AT3G62410	CP12-2 encodes a small peptide found in the chloroplast stroma. It belongs to the CP12 gene family thought to be involved in the formation of a supramolecular complex with glyceraldehyde-3-phosphate dehydrogenase (GAPDH) and phosphoribulokinase (PRK) embedded in the Calvin cycle. CP12-2 is coordinately regulated by light with the photosynthetic GAPDH and PRK. The annotation of this gene is based …	1	-1.89574	0.00404726	-1.88667	0.00355482	-1.72589	1.88674e-05	-3.25594	6.43871e-05	-2.68209	0.000713552	-1.85138	3.41982e-08	-1.6993	3.31609e-07	-1.44434	0.000321359	-0.304	0.330141	-0.156616	0.682854	-0.50239	0.0137148	-0.237288	0.272611
	AT2G13360	Encodes a peroxisomal photorespiratory enzyme that catalyzes transamination reactions with multiple substrates. It is involved in photorespiration.	1	-2.05449	0.251804	-1.99295	0.254711	-1.46845	2.92501e-05	-2.74689	0.116531	-2.23012	0.23572	-2.08186	8.05617e-09	-1.74573	2.06794e-07	-1.17828	0.000701805	-1.36849	0.00011038	-0.563227	0.0916929	-0.65418	0.00184258	-0.420545	0.0473338
	AT3G61470	Encodes a component of the light harvesting antenna complex of photosystem I. The mRNA is cell-to-cell mobile.	1	-2.33666	0.370666	-1.63093	0.53981	-1.56218	0.000680885	-2.09807	0.40095	-1.80192	0.490142	-1.80518	1.14921e-05	-2.20963	3.09818e-06	-0.494934	0.29155	-0.711201	0.0915353	0.13731	0.805375	-1.35234	0.000199902	-1.09068	0.00274087
	AT1G61520	PSI type III chlorophyll a/b-binding protein (Lhca3*1) The mRNA is cell-to-cell mobile.	1	-2.59888	0.415968	-2.13811	0.507422	-1.70292	8.21155e-05	-2.29586	0.452335	-1.76479	0.585181	-2.15518	2.94705e-07	-2.16584	9.27602e-07	-0.942795	0.020335	-0.452123	0.227834	-0.0786113	0.87795	-1.18751	0.000190924	-0.9826	0.00214563
	AT5G64380	Inositol monophosphatase family protein;(source:Araport11)	1	-2.85613	2.71959e-05	-2.09967	0.000525168	-2.64348	0.000146757	-3.11335	6.66344e-06	-2.15778	0.000438559	-1.12831	0.000182454	-0.768984	0.00781361	-0.681141	0.0908173	-0.77506	0.0246335	0.0311972	0.946662	-1.34164	1.64159e-05	-1.09617	0.000319002
	AT1G08380	Encodes subunit O of photosystem I.	1	-2.50501	0.0821913	-2.00745	0.168711	-1.63706	0.000348369	-2.3579	0.114953	-1.84278	0.252797	-1.55769	1.34808e-05	-1.62127	2.18739e-05	-1.40206	0.0030818	-0.579326	0.149247	0.225679	0.654033	-1.16541	0.000211196	-1.25366	0.000196057
	AT4G09650	Encodes the chloroplast ATPase delta-subunit. The mRNA is cell-to-cell mobile.	1	-2.48082	0.00118508	-2.27609	0.00228945	-1.90443	5.07831e-05	-2.83938	0.00336861	-2.44011	0.0130341	-1.38265	9.61993e-07	-1.35699	3.6644e-06	-1.44901	0.0017041	-0.507244	0.162594	-0.312699	0.463874	-1.00986	2.57575e-05	-0.621017	0.00526637
Mitochondrial electron transport/ATP synthesis	AT4G24570	Encodes one of the mitochondrial dicarboxylate carriers (DIC): DIC1 (AT2G22500), DIC2 (AT4G24570), DIC3 (AT5G09470). The mRNA is cell-to-cell mobile.	3	4.51281	1.62893e-07	4.79927	6.31592e-08	2.16114	0.00972775	2.42272	2.25224e-07	3.38735	1.10246e-07	2.01298	1.28299e-05	2.14672	1.57743e-05	1.40048	0.123501	-0.488664	0.633541	-0.993441	0.457753	2.31967	1.07304e-06	3.32024	1.38725e-08
	AT4G05020	Miitochondrial alternative NADH dehydrogenase.	3	2.8774	4.27643e-08	3.2429	1.21148e-08	3.57858	1.46664e-07	2.58216	1.34606e-06	2.58692	2.05716e-06	2.11827	2.78276e-06	1.19575	0.00200117	1.19789	0.0131836	0.137182	0.753747	0.236484	0.638489	2.57157	5.65008e-08	1.56936	7.31291e-05
	AT5G25450	Cytochrome bd ubiquinol oxidase, 14kDa subunit;(source:Araport11)	3	5.61367	4.27487e-06	6.06279	2.06429e-06	2.85137	0.156698	3.53111	1.46751e-06	3.17953	3.94076e-06	0.507887	0.0383992	0.225571	0.400158	0.217296	0.94709	1.6602	0.115278	1.34661	0.283764	1.12809	5.46548e-05	0.459755	0.071368
	AT1G32350	alternative oxidase 1D;(source:Araport11)	4	7.83098	4.84157e-05	7.64858	5.84772e-05	8.81029	0.00222	10.4234	2.98792e-06	8.80118	1.34651e-05	3.32785	1.25696e-05	1.43593	0.0279176	1.96113	0.654688	-2.24088	0.523812	-0.70902	0.864296	7.02284	2.15249e-09	4.72642	1.33893e-06
	AT4G01660	Encodes an ABC1-like protein, member of the ATH subfamily; putative ABC transporter; isolated by functional complementation of a yeast abc1 mutant The mRNA is cell-to-cell mobile.	1	1.46781	7.39065e-05	1.15404	0.000259035	1.46924	6.15101e-05	1.20442	0.00066588	1.34878	0.000422163	0.30709	0.0392771	0.289625	0.0660775	0.353079	0.326327	1.04057	0.00252452	0.559988	0.138708	0.71412	3.11649e-05	0.373322	0.01659
	AT3G08950	Encodes HCC1, homologue of the copper chaperone SCO1 (synthesis of cytochrome c oxidase 1) from the yeast Saccharomyces cerevisiae. SCO1 encodes a mitochondrial protein that is essential for the correct assembly of complex IV in the respiratory chain. HCC1 is localized in the mitochondrion. A chimeric yeast Sco1-Arabidopsis HCC1 protein complements yeast Sco1 activity. Embryos of hcc1 mutants bec…	1	0.648562	0.00391531	0.712699	0.0013802	1.05702	0.0810719	1.07687	4.81246e-05	0.963042	0.00017733	0.860005	0.00110937	0.578186	0.0266106	0.657351	0.350001	0.672764	0.278809	-0.391026	0.658852	0.976188	0.000213024	0.534843	0.0335419
	AT1G22840	Encodes cytochrome c. Contains two site II (TGGGCC/T) elements, which interact with a TCP-domain transcription factor, and a downstream internal telomeric repeat, and are required for expression of the Cytc-1 gene. Promoter directs preferential expression in root and shoot meristems and in anthers. Double mutants with CYTC-2 accumulate starch during the day, have delayed growth and development an…	1	1.27822	0.000919978	1.24096	0.000730024	1.3767	0.000605748	1.41765	0.000707788	1.01822	0.00739696	0.563994	0.0403967	0.208182	0.495885	-0.244826	0.61653	-0.353544	0.415115	0.304982	0.53113	1.12663	0.000196672	0.790626	0.00743214
	AT5G43430	Encodes the electron transfer flavoprotein ETF beta, a putative subunit of the mitochondrial electron transfer flavoprotein complex (ETF alpha is At1g50940) in Arabidopsis. Mutations of the ETF beta gene result in accelerated senescence and early death compared to wild-type during extended darkness. Also involved in the catabolism of leucine and chlorophyll degradation pathway activated during da…	1	0.785834	0.0178813	0.843746	0.00878125	0.0582205	0.921296	0.711065	0.0176953	0.448657	0.12062	0.0554303	0.750715	0.123496	0.488518	-0.174241	0.791611	0.564433	0.125106	0.107719	0.83704	0.492466	0.00243054	0.181632	0.271925
	AT1G80230	Rubredoxin-like superfamily protein;(source:Araport11)	1	0.933536	0.00159557	0.735555	0.00512423	0.798532	0.00569827	0.163161	0.574391	0.175578	0.566268	0.278512	0.751543	0.325664	0.720338	-0.120058	0.742173	0.377921	0.240689	0.126575	0.770399	0.0709875	0.892987	-0.145736	0.804363
	AT5G05370	Cytochrome b-c1 complex, subunit 8 protein;(source:Araport11)	1	1.5185	0.000335991	1.01013	0.00290371	0.943596	0.138345	0.453515	0.154953	0.6051	0.0766514	0.208323	0.286183	-0.0273188	0.914451	0.0743476	0.936685	0.233904	0.749892	0.19905	0.830266	0.717611	0.000499638	0.538328	0.00898368
	AT3G51790	Encodes a heme-binding protein located in the mitochondrial inner membrane that is involved in cytochrome c maturation.	1	0.786674	0.000841305	0.86908	0.000231242	0.851411	0.0304604	0.692829	0.00190148	0.62628	0.00488153	0.953443	0.000565517	0.129559	0.654211	0.0929217	0.866035	0.895005	0.0390608	0.61754	0.22705	0.233756	0.331155	-0.191115	0.475204
	AT3G52300	ATP synthase D chain;(source:Araport11)	1	0.0698372	0.846205	-0.0558501	0.872986	0.2508	0.191132	0.318969	0.323673	0.301673	0.373975	-0.163463	0.477807	-0.00459185	0.987306	0.390941	0.063229	0.766307	0.000584869	1.0063	0.000107377	0.562069	0.0106501	0.48183	0.0377372
	AT5G13450	delta subunit of Mt ATP synthase;(source:Araport11)	1	-0.108601	0.909437	-0.0936464	0.91862	0.350949	0.0742255	0.513277	0.571801	0.369954	0.699247	-0.155227	0.34574	-0.125858	0.487245	0.125696	0.589198	0.595978	0.00518357	0.663069	0.00502537	0.504527	0.00239412	0.25532	0.127862
	AT1G22450	subunit 6b of cytochrome c oxidase	1	0.194359	0.406445	0.32357	0.144383	0.513526	0.006101	0.2281	0.397124	0.174979	0.541661	-0.371018	0.349114	-0.385647	0.365958	-0.149547	0.480496	1.12097	1.23567e-05	0.664244	0.00490137	0.508426	0.184744	0.432889	0.302825
	AT3G03070	NADH-ubiquinone oxidoreductase-like protein;(source:Araport11)	1	0.0487717	0.870906	-0.0957135	0.721126	-0.0676682	0.749155	-0.128595	0.639549	-0.136808	0.635563	0.0203493	0.944939	-0.024714	0.940819	-0.354833	0.0958891	0.599716	0.00345201	0.442245	0.0459033	0.434463	0.0723162	0.349	0.182055
	AT4G37830	cytochrome c oxidase-like protein;(source:Araport11)	1	-0.0570419	0.889381	-0.215178	0.54486	0.430847	0.0150861	0.0534939	0.897207	0.038569	0.929396	-0.304995	0.115194	-0.209744	0.321727	-0.452868	0.0219541	0.298075	0.0867363	0.479989	0.0167404	0.371591	0.046737	0.245726	0.223236
	AT2G03690	Ubiquinone biosynthesis protein COQ4 homolog.	1	0.51159	0.253984	-0.0288621	0.949616	0.471494	0.195933	0.479242	0.165601	0.426799	0.231742	0.0959669	0.643355	0.0426021	0.86193	-0.435605	0.345352	0.608614	0.0405243	0.484088	0.159656	-0.205553	0.266891	-0.163136	0.428258
	AT1G15120	Ubiquinol-cytochrome C reductase hinge protein;(source:Araport11)	1	0.379626	0.305622	0.156942	0.666625	1.21703	0.000100014	0.215034	0.557019	0.168025	0.665823	-0.996373	0.00444387	-0.447586	0.178443	-0.0907967	0.798564	0.865556	0.00503106	0.441481	0.19695	0.0323264	0.921171	0.191232	0.561529
	AT1G47260	Encodes mitochondrial gamma carbonic anhydrase. Component of the NADH dehydrogenase complex.	1	0.270871	0.298479	0.201028	0.424702	0.248182	0.291123	0.298031	0.276349	0.0723441	0.811209	-0.287222	0.109209	-0.261795	0.17365	-0.0544466	0.861128	0.37711	0.124036	0.0132527	0.971984	0.257433	0.133293	0.129088	0.506035
	AT4G02580	NADH-ubiquinone oxidoreductase 24 kDa subunit;(source:Araport11)	1	-0.0981486	0.787805	0.0180214	0.961815	0.260661	0.115177	0.211444	0.572613	-0.082697	0.836357	-0.156466	0.326093	-0.0778847	0.672316	-0.21873	0.242698	0.171054	0.325268	-0.110147	0.610626	0.449892	0.00466945	0.306102	0.0611807
	AT2G02050	NADH-ubiquinone oxidoreductase B18 subunit;(source:Araport11)	1	0.16477	0.516738	0.0620308	0.806655	0.562505	0.0997918	0.10824	0.695883	-0.0587857	0.841563	-0.33389	0.045206	-0.377185	0.0340271	0.250272	0.545999	0.558276	0.107966	-0.207222	0.66802	0.373648	0.0208912	0.569369	0.0019434
	AT3G18410	NADH dehydrogenase ubiquinone 1 beta subcomplex subunit 10-B-like protein (Complex I subunit NDUFS6);(source:Araport11)	1	0.472925	0.0497667	0.286504	0.190516	0.729294	0.00969089	0.484037	0.0630042	0.425884	0.109075	-0.201815	0.417429	-0.115394	0.68578	-0.356981	0.289105	0.327059	0.353165	-0.767816	0.104813	0.420669	0.0693708	0.364472	0.144872
	AT1G19580	Encodes mitochondrial gamma carbonic anhydrase. Component of the NADH dehydrogenase complex.	1	0.343816	0.161049	0.319333	0.169332	0.180826	0.538608	-0.615654	0.016073	-0.585595	0.0256937	-0.0750816	0.634504	-0.115794	0.484725	0.0404184	0.914941	0.577321	0.0253166	-0.244832	0.443761	0.368377	0.0117296	0.392642	0.0125337
	AT1G57600	MBOAT (membrane bound O-acyl transferase) family protein;(source:Araport11)	1	-0.305559	0.289594	-0.538999	0.0435492	0.216195	0.670164	0.319937	0.296734	0.175847	0.589519	0.339691	0.221593	0.156213	0.625795	0.064505	0.919562	0.557794	0.224002	0.115348	0.859945	1.39824	2.7591e-05	0.549975	0.0694673
	AT5G13430	Ubiquinol-cytochrome C reductase iron-sulfur subunit;(source:Araport11)	1	0.0743533	0.920233	-0.362403	0.546993	0.726249	0.0230447	-0.0877221	0.917387	-0.644739	0.395117	0.466744	0.0258639	0.22847	0.309796	-0.147054	0.717775	0.171537	0.674065	0.68842	0.106125	0.55641	0.00689002	0.409677	0.0556546
	AT2G21870	Encodes the FAd subunit of mitochondrial F1F0-ATP synthase. Essential for pollen formation.	1	0.272403	0.652157	0.153103	0.800207	0.477905	0.0191152	0.60091	0.317818	0.493675	0.4324	0.151617	0.335772	0.101725	0.565308	-0.0176697	0.947065	0.0358818	0.874703	0.247432	0.278906	0.398253	0.00954173	0.429965	0.00939717
	AT1G16700	Alpha-helical ferredoxin;(source:Araport11)	1	0.162478	0.626916	0.0778966	0.816098	0.47656	0.0581205	0.599977	0.0736998	0.464538	0.170841	-0.30363	0.104443	-0.276371	0.168426	-0.0911361	0.781654	0.00577703	0.985149	0.174362	0.596991	-0.011387	0.95385	0.0686011	0.748275
	AT5G37510	Encodes a subunit of the 400 kDa subcomplex of the mitochondrial NADH dehydrogenase (complex I). The protein has been isolated in the male gametophyte. The mRNA is cell-to-cell mobile.	1	0.20539	0.750839	0.386202	0.523151	0.705058	0.00051221	0.766641	0.220022	0.491939	0.44386	0.240083	0.104023	-0.103588	0.535526	-0.401977	0.040085	-0.417734	0.0224879	-0.102372	0.642044	0.051946	0.729962	-0.00233776	0.990252
	AT2G33040	gamma subunit of Mt ATP synthase;(source:Araport11)	1	0.200392	0.819328	0.331938	0.689948	0.443895	0.0242498	0.461981	0.578248	0.235822	0.791041	-0.0955846	0.508694	-0.107306	0.490628	-0.561814	0.009907	-0.574795	0.0049294	-0.0493581	0.846511	0.377975	0.00655151	0.306978	0.034431
	AT5G11770	NADH-ubiquinone oxidoreductase 20 kDa subunit;(source:Araport11)	1	0.348869	0.299615	0.385192	0.230613	0.7198	0.00588491	0.475398	0.164548	0.449405	0.203138	-0.0211233	0.917999	-0.163405	0.407375	-0.205218	0.481853	-1.50355	1.11576e-05	-0.427184	0.13137	0.584453	0.00159937	0.390041	0.0363606
	AT3G51390	DHHC-type zinc finger family protein;(source:Araport11)	1	-0.0580539	0.856217	-0.351873	0.17592	-0.314237	0.335422	0.962801	0.000104208	0.690204	0.00181975	-0.74978	0.000712849	-0.712459	0.00176038	-0.224747	0.54155	0.178898	0.517254	0.176076	0.59378	0.797547	0.000329797	0.849954	0.000325307
	AT5G61310	Cytochrome c oxidase subunit Vc family protein;(source:Araport11)	1	0.167314	0.919435	-0.201199	0.901081	-0.226639	0.457393	0.730075	0.604228	1.07254	0.452321	-0.141905	0.75729	-0.235364	0.625939	1.3076	0.000566026	-1.47817	0.000129844	0.936816	0.00836285	0.440527	0.259559	0.68111	0.105118
	AT2G43400	Encodes a unique electron-transfer flavoprotein:ubiquinone oxidoreductase that is localized to the mitochondrion. Mutants are more sensitive to sugar starvation when plants are kept in the dark for long periods.	1	0.091574	0.861472	0.656862	0.168006	-0.916674	0.00232359	0.384963	0.276469	0.111618	0.770618	0.740609	0.000474631	0.644524	0.00268131	-0.483844	0.0912887	-0.993942	7.51533e-05	-0.400467	0.0796211	1.26647	5.27548e-07	0.893287	8.80017e-05
	AT5G08680	Encodes the mitochondrial ATP synthase beta-subunit. This subunit is encoded by a multigene family of three members (At5g08670, At5g08680, At5g08690) that shared 98% sequence identity at the amino acid level. The mRNA is cell-to-cell mobile.	1	0.757126	0.227288	1.03126	0.0959382	0.915861	0.000174104	0.44974	0.536956	0.443706	0.563735	0.271653	0.552792	-0.172781	0.748531	-0.33088	0.142645	-0.0553537	0.815021	0.353933	0.14006	3.03304	1.69986e-05	2.15649	0.0014964
	AT3G22370	Encodes AOX1a, an isoform of alternative oxidase that is expressed in rosettes, flowers, and root. The alternative oxidase of plant mitochondria transfers electrons from the ubiquinone pool to oxygen without energy conservations. It is regulated through transcriptional control and by pyruvate. Plays a role in shoot acclimation to low temperature. Also is capable of ameliorating reactive oxygen sp…	1	2.19532	9.74162e-07	1.96608	1.07119e-06	1.2508	6.44056e-06	1.5209	2.54573e-05	1.59399	2.73558e-05	0.319433	0.341089	-0.343798	0.341424	-0.242239	0.32341	-0.732654	0.00254129	-0.780476	0.00461102	-0.722392	0.0260965	0.0589694	0.88378
	AT4G26210	Mitochondrial ATP synthase subunit G protein;(source:Araport11)	1	1.27251	0.00145078	1.65978	0.000141342	0.68447	0.13461	0.4564	0.189075	0.358487	0.319824	-0.166907	0.504025	-0.125435	0.652571	0.534896	0.304407	-0.643121	0.149473	-1.99716	0.00666923	0.667072	0.00576948	0.606519	0.0169861
	AT3G52730	ubiquinol-cytochrome C reductase UQCRX/QCR9-like family protein;(source:Araport11)	1	0.657274	0.171457	0.10893	0.82158	0.736698	0.0158476	0.0932184	0.849345	0.330685	0.508506	-0.0337664	0.877605	-0.117976	0.598683	0.59509	0.0701973	2.46097	3.10262e-07	1.38827	0.000367698	0.432546	0.0224329	0.418842	0.0388925
	AT5G13440	Ubiquinol-cytochrome C reductase iron-sulfur subunit;(source:Araport11)	1	0.630511	0.289146	0.395217	0.488092	0.775394	0.000492573	0.149755	0.825127	0.0541199	0.940206	0.307542	0.322927	0.249383	0.466445	0.497234	0.0232707	1.54406	4.98358e-07	1.2948	8.34977e-06	-0.0623792	0.845287	0.0101446	0.978487
	AT4G39740	Encodes HCC2, one of the two Arabidopsis genes (HCC1 and HCC2) resulting from a duplication with homology to the SCO proteins involved in copper insertion during cytochrome c oxidase (COX) assembly in other organisms. HCC2, which lacks the cysteines and histidine putatively involved in copper binding, functions in copper sensing and redox homeostasis.	1	0.475479	0.276681	0.331413	0.421233	1.05806	0.0095685	-0.111461	0.808169	0.332255	0.499976	0.855531	0.00261286	0.662179	0.0217137	0.59554	0.184887	2.63632	2.64068e-06	1.34132	0.00680133	0.458226	0.0727396	0.131688	0.657471
	AT3G17910	Encodes one of two Arabidopsis mitochondrial proteins similar to human SURF1 which is known to be involved in cytochrome c oxidase assembly. Mutations result in embryo lethality.	1	0.72486	0.00236833	0.9865	0.000154189	1.57412	0.00170466	0.676972	0.00810576	0.795286	0.00390419	0.597606	0.00210673	0.331842	0.0859236	1.28611	0.0148869	1.96515	0.000488853	1.60747	0.00676823	0.12706	0.473505	0.0395273	0.853373
	AT4G28510	prohibitin 1 (Atphb1)	1	-0.133995	0.766992	-0.44643	0.24009	1.86688	5.82867e-05	-0.135436	0.774803	0.0983423	0.851215	0.381726	0.0233173	0.255168	0.149434	2.25019	2.74487e-05	1.74768	4.75967e-05	0.501087	0.231309	0.416098	0.0107581	0.161425	0.351286
	AT1G53030	encodes a copper chaperone, can functional complements the yeast COX17 null mutant. May play a role in the delivery of copper to mitochondria. Expressed in roots and thus may also play a role in copper transport in the roots.	1	-0.0989629	0.799793	-0.133395	0.711332	1.09374	0.0200876	0.630777	0.0924096	0.473134	0.210587	0.295521	0.330688	-0.504786	0.131725	0.655349	0.211708	1.89818	3.56756e-05	0.946397	0.0323577	-0.294338	0.393973	0.832939	0.0121759
	AT1G02410	Encodes a member of the cytochrome c oxidase 11 protein family. It is an integral mitochondrial protein and likely plays an important role as a mitochondrial chaperone in COX complex assembly, affecting plant growth and pollen germination.	1	-0.0129078	0.966753	0.0131807	0.964658	0.268584	0.320821	0.49973	0.10565	0.650569	0.0506953	0.0805831	0.75046	-0.213188	0.403455	0.593372	0.0377431	0.669735	0.0170399	0.762769	0.01679	-1.1203	3.02384e-05	-0.259212	0.275726
	AT3G12260	LYR family of Fe/S cluster biogenesis protein;(source:Araport11)	1	-0.360311	0.547738	-0.496472	0.368519	0.165149	0.423283	-0.258541	0.648449	-0.203289	0.73903	-0.152068	0.445519	-0.0773148	0.739282	0.0598104	0.81753	1.15142	1.66823e-05	1.39461	5.08984e-06	0.122739	0.518453	0.165465	0.423419
	AT4G34700	Encodes the B22 subunit of eukaryotic mitochondrial Complex I. Mutation in the gene display pleiotropic phenotypes including shorter roots, smaller plants and delayed flowering. The mRNA is cell-to-cell mobile.	1	-0.071715	0.899651	-0.330886	0.49035	0.30789	0.177326	-0.249628	0.627262	-0.135014	0.812409	-0.45214	0.0169614	-0.416606	0.0362712	0.244142	0.341808	1.04135	0.000164516	0.627247	0.0186931	0.351171	0.0502649	0.330532	0.0865159
	AT2G19680	Mitochondrial ATP synthase subunit G protein;(source:Araport11)	1	-0.490523	0.0693236	-0.518345	0.0472964	0.0165138	0.972272	-0.323794	0.21731	0.0266636	0.932991	-0.0567176	0.89986	-0.296839	0.507402	0.3415	0.441063	2.36592	1.15574e-05	0.848106	0.0837195	-0.447311	0.238673	-0.000397689	0.99937
	AT1G66590	Mitochondrial copper chaperone which influences copper and iron homeostasis.	1	1.24513	0.000362489	0.760032	0.00932582	1.93824	0.112358	1.68067	1.80627e-05	1.7801	1.82859e-05	-0.54606	0.271389	-0.891598	0.0988126	0.689317	0.678955	1.8476	0.108079	1.16141	0.417388	0.761184	0.133712	0.800087	0.138511
	ATMG00960	Encodes a protein of the mitochondrial membrane which has been shown to be present in a number of unidentified complexes including a 500-KDa complex postulated to have heme lyase activity, in which another protein (AtCCMH, AT1G15220) is also involved. cytochrome c biogenesis orf203.	1	0.040628	0.901054	0.0205482	0.948438	-0.523102	0.632076	-0.720294	0.0103312	-0.788455	0.00672549	0.677477	0.288237	0.434454	0.547284	-0.0175973	0.98774	-4.06621	0.00871703	-1.69415	0.101112	0.112408	0.841011	-0.495327	0.428769
	ATMG00830	cytochrome c biogenesis orf382	1	0.684516	0.0946188	0.462457	0.281721	0.0261938	0.985556	-0.138519	0.745548	-0.620807	0.14699	-0.386995	0.112647	-0.305193	0.24602	-1.62013	0.407029	-1.3465	0.184879	-1.69524	0.203631	0.23781	0.309689	0.167503	0.524758
	AT1G28140	integral membrane family protein;(source:Araport11)	1	-0.882305	0.00883544	-0.660468	0.0401466	-0.158101	0.535969	-0.0840872	0.810333	0.00178198	0.996386	-0.42238	0.0216597	-0.393966	0.0418737	-0.713837	0.0123916	-1.23203	9.6469e-05	-0.594655	0.0397865	-0.631532	0.000952888	0.140378	0.474323
	AT1G49380	cytochrome c biogenesis protein family;(source:Araport11)	2	-3.14623	0.00269206	-3.12773	0.00271819	-2.69103	2.45827e-06	-2.77233	0.0249921	-2.50967	0.0498221	-1.52627	8.46661e-07	-1.32102	1.16116e-05	-0.698929	0.0515744	0.666389	0.0698339	0.616766	0.142411	-1.04065	4.45014e-05	-0.259894	0.262686
	AT1G07180	Internal NAD(P)H dehydrogenase in mitochondria. The predicted protein sequence has high homology with other designated NAD(P)H DHs from microorganisms; the capacity for matrix NAD(P)H oxidation via the rotenone-insensitive pathway is significantly reduced in the Atndi1 mutant plant line; the in vitro translation product of AtNDI1 is imported into isolated mitochondria and located on the inside of…	2	-0.531402	0.122949	-0.799457	0.0159635	-1.50509	0.000304629	-3.57949	1.26815e-05	-2.51321	0.000955657	-1.76692	2.29175e-05	-1.82907	3.51066e-05	1.62189	1.48427e-05	-1.04741	0.0132186	-0.780305	0.0936273	-1.56117	4.25017e-05	-0.974195	0.00639349
	AT5G58970	UCP2 and its paralog UCP1 is a member of the PUMP2 family of uncoupling proteins. It functions as a mitochondrial transporter of spartate, glutamate and dicarboxylates.	2	-1.88341	0.000372684	-1.91231	0.000302548	-1.15187	0.00894154	-1.2305	0.00955507	-1.07311	0.0275939	-0.0566837	0.884889	0.597117	0.0907897	-0.318442	0.440753	-0.0861557	0.809406	-0.386385	0.335268	-0.706803	0.0255024	-0.352314	0.285872
	AT5G40810	Cytochrome C1 family;(source:Araport11)	2	-0.548947	0.0494528	-0.324382	0.240036	0.0573966	0.776267	-0.925268	0.0127071	-0.807298	0.0331575	-1.16816	1.15956e-06	-0.892606	6.35623e-05	-0.33676	0.0922345	1.00091	2.77353e-05	0.529992	0.0145768	-0.670954	0.000371549	-0.231917	0.202273
	AT4G28220	NAD(P)H dehydrogenase B1;(source:Araport11)	2	-0.376718	0.22727	-0.371681	0.218397	0.324969	0.258592	-1.97107	1.07868e-05	-1.0939	0.00515341	-0.660091	0.000653581	-0.294564	0.115474	-0.351584	0.304036	0.046826	0.923345	-0.573071	0.291265	-0.267427	0.10973	0.0847296	0.665063
Glycolysis, Pentose Phosphate Pathway, and TCA cycle	AT3G55410	2-oxoglutarate dehydrogenase, E1 component;(source:Araport11)	2	1.87644	0.000104545	2.17434	2.21429e-05	0.859731	7.21324e-05	1.65355	0.000401896	1.3838	0.00181353	0.630674	0.000317167	0.50109	0.00388695	-0.56805	0.00493884	-0.133649	0.458693	-0.091124	0.675609	1.20505	5.73944e-08	0.718908	9.6876e-05
	AT2G47510	Encodes a mitochondrial-localized protein. The FUM1 gene appears to be essential, suggesting that FUM1 may play a crucial role as a fumarase in the tricarboxylic acid cycle.	2	1.19968	0.033221	1.1938	0.0258206	0.80802	0.000218061	1.38602	0.0159506	1.04978	0.0567372	1.07281	6.3025e-05	0.862624	0.000998238	-0.0560713	0.822653	-0.428682	0.04082	-0.315054	0.187064	1.22247	7.15024e-06	0.793702	0.00143207
	AT1G12000	Phosphofructokinase family protein;(source:Araport11)	2	1.56396	3.59104e-06	1.98086	3.00555e-07	1.04541	0.000816284	0.929637	0.00120588	0.496482	0.0490742	0.944825	0.000462872	0.861234	0.00180491	-0.0217763	0.956182	-0.0616324	0.883082	0.504226	0.218256	0.822149	0.00106221	1.32053	1.35062e-05
	AT5G55070	Dihydrolipoamide succinyltransferase;(source:Araport11)	2	0.87839	0.00539803	1.42119	0.000124235	1.17236	1.99618e-05	0.427933	0.22105	0.423362	0.243534	0.603652	0.000446256	0.559778	0.00151587	-0.0630787	0.82131	0.229147	0.304184	0.524154	0.0380803	0.813692	1.07408e-05	0.57909	0.00085518
	AT2G22480	phosphofructokinase 5;(source:Araport11)	2	1.17749	0.000191895	0.917934	0.000816696	1.53218	4.10452e-05	1.71504	1.6659e-06	1.4328	1.09271e-05	0.27221	0.228949	0.266889	0.274055	0.19906	0.599206	0.251598	0.456123	0.573402	0.123233	1.58687	2.34784e-07	1.16361	2.75835e-05
	AT5G03290	Encodes a catalytic subunit of the mitochondrially-localized NAD+- dependent isocitrate dehydrogenase. The mRNA is cell-to-cell mobile.	2	1.22492	0.00145891	1.28557	0.00075133	1.14335	0.000131117	1.53497	8.30668e-05	1.34665	0.000321146	0.0408155	0.798019	-0.231311	0.133984	0.448297	0.109632	0.60546	0.0181228	0.412867	0.147213	0.541646	0.000495113	0.494862	0.00207071
	AT4G37870	Encodes a phosphoenolpyruvate carboxykinase that localizes to the cytosol.	2	2.12372	0.00980262	0.712477	0.2866	-0.135172	0.648916	1.62582	0.0111443	1.56455	0.0164269	0.0573358	0.834133	0.223917	0.408503	-0.392373	0.197311	0.434083	0.129424	0.434186	0.175922	1.24476	2.43265e-05	1.00038	0.000526246
	AT2G44350	encodes a mitochrondrion targeted citrate synthase, the first enzyme of the tricarboxylic acid cycle, catalyzing the condensation of acetyl-CoA and oxaloacetate, finally yielding citrate and CoA.	2	2.39314	1.01018e-05	2.68482	2.61892e-06	1.00023	0.000303967	2.37118	1.17164e-05	1.77035	0.000158371	0.129179	0.41344	0.0707713	0.697901	0.141233	0.624313	0.579524	0.0201641	0.270342	0.335813	1.67313	3.54172e-10	0.886292	6.94968e-06
	AT2G27510	ferredoxin 3;(source:Araport11)	2	1.91052	0.000342799	2.94009	1.87961e-05	1.20384	0.0249434	1.64459	0.000103064	1.06755	0.00229066	1.07514	0.000161193	0.58872	0.0266112	0.558106	0.378186	0.901107	0.0363542	0.219495	0.708433	0.467027	0.0491924	0.426797	0.0942885
	AT3G04120	encodes cytosolic GADPH (C subunit) involved in the glycolytic pathway but also interacts with H2O2 potentially placing it in a signalling cascade induced by ROS. The mRNA is cell-to-cell mobile.	2	2.70078	0.000875908	2.47913	0.00177409	1.13978	0.00025241	0.586631	0.457201	0.626656	0.44176	0.476023	0.0199632	0.0484318	0.84804	-0.0205692	0.952499	0.0466709	0.873439	0.244795	0.415438	0.909993	7.75621e-05	1.37956	8.96809e-07
	AT5G24400	Encodes a protein with 6-phosphoglucunolactonase activity that localizes to the chloroplasts and the peroxisome. However, mutant phenotypes observed in pgl3 mutant plants can be complemented with a chloroplast-targeted version of the protein. PGL3 likely functions in the oxidative branch of the pentose phosphate pathway. pgl3 mutant phenotypes suggest that it is important in pathogen defense and …	2	1.49154	3.35944e-06	1.27914	5.6593e-06	0.42878	0.170727	0.893439	0.000135547	0.651134	0.0021187	0.904791	0.305036	0.886233	0.34672	-0.558081	0.15109	-0.482115	0.0917978	-0.535238	0.114296	2.40897	0.000943595	2.13555	0.00460544
	AT2G36460	Aldolase superfamily protein;(source:Araport11)	2	0.693253	0.101413	1.08794	0.0133318	0.43114	0.0487814	0.371848	0.242271	0.343654	0.299998	0.878189	6.26393e-05	0.582727	0.0046121	-0.351587	0.140643	-0.0512162	0.836446	-0.0769832	0.784934	1.64679	7.81527e-09	1.56168	3.72203e-08
	AT3G02360	6-phosphogluconate dehydrogenase family protein;(source:Araport11)	2	1.70743	0.0395599	1.6624	0.0349502	0.807831	0.00040867	1.69519	0.0333366	1.21275	0.109954	1.31861	0.000119168	0.481751	0.122767	-0.231945	0.297692	-0.819864	0.000377964	-1.23945	1.60612e-05	2.96118	1.11039e-09	1.75207	4.23204e-06
	AT5G13420	Transaldolase which contributes to reactive oxygen species homeostasis in response to Glc during early seedling growth.	2	2.67124	6.43014e-07	2.52875	5.02358e-07	1.17439	0.00378075	3.44932	6.26121e-08	2.901	2.77429e-07	1.12749	7.22296e-05	0.893279	0.00124994	0.575413	0.176421	1.09884	0.00591566	0.667084	0.119843	1.58759	5.54347e-07	1.58211	1.19521e-06
	AT1G74030	Encodes the plastid-localized phosphoenolpyruvate enolase. Mutant plants have abnormal trichomes.	2	3.11766	2.53429e-08	2.88168	1.22811e-08	0.134954	0.82585	2.99047	7.39839e-09	1.85622	1.04917e-07	1.33275	2.51823e-06	1.11714	4.64813e-05	-0.0910836	0.902842	1.27778	0.0557193	0.134257	0.896556	0.616845	0.00389008	0.859084	0.0004028
	AT4G26970	Encodes an aconitase that can catalyze the conversion of citrate to isocitrate through a cis-aconitate intermediate, indicating that it may participate in the TCA cycle and other primary metabolic pathways. The protein is believed to accumulate in the mitochondria and the cytosol. It affects CSD2 (At2g28190 - a superoxide dismutase) transcript levels and may play a role in the response to oxidati…	2	2.63108	0.000535692	2.70173	0.000419518	1.98991	1.30509e-07	3.16435	5.49316e-05	2.87013	0.000177404	-0.153988	0.84432	-0.858719	0.319283	0.0878772	0.737082	-0.677216	0.00353777	-0.148653	0.566889	2.38101	0.0107221	1.1797	0.272324
	AT5G56350	Pyruvate kinase family protein;(source:Araport11)	2	1.91603	3.88579e-05	1.76318	4.6067e-05	1.55146	1.10924e-05	2.14834	5.60798e-06	1.81561	3.10176e-05	0.00318799	0.986792	0.0891744	0.61886	0.349115	0.243079	0.312784	0.224904	0.110777	0.736894	-0.255837	0.0851968	-0.0952585	0.575138
	AT1G09430	Encodes subunit A of the heteromeric enzyme ATP citrate lyase (ACL). In animals, ACL is encoded by a single gene; ACL in Arabidopsis is composed of two polypeptides, ACLA (encoded by 3 genes) and ACLB (encoded by 2 genes). The holoenzyme has an A(4)B(4)stoichiometry. Expression of both ACLA and ACLB but not of either of the subunits alone results in ACL activity.	2	1.77938	0.145992	1.6318	0.178092	0.793892	0.00368463	2.55384	0.0147273	2.33378	0.0250655	-0.920596	7.4086e-05	-0.394488	0.0586241	0.757437	0.00994627	0.386185	0.145071	0.047969	0.892818	-0.288361	0.122035	-0.249369	0.219713
	AT4G15530	Encodes a dual-targeted protein believed to act as a pyruvate, orthophosphate dikinase. These enzymes are normally associated with C4 photosynthesis which does not occur in Arabidopsis. However, PPDK may play a role in remobilizing nitrogen during leaf senescence in Arabidopsis. The product of the long transcript (.1 gene model) was shown to be targeted to the chloroplast, whereas the shorter tra…	2	3.32089	0.00393056	3.17082	0.00542394	2.53206	3.272e-06	1.42003	0.204828	1.29873	0.258497	-1.41998	7.98429e-07	-1.1131	3.51066e-05	2.30703	2.89922e-05	-0.311108	0.435334	-0.26003	0.575357	-0.137868	0.500333	0.0254182	0.920864
	AT1G79550	Encodes cytosolic phosphoglycerate kinase (PGK3). Expression studies in PGK mutants showed that PGK1 and PGK3 were down-regulated in pgk3.2 and pgk1.1, respectively. These results indicate that the down-regulation of photosynthetic activity could be a plant strategy when glycolysis is impaired to achieve metabolic adjustment and optimize growth.	2	1.29675	0.00603005	1.45108	0.00226177	0.61944	0.00784552	0.644276	0.189568	0.39175	0.438753	0.154897	0.352771	-0.0609345	0.757906	0.188456	0.462121	-0.195101	0.41779	0.378289	0.152719	0.0874618	0.591725	0.4175	0.0165724
	AT5G66760	One of two genes in Arabidopsis that encode a flavoprotein subunit of the mitochondrial succinate dehydrogenase complex. The mRNA is cell-to-cell mobile.	2	1.29335	0.00164334	1.4325	0.00058192	0.777888	0.000875195	1.31831	0.00183751	0.750542	0.0459981	0.170289	0.293983	0.0841603	0.652353	0.0166527	0.952499	-0.627747	0.00541318	-0.710001	0.0052037	0.0959825	0.545793	0.251094	0.13296
	AT1G76550	Phosphofructokinase family protein. Target of miRNA sRNA6.	2	1.78414	3.72297e-06	2.1634	4.28771e-07	0.212409	0.677483	1.53043	0.000135369	0.860987	0.00743524	-0.812814	0.0862217	-0.0233523	0.965729	0.0773549	0.903384	-1.00556	0.0752993	-0.229041	0.732241	-0.22431	0.628069	0.413387	0.354046
	AT5G41670	6-phosphogluconate dehydrogenase family protein;(source:Araport11)	2	1.59461	0.000224533	1.72796	7.20924e-05	0.575169	0.0181533	0.715852	0.0640539	0.607416	0.120674	0.501171	0.0414499	0.261544	0.326231	-0.29823	0.268723	-0.999603	0.00153692	-1.65575	0.000127178	-0.388184	0.0970403	-0.524935	0.03966
	AT5G13110	Encodes a plastidic glucose-6-phosphate dehydrogenase that is sensitive to reduction by DTT and whose mRNA is most highly expressed in root.	2	1.10079	0.000136814	0.867131	0.000494112	1.19074	0.00246189	0.663049	0.00501624	0.715446	0.00426944	-0.359095	0.144141	-0.248794	0.358175	0.540306	0.202066	0.637309	0.0425633	0.280033	0.467958	-0.773575	0.00234811	-0.189279	0.478799
	AT2G46505	Encodes succinate dehydrogenase ,a component of mitochondrial respiratory complex II. Nuclear encoded gene which is imported into the mitochondrion.	2	0.535091	0.0671483	0.363582	0.17934	0.26587	0.255521	0.678962	0.0165087	0.596901	0.0362072	-0.178223	0.402772	-0.369539	0.0946548	-0.209162	0.449262	0.285632	0.210233	0.61023	0.0202794	0.120868	0.557521	-0.0559653	0.819101
	AT3G01850	Aldolase-type TIM barrel family protein;(source:Araport11)	2	0.241676	0.52528	-0.109382	0.765733	0.38843	0.355945	0.00579075	0.985682	0.173929	0.592116	-0.131357	0.422026	-0.0534556	0.783795	-0.367683	0.474364	0.245022	0.526124	0.535919	0.20457	0.159938	0.295249	0.0327548	0.862291
	AT5G42740	Sugar isomerase (SIS) family protein;(source:Araport11)	2	0.0408743	0.939974	0.269525	0.570642	0.000171828	0.999474	0.300673	0.596665	0.140924	0.817933	-0.0295016	0.892203	0.161514	0.450971	-0.786073	0.00053156	0.288384	0.116405	0.165042	0.453606	-0.152946	0.419181	0.252022	0.213735
	AT2G20420	ATP citrate lyase (ACL) family protein;(source:Araport11)	2	0.390436	0.15203	0.412674	0.115395	1.22794	1.77622e-06	0.784599	0.00881033	0.78957	0.0105076	0.187061	0.202371	0.227708	0.146199	0.320249	0.0979708	-0.567049	0.00392926	-0.609196	0.0057361	0.678817	5.13547e-05	0.472966	0.0031654
	AT2G22780	encodes an peroxisomal NAD-malate dehydrogenase that is involved in fatty acid beta-oxidation through providing NAD to the process of converting fatty acyl CoA to acetyl CoA.	2	-0.0233218	0.952181	0.0894652	0.801966	0.542147	0.017653	0.921064	0.00643081	0.725858	0.0272036	-0.0198619	0.945507	-0.464824	0.079685	-0.254345	0.32479	-0.181183	0.440952	0.218292	0.411969	1.15991	4.7901e-05	0.925926	0.000951452
	AT2G05710	Encodes an aconitase that can catalyze the conversion of citrate to isocitrate through a cis-aconitate intermediate, indicating that it may participate in the TCA cycle and other primary metabolic pathways. The protein is believed to accumulate in the mitochondria and the cytosol. It affects CSD2 (At2g28190 - a superoxide dismutase) transcript levels and may play a role in the response to oxidati…	2	0.641297	0.63478	0.431803	0.74284	1.09241	0.00162773	1.5237	0.18069	1.20618	0.291412	0.721272	0.000120713	0.263668	0.123752	-0.860512	0.0124176	-1.02471	0.00286539	-0.467024	0.194288	1.11197	3.16605e-07	0.65822	0.000376155
	AT3G58750	Encodes a peroxisomal citrate synthase that is expressed throughout seedling and shoot development.	2	1.04597	0.0193835	0.962228	0.0229994	-0.177173	0.591352	2.3472	1.43363e-06	1.59471	3.82937e-05	-0.643877	0.000690047	-0.471596	0.0122018	-0.138784	0.714309	-1.18878	0.000275507	-0.518995	0.0979582	1.00674	2.79629e-06	0.64544	0.000825644
	AT3G52990	Pyruvate kinase family protein;(source:Araport11)	2	-0.17717	0.876093	0.260511	0.816347	-0.0141021	0.944673	0.286848	0.771354	0.210077	0.840954	1.52376	2.20843e-06	0.877432	0.00139784	-0.804607	0.000328051	0.931932	3.78889e-05	1.07569	2.00971e-05	1.4951	1.24246e-06	1.54218	1.67192e-06
	AT5G08570	Pyruvate kinase family protein;(source:Araport11)	2	-0.412116	0.0735209	-0.110413	0.652604	-0.694477	0.018933	-0.583644	0.0425681	-0.571021	0.0542042	0.852348	0.00126194	0.478486	0.065162	-0.40826	0.194739	1.15953	0.00140112	0.779324	0.0402191	1.54552	1.1068e-06	1.14664	9.03147e-05
	AT5G23250	Succinyl-CoA ligase, alpha subunit;(source:Araport11)	2	0.394305	0.148567	0.442788	0.0901504	0.543595	0.0302667	-0.64093	0.0341005	-0.457788	0.144677	0.611185	0.00446267	0.447716	0.041047	0.190499	0.521826	0.942585	0.00151151	0.463587	0.150275	1.1158	7.14163e-06	0.696995	0.00198616
	AT1G54220	Encodes a subunit of the mitochondrial pyruvate dehydrogenase complex.	2	-0.79145	0.000297707	-0.491273	0.0113878	-0.780763	0.018676	0.2773	0.160776	-0.152709	0.436952	0.542962	0.0031265	0.368564	0.0468265	-0.740006	0.0377938	0.327158	0.394453	0.713763	0.0928333	0.704005	0.000220055	0.395464	0.0297378
	AT5G50850	Transketolase family protein;(source:Araport11)	2	0.361863	0.269705	0.402309	0.201611	0.182653	0.3529	0.511921	0.118998	0.350755	0.296022	1.94761	0.00465295	1.71938	0.0156067	-0.466092	0.0332158	0.0662445	0.761162	-0.140976	0.562946	1.07489	0.0540753	0.677062	0.276504
	AT3G47520	Encodes a protein with NAD-dependent malate dehydrogenase activity, located in chloroplasts. The mRNA is cell-to-cell mobile.	2	0.694452	0.0494036	0.800027	0.0217357	0.240615	0.249061	0.770203	0.0486588	0.582061	0.136358	1.44103	1.51729e-05	0.866006	0.003731	-0.0161755	0.953936	0.621395	0.0108882	0.383839	0.156458	-0.21496	0.407831	-0.0398964	0.902015
	AT1G53310	Encodes one of four Arabidopsis phosphoenolpyruvate carboxylase proteins.Plays an important role in carbon and nitrogen metabolism.	2	1.72559	0.0963755	1.88842	0.0652282	1.57947	3.01733e-06	2.23013	0.0365457	2.4978	0.0289854	1.26701	2.1463e-06	0.302356	0.152697	0.10065	0.723683	1.10546	0.000128493	0.597431	0.026242	-0.768762	0.000380237	-0.182421	0.391885
	AT4G00570	Encodes an NAD-dependent malic enzyme (NAD-ME) that does not act on oxaloacetate, indicating that it belongs to EC 1.1.1.39. It is a member of the beta family of NAD-MEs in plants. It appears to function as a homodimer or as a heterodimer with the alpha-type NAD-ME2 (At2g13560). NAD-ME2 transcript and protein levels are higher during the night than during the day.	2	1.63353	2.80359e-05	1.53825	2.72591e-05	0.838422	0.000248217	1.46879	0.000114746	1.5487	0.00010843	2.63379	7.29604e-06	1.01068	0.0415129	-0.299742	0.164591	0.441831	0.03187	0.233304	0.320373	-0.636142	0.122695	0.188682	0.693607
	AT2G36530	Involved in light-dependent cold tolerance and encodes an enolase. Protein is tyrosine-phosphorylated and its phosphorylation state is modulated in response to ABA in Arabidopsis thaliana seeds. Affects seed size and weight by adjusting cytokinin content and forming ENO2-bZIP75 complex.	2	1.22668	0.196987	1.31781	0.164378	0.883177	0.0017944	0.804271	0.417237	0.735513	0.476453	-0.234629	0.498767	-0.0735447	0.855643	-0.507791	0.0662612	1.33037	4.80691e-05	0.544796	0.0579262	-3.33605	6.15488e-11	-1.38415	3.0098e-05
	AT1G13700	Encodes a cytosolic 6-phosphogluconolactonase (PGL) thought to be involved in the oxidative pentose-phosphate pathway (OPPP).	2	0.434342	0.0645774	0.203324	0.3496	-1.72994	0.131893	3.48125	2.39746e-10	3.49451	4.34946e-10	-0.694081	0.182778	-0.376139	0.521843	0.751457	0.354449	-0.508812	0.20447	0.599596	0.161024	-1.92302	0.000571462	-0.814777	0.130459
	AT4G13430	Encodes a methylthioalkylmalate isomerase involved in glucosinolate biosynthesis.	3	-0.21859	0.709289	0.141372	0.815833	-0.176323	0.598109	-0.00814871	0.99122	-0.247628	0.724806	2.45247	5.32047e-08	2.22535	5.74953e-07	0.317291	0.377436	-0.193101	0.552078	-0.305845	0.394346	4.87301	5.94226e-13	3.72553	7.08004e-11
	AT5G49460	One of the two genes encoding subunit B of the cytosolic enzyme ATP Citrate Lyase (ACL)	3	-0.0397626	0.890874	0.321495	0.207736	-0.663757	0.0217118	-0.735252	0.00698567	-1.13877	0.00017332	0.731665	0.00536338	0.426131	0.111073	-0.795406	0.0138414	-0.0583025	0.851443	-0.205589	0.550247	3.56174	7.12328e-12	1.72212	6.76024e-07
	AT1G60810	One of the three genes encoding subunit A of the trimeric enzyme ATP Citrate lyase	3	-1.14164	0.0230851	-0.927146	0.0645387	-1.19852	0.0247909	-1.25163	0.0106273	-1.60297	0.00256062	1.27359	0.00134073	0.938566	0.018107	-1.78234	0.00865401	0.259443	0.692968	-0.186804	0.833869	4.97364	1.93779e-11	2.35404	2.37872e-06
	AT1G17650	Glyoxylate reductase located in chloroplasts.	1	-1.19268	0.0550503	-0.312941	0.660377	-2.71964	0.00015475	-5.04139	3.16368e-07	-4.11266	2.34558e-06	-0.385939	0.105294	-0.313888	0.220799	-2.43963	0.000507947	0.346538	0.466379	-0.248238	0.691353	-0.405339	0.075369	-0.403363	0.101178
	AT5G14740	Encodes a beta carbonic anhydrase likely to be localized in the cytoplasm. Expression of its mRNA is seen in etiolated seedlings and points to a possible nonphotosynthetic role for this isoform.	1	-1.04515	0.574744	-1.03131	0.570005	-3.58994	3.29168e-05	-4.42983	0.0100054	-3.41467	0.0608658	0.160887	0.471155	0.205494	0.387221	-1.79727	0.0228811	-1.36631	0.0532244	-0.428532	0.622208	-0.917149	0.000144207	-0.472481	0.0378109
	AT1G71180	6-phosphogluconate dehydrogenase family protein;(source:Araport11)	1	-2.24057	1.73382e-05	-1.97012	6.52382e-05	-0.260935	0.319047	-2.53748	2.78294e-06	-1.95123	3.38069e-05	-0.478851	0.168034	-0.846913	0.0261195	-0.131251	0.671244	-1.96346	1.33751e-06	-2.35548	2.09722e-06	0.564819	0.0973769	-0.263813	0.52052
	AT5G35790	Encodes a plastidic glucose-6-phosphate dehydrogenase that is sensitive to reduction by DTT and whose mRNA is more prevalent in developing organs but absent in the root.	1	-3.33403	0.000140707	-3.13467	0.000244637	-2.00939	1.77403e-05	-2.21996	0.00778533	-2.06009	0.0157676	-2.09967	1.37335e-07	-1.55192	1.28399e-05	-0.0892822	0.845702	-0.791649	0.0309544	-0.426287	0.302128	0.177341	0.489753	-0.0976688	0.742747
	AT1G70820	phosphoglucomutase, putative / glucose phosphomutase;(source:Araport11)	1	-2.78426	0.000550851	-3.17087	0.000123504	-1.38168	0.000146597	-3.59473	3.86766e-05	-2.47557	0.00264735	-2.7083	3.54218e-08	-1.96643	3.28143e-06	-0.570511	0.0936158	-2.42765	3.70032e-07	-1.82192	2.45084e-05	-1.81908	1.43556e-06	-0.99378	0.00225537
	AT1G08650	Encodes a phosphoenolpyruvate carboxylase kinase that is expressed at highest levels in leaves. Expression is induced by light. The mRNA is cell-to-cell mobile.	1	-0.663345	0.481214	-0.31759	0.749909	-0.321347	0.502127	-1.49877	0.0868552	-1.15571	0.213361	1.20762	0.000536343	0.398136	0.238747	0.258209	0.643313	-0.124321	0.811656	0.29657	0.603538	-3.16556	1.27613e-09	-3.39907	1.07676e-09
	AT1G48030	Encodes a mitochondrial lipoamide dehydrogenase whose expression is induced by light.	1	-0.933007	0.00396206	-0.777347	0.011964	-1.5056	3.82953e-06	-1.43716	0.000156806	-1.46941	0.000164775	0.839383	0.000106202	0.505691	0.0122641	-0.462996	0.0744742	-2.22044	3.54421e-08	-1.74005	1.9001e-06	-0.0118139	0.951825	-0.244128	0.206108
	AT3G22960	encodes a chloroplast pyruvate kinase alpha subunit. Important for seed oil biosynthesis. Ubiquitously expressed, with significantly increased expression in maturing seeds. The mRNA is cell-to-cell mobile.	1	-0.875017	0.101547	-0.266675	0.648527	-1.08744	1.10055e-05	-1.4399	0.00692021	-1.07375	0.0482479	0.541516	0.00446705	0.114994	0.579926	-0.808526	0.000541321	-0.605238	0.00352003	-0.49071	0.0248856	0.611432	0.00119216	1.10332	3.55808e-06
	AT1G12230	Aldolase superfamily protein;(source:Araport11)	1	-0.853568	0.00433478	-0.463066	0.100647	-1.20662	0.000698586	-0.493581	0.0712722	-0.43129	0.130205	0.0517948	0.792626	-0.305025	0.109022	-0.821512	0.0159011	-1.50357	8.27563e-05	-0.279312	0.405392	-0.00820053	0.965064	0.159841	0.400805
	AT5G51820	Encodes a plastid isoform of the enzyme phosphoglucomutase involved in controlling photosynthetic carbon flow. Effective petiole movement against the direction of the gravity requires functional PGM activity that is required for full development of amyloplasts.	1	-2.42151	0.000204329	-1.45873	0.0147559	-1.82957	9.81911e-06	-2.5061	0.00022417	-2.08615	0.001847	-0.443925	0.0430741	-0.283721	0.226949	-1.45928	0.000269109	0.312116	0.321422	0.32761	0.364355	-1.09993	1.90314e-05	-0.90412	0.000339373
	AT5G17310	UDP-glucose pyrophosphorylase 2;(source:Araport11)	1	-0.179005	0.623106	0.189866	0.604456	-1.1738	0.00037391	-2.71258	2.04858e-06	-2.22186	3.56716e-05	0.113901	0.643735	0.100033	0.715205	-0.425815	0.137841	0.217656	0.468302	0.534478	0.10427	-1.04176	8.40787e-05	0.047657	0.865219
	AT1G01090	pyruvate dehydrogenase E1 alpha subunit	1	-0.577758	0.126256	0.0845794	0.849099	-1.25194	7.99409e-06	-1.28998	0.00307878	-1.22948	0.0055466	-0.440764	0.168846	-0.705027	0.0417378	-0.273599	0.226188	0.100517	0.648659	-0.197577	0.411921	-1.87871	3.75503e-06	-1.1121	0.000913709
	AT1G53240	mMDH1 encodes a mitochrondrial malate dehydrogenase. It is expressed at higher levels than the other mitochrondrial isoform mMDH2 (At3G15020) according to transcript and proteomic analyses.	1	-0.724007	0.0163537	-0.387622	0.185767	-0.491878	0.066152	-1.29274	0.00342542	-1.24042	0.00572652	0.0219595	0.903505	-0.0198216	0.924706	-0.453035	0.122877	0.146308	0.636412	0.607904	0.0650679	-0.369863	0.0186909	0.0868099	0.626052
	AT1G70730	Encodes a cytosolic phosphoglucomutase (PGM). Two Arabidopsis PGM proteins (AT1G70730/PGM2 and AT1G23190/PGM3) have high sequence similarities and redundant functions. Mature plants possessing a single cPGM allele had a major reduction in cPGM activity. Whereas pgm2 and pgm3 single mutants are undistinguishable from the wild type, loss of both PGM2 and PGM3 severely impairs male and female gameto…	1	-1.42644	0.000157964	-0.953409	0.00509066	-0.72654	0.0075884	-1.16006	0.0051277	-0.961835	0.0215881	-0.642545	0.00501811	-0.750574	0.00244536	0.220642	0.46526	-0.00621318	0.984053	0.150152	0.644734	-0.926668	0.000150184	-0.0395179	0.881985
	AT3G25530	Encodes gamma-hydroxybutyrate dehydrogenase (AtGHBDH). Contains a NADP-binding domain. GHBDH is proposed to function in oxidative stress tolerance.	1	-1.70774	1.51684e-05	-1.05754	0.00175974	-1.00711	0.00143379	-1.49468	4.64341e-05	-1.0038	0.00340584	-0.247536	0.36479	-0.478215	0.0932168	-0.580423	0.0625152	0.130786	0.668582	-0.0904087	0.811262	-0.667093	0.0115662	-0.37143	0.180698
	AT3G08590	Encodes a 2,3-biphosphoglycerate-independent phosphoglycerate mutase that is involved in pollen development and stomatal movement.	1	-0.246672	0.310466	0.306896	0.215582	0.792025	0.000797315	-0.391112	0.22251	-0.23824	0.494078	-1.81024	0.0177763	-0.350507	0.578231	0.413548	0.0748127	-1.00038	0.000243814	-0.202875	0.441651	-2.41552	0.00043038	-0.802899	0.103822
	AT3G14940	Encodes a cytosolic phosphoenolpyruvate carboxylase (PEPC) that has activity when expressed in E.coli. Its mRNA is most abundantly expressed in roots and siliques. PPC3 belongs to the plant-type PEPC family. It can form an enzymatically active complex with a castor bean ortholog of PPC4, which encodes a bacterial-type PEPC. The mRNA is cell-to-cell mobile.	1	-0.300463	0.446147	0.8173	0.050073	-1.61426	0.00677579	-0.552419	0.146496	-0.226411	0.595464	-1.24915	0.0131219	-0.591455	0.186421	-0.480356	0.334198	-1.64859	0.0118729	-0.343922	0.57949	-0.969267	0.00427106	-0.619418	0.0730581
	AT4G33580	beta carbonic anhydrase 5;(source:Araport11)	1	-0.827019	0.00259705	-0.4715	0.0655152	-0.956122	0.0033748	-1.4888	4.4399e-05	-1.29017	0.000306384	-2.57884	1.89975e-07	-1.40406	0.000405526	-0.358302	0.244513	0.253812	0.344678	0.219307	0.494181	1.19804	0.000587165	1.05218	0.00326019
	AT3G16950	encodes a plastid lipoamide dehydrogenase, subunit of the pyruvate dehydrogenase complex which provides acetyl-CoA for de novo fatty acid biosynthesis. The gene is highly expressed in developing seeds.	1	-1.1015	0.0064256	-0.163265	0.716825	-1.8128	0.00457393	-1.8799	0.000180558	-1.20052	0.0134468	-3.06282	2.18203e-05	-1.94656	0.00217137	0.644776	0.141678	-0.319124	0.308896	-0.846173	0.0264592	-0.783431	0.141223	-0.141156	0.827814
	AT2G24270	Encodes a protein with non-phosphorylating NADP-dependent glyceraldehyde-3-phosphate dehydrogenase activity. The activity of the enzyme was determined from leaf extracts; the enzyme has not been purified to confirm activity.	1	-1.46106	0.0231104	-1.29399	0.0398907	-1.13459	0.00110997	-2.4529	0.00687039	-1.81761	0.0510689	-1.75979	6.48027e-07	-0.877513	0.00209831	0.0527941	0.902526	-1.65595	3.6967e-05	-0.514147	0.155841	-1.85202	1.71876e-07	-0.40112	0.133569
	AT1G07110	Encodes the bifunctional enzyme fructose-6-phosphate 2-kinase/fructose-2,6-bisphosphatase.	1	-1.07318	0.00261816	-0.685173	0.0408429	-1.54778	2.95568e-06	-0.878526	0.00635038	-0.730745	0.025492	-0.875898	0.000148812	-0.406003	0.0570354	-1.43961	2.20264e-05	-1.21684	3.47568e-05	-0.66203	0.0136214	-1.37206	4.85502e-07	-0.647783	0.00382109
	AT5G47810	phosphofructokinase 2;(source:Araport11)	1	-1.34009	0.00105593	-1.63091	0.000307575	-0.726377	0.2595	-0.845064	0.0172972	-0.82081	0.0219942	-1.30187	0.198076	-0.909712	0.373335	-0.7904	0.273599	-1.67178	0.00209711	-0.899243	0.0805452	-0.788059	0.552895	-0.296569	0.83564
	AT5G43330	predicted to encode a cytosolic malate dehydrogenase. The mRNA is cell-to-cell mobile.	1	-0.901169	0.0105519	-0.433358	0.205927	-0.31269	0.442358	-2.1894	1.00165e-05	-1.93483	5.37065e-05	-0.334509	0.0717336	-0.313903	0.112427	-0.40181	0.371266	-0.775352	0.065383	-0.537725	0.269957	-0.609694	0.00159697	0.217758	0.264641
	AT1G34430	2-oxoacid dehydrogenases acyltransferase family protein;(source:Araport11)	1	-1.77087	4.29465e-07	-1.00728	0.000209088	-1.17318	0.000290245	-1.91074	2.34565e-07	-1.5427	5.10648e-06	-0.558268	0.00444499	-0.447305	0.0263025	-0.586539	0.0420975	-1.03177	0.00063098	-1.18054	0.000742463	0.0119813	0.951543	0.0656535	0.758084
	AT5G58330	lactate/malate dehydrogenase family protein;(source:Araport11)	1	-1.23868	0.0696391	-0.798891	0.247427	-1.25586	2.40483e-05	-1.50047	0.0522225	-1.22367	0.128761	-1.32734	5.14877e-07	-1.08215	1.51539e-05	-0.167118	0.550181	-0.339785	0.150734	0.195644	0.484222	0.0168156	0.932462	0.149666	0.456946
	AT5G22620	encodes a putative 2-carboxy-D-arabinitol 1-phosphate phosphatase	1	-0.737108	0.0520351	-0.553369	0.137357	-0.949489	5.49606e-05	-2.05172	1.03238e-05	-1.8616	4.65415e-05	-1.09818	2.89897e-05	-1.16623	3.51066e-05	-1.10069	4.35934e-05	-0.412571	0.0393412	-0.229466	0.316871	-0.696866	0.00183236	-0.759537	0.00161776
Major carbohydrate metabolism	AT2G31390	Encodes a member of the fructokinase gene family. Nomenclature according to Riggs 2017 has been adopted for the family by the community (personal communication, Boernke, Callis, Granot, Boernke, and Smeekens).	3	1.50293	2.2865e-05	1.49339	1.2407e-05	1.84604	1.85407e-05	0.774809	0.00564776	0.44055	0.0891665	-0.56929	0.0141514	-0.335845	0.166639	0.480629	0.226251	0.247597	0.531667	0.608447	0.154214	2.2561	1.18546e-09	1.5208	8.08379e-07
	AT4G34860	Plant neutral invertase family protein;(source:Araport11)	3	-1.131	0.256151	0.0380771	0.968755	3.06833	0.154909	1.24351	0.0937137	1.08807	0.151527	-0.348847	0.0370522	-0.262902	0.13791	0.699858	0.830791	0.108928	0.951683	0.685101	0.709059	1.40833	1.40126e-08	0.651034	0.000519153
	AT4G24040	Encodes a trehalase, member of Glycoside Hydrolase Family 37.	3	0.944067	0.0596441	1.047	0.0321339	2.15913	0.000543326	3.08623	1.48228e-07	2.46599	6.79077e-07	-0.857815	0.000516475	-0.398087	0.0912608	-0.0146684	0.986158	-0.494924	0.0966159	-0.189665	0.6024	0.497205	0.0211376	0.000737435	0.997891
	AT1G77130	Encodes a glucuronyltransferase responsible for the addition of GlcA residues onto xylan and for secondary wall deposition.	3	-0.109635	0.75048	-0.345384	0.243024	-0.125923	0.662446	0.848073	0.0102525	0.729564	0.0269854	0.654607	0.000898669	0.48463	0.0134748	-0.134785	0.676966	-0.069322	0.80876	0.196854	0.52179	0.545907	0.00294031	0.300517	0.106657
	AT1G56560	A/N-InvA is a neutral invertase that breaks sucrose down into fructose and glucose. It is member of the larger family of alkaline/neutral invertases (GH100). GFP-tagged A/N-InvA localizes to the mitochondria. atinva mutants have reduced root growth, reduced invertase activity, and increased expression of antioxidant genes under basal conditions. The levels of A/N-InvA transcripts rise in response…	3	0.33351	0.189763	-0.0104376	0.969009	0.275967	0.319463	0.499466	0.041924	0.555302	0.0315783	-1.157	2.98754e-05	-0.81697	0.00168755	0.361113	0.228034	0.381564	0.152343	0.305669	0.331047	0.590998	0.00869433	0.757832	0.00240651
	AT2G18700	Encodes an enzyme putatively involved in trehalose biosynthesis. The protein has a trehalose synthase (TPS)-like domain that may or may not be active as well as a trehalose phosphatase (TPP)-like domain.	3	-0.312379	0.790439	-0.12792	0.915147	0.0252816	0.957492	1.13086	0.160993	1.06599	0.200243	-0.383084	0.184409	-0.0838612	0.814418	0.341429	0.467702	-1.91924	0.000205929	-1.18444	0.0192998	2.63285	4.74591e-09	1.75254	3.14766e-06
	AT1G06410	Encodes an enzyme putatively involved in trehalose biosynthesis. Though the protein has both trehalose-6-phosphate synthase (TPS)-like and trehalose-6-phosphate phosphatase (TPP)-like domains, neither activity has been detected in enzymatic assays nor has the protein been able to complement yeast TPS or TPP mutants.	3	0.405658	0.451498	0.332	0.518842	-0.0540121	0.79079	0.208268	0.647945	0.227208	0.637781	-0.242464	0.317254	0.151199	0.582933	0.833182	0.000412016	-2.27918	1.48396e-09	-1.71344	1.66743e-07	1.3329	4.98847e-06	1.69247	4.16225e-07
	AT5G20250	encodes a member of glycosyl hydrolase family 36. Expression is induced within 3 hours of dark treatment, in senescing leaves and treatment with exogenous photosynthesis inhibitor. Induction of gene expression was suppressed in excised leaves supplied with sugar. The authors suggest that the gene's expression pattern is responding to the level of sugar in the cell. The mRNA is cell-to-cell mobile.	3	0.95483	0.74817	0.481226	0.876872	-0.655954	0.115402	4.24938	0.0308338	2.87116	0.0769116	-0.368495	0.297473	-0.016322	0.971855	0.0744588	0.888516	-1.33807	0.00601541	-0.960619	0.0644776	2.15526	9.54783e-07	2.58442	1.62091e-07
	AT1G60140	Encodes an enzyme putatively involved in trehalose biosynthesis. The protein has a trehalose synthase (TPS)-like domain that may or may not be active as well as a trehalose phosphatase (TPP)-like domain.	3	-0.776921	0.426611	-0.396112	0.702008	-0.0285288	0.930743	3.21982	2.71027e-05	2.33905	0.000181177	-0.107812	0.62392	-0.156445	0.499994	0.136405	0.690219	-1.832	4.72869e-06	-1.21664	0.000838113	1.38949	3.79286e-07	0.971544	7.27616e-05
	AT4G22590	Haloacid dehalogenase-like hydrolase (HAD) superfamily protein;(source:Araport11)	3	3.87892	4.35038e-07	4.87553	1.76425e-07	1.90824	4.2063e-05	2.37799	9.03393e-05	1.79728	0.000572252	-0.234363	0.36479	-0.418743	0.120135	-0.0866399	0.880695	-0.273601	0.650557	0.0723996	0.9266	0.814087	0.00222985	0.59551	0.0289753
	AT3G06500	Encodes an alkaline/neutral invertase which localizes in mitochondria. It may be modulating hormone balance in relation to the radicle emergence. Mutants display severely reduced shoot growth and reduced oxygen consumption. Mutant root development is not affected as reported for A/N-InvA mutant (inva) plants. The mRNA is cell-to-cell mobile.	3	2.42412	0.00531642	3.07581	0.0013677	-0.219553	0.527996	1.94594	0.00716897	1.43401	0.0321032	-0.620433	0.0135307	-0.394604	0.131586	-0.080093	0.852893	-2.13968	5.38048e-06	-1.18849	0.00281603	-0.12689	0.598295	-0.264899	0.296366
	AT1G76130	alpha-amylase, putative / 1,4-alpha-D-glucan glucanohydrolase, putative, strong similarity to alpha-amylase GI:7532799 from (Malus x domestica);contains Pfam profile PF00128: Alpha amylase, catalytic domain. Predicted to be secreted based on SignalP analysis.	3	1.61592	0.000232592	1.6726	0.000113435	0.773383	0.0597449	-0.25631	0.532107	0.115272	0.808779	0.437216	0.0817757	0.0429013	0.894538	1.23695	0.00749712	0.137454	0.711447	0.6299	0.105665	-0.610456	0.0135029	-0.0864477	0.763563
	AT5G65140	Haloacid dehalogenase-like hydrolase (HAD) superfamily protein;(source:Araport11)	3	2.09984	5.0332e-06	2.46649	8.74489e-07	1.40743	0.0763304	-0.717877	0.0169663	-0.0614855	0.868143	-1.35561	1.35413e-05	-1.55518	7.29523e-06	1.43238	0.0991467	0.62597	0.448382	0.0389937	0.976991	-0.351935	0.134894	0.773131	0.00408489
	AT3G28340	Encodes a protein with putative galacturonosyltransferase activity.	4	3.79121	3.49889e-05	3.98812	1.42275e-05	3.89072	4.5554e-05	5.25588	2.01983e-07	5.21687	3.46969e-07	0.427909	0.30896	0.82001	0.0630341	0.149963	0.908684	2.15466	0.000181787	0.468509	0.46936	1.79878	0.000135773	2.96889	5.59467e-07
	AT3G13790	Encodes a protein with invertase activity.	4	3.86933	4.58844e-05	4.13559	2.23867e-05	4.56372	1.76487e-06	6.67395	3.74527e-08	6.2746	9.3466e-08	-1.21319	6.786e-07	-0.623002	0.0016817	2.85913	0.000465991	0.626268	0.215746	0.436646	0.457025	0.796403	5.49357e-05	0.700921	0.000423828
	AT1G47840	Encodes a putative hexokinase.	5	0.211534	0.732718	-1.02918	0.0984813	1.04829	0.395705	4.73512	0.000380175	4.60569	0.000575225	-2.03197	0.00259616	-0.596878	0.221989	-2.23473	0.293792	4.41688	0.0272374	2.51375	0.289949	-0.514589	0.340365	0.164407	0.767989
	AT1G56600	GolS2 is a galactinol synthase that catalyzes the formation of galactinol from UDP-galactose and myo-inositol. GolS2 transcript levels rise in response to methyl viologen, an oxidative damage-inducing agent. Plants over-expressing GolS2 have increased tolerance to salt, chilling, and high-light stress.	1	-2.25242	0.0033163	-1.51255	0.0316869	1.84036	0.0120529	-4.8516	0.000219866	-3.3774	0.00446818	-1.11153	0.00035064	-0.530384	0.0675598	1.40206	0.075324	-1.54896	0.0221976	-0.950606	0.193557	1.75318	8.42634e-07	1.01875	0.000889439
	AT1G32900	UDP-Glycosyltransferase superfamily protein;(source:Araport11)	1	-0.537522	0.255909	-0.869433	0.0858635	0.787659	0.298948	-3.62826	0.0123642	-2.21319	0.156037	-1.45263	6.46721e-05	-0.746647	0.0185816	2.96621	0.00046204	-0.968522	0.270991	-2.26659	0.133485	-1.75364	1.94293e-06	-1.14848	0.000466337
	AT5G18670	putative beta-amylase BMY3 (BMY3)	1	-0.463194	0.331066	0.261108	0.622531	-1.33055	0.124583	-1.69003	0.00848568	-1.60008	0.0153569	-1.63552	9.02801e-05	-0.992364	0.00734916	0.990132	0.121017	-1.63779	0.000117589	-0.385098	0.275337	-2.20784	7.03795e-07	-1.13263	0.00162153
	AT5G01260	Carbohydrate-binding-like fold;(source:Araport11)	1	-1.5431	0.000457354	-0.673952	0.0869765	-1.29748	0.00472906	-2.96341	2.0262e-05	-2.01885	0.001639	-1.48045	0.000122352	-1.41154	0.000216299	0.418931	0.275318	0.980818	0.00864054	0.178478	0.708963	-2.06508	1.06835e-08	-1.29422	1.0233e-05
	AT4G10120	Encodes a protein with putative sucrose-phosphate synthase activity.	1	-2.97807	0.00237767	-3.78809	0.000244642	-1.27619	0.00763081	-3.76267	0.000908058	-2.86235	0.0114703	-2.45386	4.87042e-08	-1.71072	9.25442e-06	-0.074735	0.902987	-1.72109	0.000918426	-0.534187	0.311638	-2.99885	5.98955e-10	-0.742102	0.0150635
	AT2G39930	Encodes an isoamylase-type debranching enzyme. Mutations in this gene cause the loss of detectable isoamylase activity and the disruption of normal starch structure. Mutants have reduced starch content and abnormally structured amylopectins and phytoglycogens. It has been postulated that AtISA1 interacts with AtISA2 to form the Iso1 complex.	1	-3.85194	0.000379467	-3.51238	0.000885347	-1.22399	0.000336214	-3.77583	0.000260178	-2.95723	0.00352093	-1.65766	0.000166436	-0.189601	0.636542	-0.0564115	0.882692	-1.18382	0.000414513	-0.324845	0.331047	-0.0247281	0.94523	-0.26328	0.464979
	AT4G17770	Encodes an enzyme putatively involved in trehalose biosynthesis. The protein has a trehalose synthase (TPS)-like domain that may or may not be active as well as a trehalose phosphatase (TPP)-like domain. Phosphorylated TPS5 extracted from Arabidopsis cells binds directly to 14-3-3 isoforms. The mRNA is cell-to-cell mobile.	1	-2.59013	0.00035227	-3.2646	8.38279e-05	-0.923875	0.0751727	-4.24992	2.18392e-05	-3.21996	0.000345311	-0.518992	0.165974	-0.0621003	0.895596	-0.578924	0.301973	-1.15511	0.079125	0.0200687	0.981033	-2.02258	1.31298e-05	-0.768094	0.0406005
	AT3G46970	Encodes a cytosolic alpha-glucan phosphorylase. In vitro, the enzyme has a preference for branched polysaccharides, such as glycogen.	1	-4.21777	0.00321213	-2.84391	0.0437728	-1.23768	0.000479006	-2.71836	0.0206867	-2.06396	0.0940613	-1.35094	0.000419837	-0.916816	0.0133166	-1.45872	0.000285521	0.0343095	0.921584	0.213831	0.551306	-0.795756	0.0179127	-0.170147	0.657212
	AT1G03310	Encodes a protein with strong similarity to isoamylase (EC:3.2.1.68) however lacks critical residues known to be important for activity. Appears to co localize with ISA1 in the chloroplast isoamylase complex. Mutations in this gene cause the loss of detectable isoamylase activity and the disruption of normal starch structure. It has been postulated that AtISA2 interacts with AtISA1 to form the Is…	1	-4.80052	0.000203525	-3.89028	0.00119991	-2.13157	0.00016688	-2.59621	0.0131579	-1.95413	0.0727299	-0.93387	0.00369805	-0.392564	0.219854	-0.757623	0.119592	-0.952326	0.0515113	-0.11219	0.859945	-1.45907	2.25426e-05	-0.684242	0.0257294
	AT5G64860	Encodes a maltotriose-metabolizing enzyme with chloroplastic &#945;-1,4-glucanotransferase activity. Mutant has altered starch degradation.	1	-3.74319	7.77917e-06	-2.33704	0.00112889	-2.27808	9.18747e-06	-2.22531	4.25423e-06	-2.68933	6.33467e-07	-0.143498	0.65628	-0.0770479	0.83482	-1.44895	0.00100514	-0.913708	0.0134551	-0.337174	0.413552	-1.36567	2.57517e-05	-0.767933	0.0075369
	AT3G29320	Encodes a plastidic alpha-glucan phosphorylase. In vitro, the enzyme has a preference for maltooligosaccharides, such as maltoheptaose. The mRNA is cell-to-cell mobile.	1	-3.53289	0.000934776	-2.26078	0.027243	-1.79602	0.000551578	-2.73088	0.00264406	-2.76802	0.00287503	-0.757954	0.0494088	-0.839186	0.0392139	-1.52597	0.00468726	-0.822288	0.0714895	-0.117401	0.847758	-1.62612	0.000108553	-1.61555	0.000208635
	AT1G35910	Haloacid dehalogenase-like hydrolase (HAD) superfamily protein;(source:Araport11)	2	1.90546	0.363059	2.80852	0.14476	0.586588	0.562466	-4.32545	0.00048478	-1.47854	0.0101976	-0.212472	0.730061	-1.34714	0.0477263	-2.19714	0.176964	0.167228	0.911269	-3.26131	0.170935	0.879792	0.0694937	-0.0873054	0.890196
	AT2G47180	GolS1 is a galactinol synthase that catalyzes the formation of galactinol from UDP-galactose and myo-inositol. GolS1 transcript levels rise in response to methyl viologen, an oxidative damage-inducing agent. Plants over-expressing GolS1 have increased tolerance to salt, chilling, and high-light stress.	2	-0.0895031	0.841677	1.01313	0.0252166	0.182572	0.778076	-1.86587	0.0126441	-2.21526	0.00416102	1.93292	2.06216e-05	1.07664	0.00791425	0.759847	0.197713	-0.991496	0.0145147	-1.24713	0.0115836	1.65529	7.13109e-05	1.00593	0.0103886
	AT3G23920	Encodes a chloroplast beta-amylase. Is necessary for leaf starch breakdown in the absence of BAM3.Activity of BAM1 increases 4 days after osmotic stress. BAM1 has a higher temperature optimum than BAM3 (PMID:25293962).	2	0.823713	0.305123	1.18327	0.139348	-0.169182	0.667397	-0.178489	0.814917	-0.545236	0.452447	-0.606775	0.0136652	-0.393325	0.122272	0.654253	0.0968357	-2.99545	2.67101e-07	-1.27824	0.00349594	-0.9539	0.000245997	-0.625516	0.0133928
	AT4G02280	Encodes a protein with sucrose synthase activity (SUS3). It appears to be important for sucrose metabolism in developing seeds, especially during the late maturation phase, about 18 days after flowering.	2	-0.397909	0.746689	-0.0361804	0.978195	0.258186	0.706497	-0.590413	0.577367	-0.832869	0.440634	0.833219	0.150892	0.481707	0.463739	-0.658282	0.415029	-1.23955	0.0280332	-1.26106	0.0602277	-1.47246	0.000940288	-0.19693	0.649958
	AT3G18660	Plants expressing an RNAi construct specifically targeting PGSIP1 was shown to have a dramatically reduced amount of starch. Encodes a glucuronyltransferase responsible for the addition of GlcA residues onto xylan and for secondary wall deposition.	2	-2.058	0.000561321	-0.312303	0.426158	-1.45554	0.236136	1.00775	0.016301	0.471337	0.275834	-1.13519	0.0838732	-1.50454	0.0396491	-6.1674	0.00500425	-1.12307	0.168448	-0.121484	0.902435	0.578878	0.446129	-1.854	0.111445
	AT4G15210	cytosolic beta-amylase expressed in rosette leaves and inducible by sugar. RAM1 mutants have reduced beta amylase in leaves and stems.	2	-0.874758	0.416362	-0.718373	0.513567	-4.14499	0.205499	-1.5001	0.145846	-1.94691	0.0713683	0.0961111	0.917999	-1.03987	0.324148	-1.22456	0.586114	2.76453	0.129964	-2.41663	0.526685	-2.63063	4.30365e-05	-1.62218	0.00638036
	AT4G39210	Encodes the large subunit of ADP-Glucose Pyrophosphorylase which catalyzes the first, rate limiting step in starch biosynthesis. The large subunit plays a regulatory role whereas the small subunit (ApS) is the catalytic isoform. Four isoforms (ApL1-4) have been identified. ApL3 is the major large subunit isoform present in inflorescences, fruits and roots.	2	-1.82185	5.4117e-05	-1.34042	0.00105337	0.877354	0.0373131	-0.5526	0.241141	-0.0374982	0.949972	-1.31455	9.46644e-05	-0.910509	0.00298411	0.478937	0.311466	0.962327	0.0410936	0.647288	0.234322	-0.694107	0.00833086	-0.357408	0.184114
	AT5G16150	Encodes a putative plastidic glucose transporter.	2	-1.0808	0.108146	-1.02377	0.119343	-0.528279	0.0716014	0.529912	0.377161	0.258508	0.685747	-1.31524	4.69275e-06	-0.987217	0.000245165	-0.332525	0.308728	-1.31379	0.000243052	-0.0774733	0.851922	-0.579044	0.00816521	-0.959556	0.000196026
	AT5G22510	Encodes a chloroplast-targeted alkaline/neutral invertase that is implicated in the development of the photosynthetic apparatus and nitrogen assimilation in seedlings to control the sucrose to hexose ratio.	2	-0.996825	0.109953	-0.852893	0.165052	-0.0219623	0.927024	0.114584	0.858003	0.013254	0.985564	-2.72784	1.51752e-06	-1.95423	0.000151909	-0.528487	0.0238375	-0.968417	6.51784e-05	-0.37903	0.0870017	-1.55355	0.000459099	-0.460632	0.288585
	AT4G17090	Encodes a beta-amylase targeted to the chloroplast. Transgenic BMY8 RNAi lines fail to accumulate maltose during cold shock suggesting that maltose accumulation coincides with BMY8 expression. Apart from maltose, the sugar content of the RNAi lines were similar to wildtype (glucose and sucrose unaffected).BAM3 activity declines 2 and 4 days after start of cold stress despite an increase in transc…	2	-1.65381	0.42424	-1.03919	0.635534	-1.50317	0.000554801	-1.66188	0.19128	-1.86806	0.149211	-0.775686	0.00867997	-0.937404	0.0034125	-2.28902	2.74487e-05	-0.68054	0.0948403	-0.671388	0.141037	1.02343	0.000684878	-0.169249	0.586375
	AT1G69830	Encodes a plastid-localized &#945;-amylase. Expression is reduced in the SEX4 mutant. Loss of function mutations show normal diurnal pattern of starch accumulation/degradation. Expression follows circadian rhythms.	2	-0.582766	0.247965	-0.0650728	0.911573	-1.24303	1.39687e-06	-0.78369	0.031601	-1.02811	0.0067604	-0.103169	0.722773	0.0998433	0.753591	-1.79201	1.08275e-07	-0.28102	0.104965	-0.419404	0.031765	0.0995656	0.703166	-0.117113	0.687165
	AT1G55740	seed imbibition 1;(source:Araport11)	2	-0.61615	0.423932	-0.0416537	0.960416	-0.18803	0.911699	-0.91186	0.176549	-2.17389	0.0147331	-0.336906	0.196727	-0.254939	0.37229	-2.98071	0.213961	0.00484872	0.997262	-1.39075	0.509583	0.130122	0.613526	0.0879464	0.767056
	AT5G20280	Encodes a protein with putative sucrose-phosphate synthase activity. When the gene was expressed in transgenic tobacco plants, a clear trend for increased SPS activity was noted.	2	-2.96065	0.000142357	-2.68189	0.000360233	-0.0601415	0.854459	-0.442905	0.4491	-0.36623	0.562284	-0.873968	0.00388156	-0.68522	0.0268381	-1.20045	0.000574263	-0.804121	0.00743409	-0.370625	0.254499	-1.51396	1.39894e-05	-0.235369	0.456058
	AT1G10760	Encodes an &#945;-glucan, water dikinase required for starch degradation. Involved in cold-induced freezing tolerance. Mutations that eliminate the GWD protein or affect the dikinase domain of the enzyme dramatically reduce both the amount of phosphate in the amylopectin and the rate of starch degradation. Mature leaves of these mutants accumulate amounts of starch up to seven times greater than …	2	-2.9337	0.0528821	-2.28151	0.138856	-1.67804	1.9238e-05	-1.55987	0.12224	-1.2995	0.224031	0.23675	0.361907	0.247296	0.377844	-1.82273	2.81703e-05	0.0316222	0.932404	-0.221466	0.556409	-1.02789	0.000246312	-0.49491	0.0640125
	AT5G26570	chloroplastidic phosphoglucan, water dikinase (PWD) which is required for normal degradation of leaf starch in Arabidopsis. NMR analysis of the mutants, suggests that the gene is specifically involved in the phosphorylation of the glucosyl residues of starch at the C3 position.	2	-2.90352	0.00051991	-2.05009	0.0097122	-1.59218	4.50357e-06	-1.29924	0.00289541	-1.79085	0.000161345	-0.592992	0.0334252	-0.167648	0.598007	-2.57643	1.08275e-07	-0.802278	0.00290193	-0.399751	0.154438	-0.743729	0.00690792	-0.158902	0.599677
	AT2G35840	Sucrose-6F-phosphate phosphohydrolase family protein;(source:Araport11)	2	-0.511131	0.207073	-0.103308	0.822157	-1.27656	4.77785e-06	-1.01616	0.0276755	-0.879513	0.0652692	-0.61735	0.0976444	-0.187286	0.659271	-0.577334	0.0096454	-0.759931	0.000867521	-0.872169	0.000786342	-2.64316	2.67901e-07	-1.84947	3.12264e-05
	AT4G18240	Encodes a starch synthase. In Arabidopsis leaves, the catalytic C-terminal region of STARCH SYNTHASE 4 promotes starch granule initiation while its non-catalytic N-terminal region determines starch granules morphology.	2	-1.46176	0.0365485	-1.22308	0.0765163	-1.51736	8.39283e-07	-0.466902	0.340874	-0.56844	0.259827	-1.07203	0.00106787	-0.329674	0.31474	-1.50268	3.57048e-06	-0.551891	0.0100801	-0.226115	0.337935	-1.77002	2.8701e-06	-0.970854	0.00325345
	AT5G19220	Encodes the large subunit of ADP-glucose pyrophosphorylase which catalyzes the first, rate limiting step in starch biosynthesis. The large subunit plays a regulatory role whereas the small subunit (ApS) is the catalytic isoform. Four isoforms (ApL1-4) have been identified. ApL1 is the major large subunit isoform present in leaves. Mutational analysis of APS1 suggests that APL1 and APL2 can compen…	2	-0.618765	0.529694	-0.755177	0.415194	-1.13431	0.00049402	-1.39868	0.197156	-0.896147	0.4532	-0.94885	1.51559e-05	-0.960251	3.25747e-05	0.419829	0.199303	0.286146	0.320893	-0.433176	0.16999	-0.840295	4.04747e-05	-0.680175	0.000743392
	AT5G48300	Encodes the small subunit of ADP-glucose pyrophosphorylase. The small subunit is the catalytic isoform responsible for ADP-glucose pyrophosphorylase activity. The presence of the small subunit is required for large subunit stability. Two isoforms of the small subunit (ApS1 and ApS2) have been described. ApS1 is the major small subunit isoform present in all plant tissues tested. The mRNA is cell-…	2	-0.453393	0.441221	-0.0417093	0.951464	-0.549036	0.0769089	-1.33233	0.0189657	-1.12253	0.0546969	-1.03298	0.00210673	-1.25251	0.000698884	-0.0357499	0.932935	-0.345325	0.243894	-0.337143	0.32218	-0.913044	0.00475136	-0.556158	0.0942198
	AT1G68020	Encodes an enzyme putatively involved in trehalose biosynthesis. The protein has a trehalose synthase (TPS)-like domain and a trehalose phosphatase (TPP)-like domain. It can complement a yeast mutant lacking both of these activities suggesting that this is a bifunctional enzyme.	2	-0.662524	0.395676	-0.639361	0.395108	-1.08515	0.000901395	0.122284	0.80643	-0.481715	0.279473	-0.175023	0.520199	-0.126718	0.679717	-0.174672	0.584559	-1.43976	1.05148e-05	-1.01666	0.000881321	0.00243671	0.992854	-0.54978	0.0419216
	AT4G30310	FGGY family of carbohydrate kinase;(source:Araport11)	2	-1.2284	2.59521e-05	-0.917922	0.000428234	-0.584438	0.00730581	-0.532685	0.0183133	-0.422669	0.067522	-0.941579	1.55664e-05	-0.830434	0.000133815	-0.837841	0.00116938	-0.993179	9.5706e-05	-0.369913	0.115054	-0.1911	0.251903	-0.0625546	0.752225
	AT1G62660	Glycosyl hydrolases family 32 protein;(source:Araport11)	2	-0.760131	0.0189864	-0.257981	0.433649	-1.41495	0.0314932	-0.775175	0.0936304	-0.72596	0.132358	-1.03128	0.000584153	-1.13402	0.000415504	-0.777846	0.22614	-1.71364	0.0108375	-1.05555	0.131158	-0.139426	0.5576	0.17783	0.494083
	AT4G09510	CINV2 appears to function as a neutral invertase based on the phenotype of a cinv1(AT1G35580)/cinv2 double mutant. It is predicted to be a cytosolic enzyme. CINV1, CINV2, and possibly other cytosolic invertases may play an important role in supplying carbon from sucrose to non-photosynthetic tissues.	2	-2.6685	1.54919e-06	-1.35423	0.00139673	-0.872685	0.0380029	-1.72172	7.45513e-05	-1.84437	4.55211e-05	0.829685	0.00311818	0.743758	0.0104494	-0.574667	0.179463	1.34037	0.0155978	-0.531811	0.521091	1.06926	0.000199357	0.215533	0.440048
	AT3G52180	Encodes a plant-specific glucan phosphatase that contains a noncatalytic carbohydrate-binding module as well as a dual specificity protein phosphatase domain. SEX4 can dephosphorylate C6- and C3-glucosyl residues on native starch grains and related maltodextrin compounds in vitro. This protein interacts with the plant SnRK AKIN11, binds starch, and is localized in the chloroplast. sex4 mutants ha…	2	-2.54305	0.00302636	-1.63168	0.0520178	-0.548982	0.252369	-3.28162	0.000248372	-2.34418	0.00730756	-0.121969	0.471673	-0.196542	0.267154	-0.260836	0.650137	1.42892	0.00935897	1.02287	0.0860079	-0.547872	0.00135678	-0.221265	0.192016
	AT1G66430	Encodes one of the several Arabidopsis fructokinases. Nomenclature according to Riggs 2017 has been adopted for the family by the community (personal communication, Boernke, Callis, Granot, Boernke, and Smeekens). Important for seed oil accumulation and vascular development.	2	-1.78733	4.57899e-05	-0.913314	0.0149752	-2.22971	0.000181141	-3.0415	5.3966e-08	-3.18392	4.74985e-08	-0.850404	0.000241051	-0.822438	0.000613621	-1.84205	0.00108187	0.6523	0.255317	0.959117	0.138708	-0.21581	0.269941	-0.139017	0.529928
	AT1G69200	Encodes a fructokinase-like protein (AT3G54090/FLN1, AT1G69200/FLN2), a member of the pfkB-carbohydrate kinase family. FLN1 and FLN2 are potential plastidial thioredoxin z (TRX z) targets. Mutants display mutant chloroplast development, general plant growth and development defects and defects in PEP-dependent transcription. The mRNA is cell-to-cell mobile.	2	-1.40662	0.00827583	-0.892754	0.0770608	-0.79868	0.229304	-1.4468	0.0238963	-1.12861	0.0895371	1.04643	0.00129071	0.793155	0.0149561	0.495206	0.434347	0.539041	0.461522	-0.18957	0.863229	-1.37993	5.53299e-05	-0.667617	0.033255
	AT3G01180	starch synthase 2;(source:Araport11)	2	-2.46016	7.75632e-05	-2.45159	6.90971e-05	-0.510987	0.0436523	-2.01666	0.00477781	-1.66884	0.0220474	0.514631	0.143447	0.685496	0.0618243	0.231662	0.393584	-0.695773	0.00759958	-0.23444	0.412569	-2.28802	1.62424e-07	-1.0285	0.00154113
	AT1G11720	Encodes a starch synthase that in addition to its role in starch biosynthesis also has a negative regulatory function in the biosynthesis of transient starch. The protein apparently contains a starch-binding domain (SBD).	2	-2.97441	0.000716484	-2.20786	0.00680116	-1.70887	4.03799e-05	-2.40775	0.00843206	-1.63185	0.086527	0.246755	0.208884	0.00867661	0.97326	0.1248	0.740714	-1.83671	1.76302e-05	-1.30334	0.00113941	-0.471474	0.0142066	-0.0898246	0.682425
	AT2G04270	Similar to E.coli endoribonuclease E. Functions as a ribonuclease, is located in the chloroplast, and is involved in chloroplast development. Loss of function mutants are white and arrest at the cotyledon stage. The phenotype is rescued by providing sucrose.	2	-2.52712	0.000145127	-2.32674	0.000303724	-1.78719	4.22836e-06	-2.72752	3.06152e-05	-2.46741	0.000127002	-0.299018	0.240331	0.018657	0.95507	-0.194975	0.472658	-1.26461	3.29571e-05	-0.632295	0.0193999	-1.18012	3.0657e-05	-0.738461	0.00486785
	AT4G00490	Encodes a chloroplast beta-amylase. The enzyme activity is very weak compared to BAM1 and BAM3. It forms a tetramer whose activity requires K+ and exhibits sigmoidal kinetics Mutants of BAM2 have no visible phenotype.	2	-1.23004	0.00957103	-1.24524	0.00757498	-0.403469	0.197376	-2.94629	1.22521e-05	-2.19594	0.000490566	-0.0869948	0.758965	-0.345263	0.215087	0.68388	0.0379317	0.425499	0.213775	-0.48389	0.262155	-0.84454	0.00155381	-0.627248	0.017693
	AT2G19860	Encodes a protein with hexokinase activity (AtHXK2) and acts as a sensor for plant sugar responses.	2	-1.16008	0.0159882	-1.2841	0.00687871	-1.36007	3.76971e-05	-2.75941	2.83816e-05	-3.02416	1.30953e-05	0.116359	0.473044	0.114269	0.517422	0.254956	0.314188	-0.627596	0.0182423	-0.686267	0.0253956	-0.253114	0.0915494	-0.0680406	0.70003
	AT5G04360	Encodes an enzyme thought to be involved in the hydrolysis of the &#945;-1,6 linkages during starch degradation in seed endosperm. However, a knockout mutant of Arabidopsis lacking limit dextrinase has normal rates of starch degradation in the leaf at night, indicating that more than one isoamylases might be involved in this process.	2	-1.27991	0.00998966	-0.656445	0.183812	-1.30025	4.27946e-06	-1.70827	4.14117e-05	-1.33968	0.000786486	-0.593293	0.104584	-0.524172	0.175429	-1.26413	2.01577e-05	-1.38369	2.03814e-06	-0.957173	0.000261742	-0.619149	0.0628898	-0.591685	0.0984001
	AT5G03650	Encodes starch branching enzyme (E.C.2.4.1.18) similar to SBE2 from maize and rice. Expressed throughout the plant and highest in seedlings and cauline leaves.	2	-1.50446	0.00129811	-0.983058	0.0255264	-0.789948	0.00435618	-1.7033	0.000359008	-1.43662	0.0024495	-1.12252	0.0011333	-0.71097	0.0351876	-0.378603	0.187549	-0.981761	0.0010323	-0.447821	0.136917	-1.24479	0.00030438	-0.625041	0.058604
	AT3G23640	heteroglycan glucosidase 1;(source:Araport11)	2	-2.22587	2.25806e-07	-1.46681	2.68929e-05	-0.674704	0.0677575	-2.01429	2.40286e-07	-1.62591	5.54046e-06	-1.06529	1.18317e-05	-0.368566	0.0698753	-0.0692502	0.884105	-1.23883	0.00157061	-0.657247	0.0986539	-0.637087	0.00132501	-0.218835	0.271268
	AT2G40840	Encodes a cytosolic protein with transglucosidase and amylomaltase activity. It is an essential component of the pathway from starch to sucrose and cellular metabolism in leaves at night. The protein binds to heteroglycans and utilizes glucose, mannose and xylose as acceptors. Fucose and galactose can also act as acceptors but less efficiently than the previous three. It was also was also recentl…	2	-2.25298	0.00268017	-1.50628	0.0383182	-1.11185	0.00670945	-2.97896	0.000426655	-2.3896	0.00435708	-0.0643951	0.828734	-0.384947	0.18175	-0.611111	0.160556	-0.328405	0.396986	0.167467	0.72786	-0.914144	0.00122569	-0.409308	0.145316
	AT1G78580	Encodes an enzyme putatively involved in trehalose biosynthesis. The protein has a trehalose synthase (TPS)-like domain but no trehalose phosphatase (TPP)-like domain. ATTPS1 is able to complement yeast tps1 mutants in vivo. The gene product modulates cell growth but not cell differentiation by determining cell wall deposition and cell division.	2	-1.24004	0.0289429	-1.01504	0.0695354	-0.871619	0.0263151	-2.31421	0.00176081	-1.93621	0.00940116	-0.574427	0.0410045	-0.171929	0.590145	-0.464904	0.263515	-0.25677	0.551755	0.0136776	0.981244	-1.07376	0.00034855	-0.312214	0.283078
	AT5G46110	Encodes a chloroplast triose phosphate / 3-phosphoglycerate translocator that transports triose phosphates derived from the Calvin cycle in the stroma to the cytosol for use in sucrose synthesis and other biosynthetic processes. A tpt mutant has altered acclimation responses. The mRNA is cell-to-cell mobile.	2	-1.87018	0.264556	-1.51826	0.371812	-1.47894	3.4115e-05	-1.90465	0.251029	-1.55743	0.365903	-0.385778	0.0437701	-0.651283	0.00247744	0.0753284	0.843839	-0.678656	0.0233255	0.0960084	0.802739	-0.698813	0.000643715	-0.597069	0.0043753
	AT5G24300	SSI is a plastidial enzyme and crucial for the synthesis of normal amylopectin in the leaves of Arabidopsis. The absence of SSI results in a deficiency in the number of shorter glucans which in turn affect the formation and connection of the amylopectin clusters in starch.	2	-1.91652	0.000689801	-1.16504	0.0269903	-1.60064	6.65711e-06	-2.60105	3.61672e-05	-2.5366	6.60363e-05	-0.890909	0.000450098	-0.630683	0.0105021	-1.10533	0.000621391	-0.938361	0.00163796	-0.534039	0.0790515	-1.14541	1.63573e-05	-0.615471	0.0101934
	AT1G43670	Encodes a fructose-1,6-bisphosphatase. This enzyme, in addition to catalyzing the formation of fructose-6-phosphate for sucrose biosynthesis, appears to play a role in fructose-mediated signaling that is independent of its enzymatic activity. atcfbp-1/fins1 mutants have reduced photosynthetic rates, elevated levels of starch and reduced levels of sucrose during the day. Although the protein is ex…	2	-1.60764	0.00219886	-0.766817	0.128009	-1.72504	3.87257e-06	-2.26413	0.000153137	-1.96263	0.000889234	-1.22874	9.45141e-06	-1.00602	0.000186244	-1.31757	0.000187554	-0.616752	0.0224439	-0.228158	0.460811	-0.880721	0.000298813	-0.575419	0.0155397
	AT5G17520	Encodes a maltose transporter that is expressed in leaves and roots. Mutations at the MEX1 locus cause accumulation of both starch and maltose in leaves, with maltose levels at least 40 times higher than that of wild-type. This gene encodes a protein located in the chloroplast envelope.	2	-1.77319	2.19548e-06	-0.985927	0.00073412	-1.81187	0.0057256	-2.52328	2.93364e-08	-2.5263	3.72132e-08	-1.15826	0.0023611	-0.837887	0.0234215	-0.938858	0.105716	-0.433568	0.500693	-0.17798	0.82941	-0.846572	0.00742105	-0.727196	0.0278657
Minor carbohydrate metabolism	AT2G37770	Encodes an NADPH-dependent aldo-keto reductase that can act on a wide variety of substrates in vitro including saturated and unsaturated aldehydes, steroids, and sugars. GFP-tagged AKR4C9 localizes to the chloroplast where it may play a role in detoxifying reactive carbonyl compounds that threaten to impair the photosynthetic process. Transcript levels for this gene are up-regulated in response t…	3	6.75569	1.51378e-05	6.9915	9.62656e-06	4.75733	0.0993249	6.18402	2.79373e-05	5.12127	3.51303e-05	1.17902	0.000139859	0.70341	0.0152072	4.01632	0.217053	-1.32744	0.694623	0.33628	0.933169	5.47357	1.26066e-13	4.04095	1.12361e-11
	AT4G03550	Encodes a callose synthase that is required for wound and papillary callose formation in response to fungal pathogens Erysiphe and Blumeria. Mutants are resistant to P. parasitica and exhibit an exaggerated PR1 response.Contributes to PAMP-induced basal defense. The mRNA is cell-to-cell mobile.	2	1.3934	0.00459044	1.13979	0.00997203	1.04167	0.000356286	2.09972	0.000345101	1.71209	0.00164272	1.29067	5.11391e-06	0.949661	0.000309845	0.35258	0.204526	-0.793425	0.00428229	-0.738644	0.0148941	2.37748	3.16385e-10	2.02658	8.02905e-09
	AT5G58730	pfkB-like carbohydrate kinase family protein;(source:Araport11)	2	1.92304	1.69968e-06	1.70935	1.57031e-06	0.80565	0.173674	1.65295	2.01783e-06	1.20598	3.38071e-05	0.372728	0.461535	0.250201	0.662452	0.338436	0.649911	-0.784437	0.167802	-0.365975	0.586797	1.23413	0.00111595	0.731643	0.0582431
	AT4G18010	Encodes an inositol polyphosphate 5-phosphatase that appears to have Type I activity. It can dephosphorylate IP3(inositol(1,4,5)P3) and IP4 (inositol(1,3,4,5)P4), but it does not appear to be active against phosphatidylinositol 4,5 bisphosphate. Overexpression of this gene renders plants insensitive to ABA in germination and growth assays.	2	2.50818	1.9179e-06	2.10862	3.90164e-06	2.49153	2.35639e-06	3.68678	1.01547e-08	3.36888	2.33653e-08	1.66637	5.5127e-07	1.18379	6.8692e-05	1.60326	0.000570002	-0.321524	0.314972	-0.310924	0.401599	0.0107327	0.964522	1.92084	5.09599e-08
	AT3G47800	Galactose mutarotase-like superfamily protein;(source:Araport11)	2	0.406829	0.399988	0.0164173	0.974841	0.477566	0.102202	3.81248	6.28919e-09	3.46457	1.39329e-08	0.337093	0.179686	0.675742	0.0138353	-0.525798	0.10543	0.565637	0.0671539	0.380772	0.272494	2.22029	8.18565e-09	1.81137	3.35552e-07
	AT3G56310	Member of Glycoside Hydrolase Family 27 (GH27)that functions as an &#945;-galactosidase.	2	0.496737	0.293977	0.446522	0.323802	1.0613	2.0492e-05	1.87624	0.00118483	1.75098	0.00237808	-0.988637	0.000280448	-0.521006	0.0424907	0.697121	0.00249387	-0.459513	0.0179296	-0.13869	0.536096	0.473832	0.042119	0.638944	0.0128932
	AT5G08380	alpha-galactosidase 1;(source:Araport11)	2	-0.613735	0.087015	-0.873264	0.013789	1.50816	0.000101849	2.38699	0.000105727	2.10856	0.000298434	-0.920769	0.00277306	-0.580496	0.0536656	-0.714489	0.0768369	-0.584375	0.119764	-0.0196566	0.971251	0.0938611	0.743763	0.251667	0.396769
	AT5G57655	xylose isomerase family protein;(source:Araport11)	2	-0.10821	0.951223	-0.25356	0.876872	-0.187348	0.498406	3.01734	0.00408364	2.57028	0.00952721	-2.67597	1.68265e-06	-1.07363	0.0169768	0.037813	0.914941	-1.70412	1.15574e-05	-1.25284	0.00067872	1.28304	0.00208653	0.81919	0.0514962
	AT5G37850	Encodes a pyridoxal kinase required for root hair development. Mutants are hypersensitive to Na+, K+ and Li+.	1	1.07722	0.0474464	0.909568	0.0706273	0.514945	0.0226133	0.510127	0.353649	0.508353	0.378913	0.883154	0.000121252	0.60495	0.0057516	0.702531	0.0058198	0.389503	0.0610264	-0.0437569	0.879144	1.11394	4.42661e-06	0.34928	0.0850838
	AT5G61760	Encodes an inositol polyphosphate 3-/6-/5-kinase that is localized to the nucleus. Able to complement a mutation in a yeast transcriptional regulator gene (ARG82/IPK2). Acts redundantly with ATIPK2alpha during pollen development, pollen tube guidance and embryogenesis.	1	0.558817	0.0409485	0.787636	0.00492248	0.763087	0.170622	0.387472	0.10696	0.164488	0.508775	1.05022	0.000206295	0.621409	0.0199917	-0.0205293	0.979777	-0.224325	0.7205	-0.100278	0.900958	0.737626	0.00335849	-0.0781453	0.785139
	AT1G34120	Encodes an inositol polyphosphate 5-phosphatase that appears to have Type I activity. It can dephosphorylate IP3(inositol(1,4,5)P3) and IP4 (inositol(1,3,4,5)P4), but it does not act on I(1)P, I(1,4)P2, or phosphatidylinositol(4,5)P2.	1	-0.179431	0.566287	-0.386879	0.166845	0.388103	0.253044	1.22569	0.000453746	1.00526	0.00229606	-0.117031	0.645826	-0.0195783	0.950316	0.0162723	0.971803	0.321249	0.322618	0.541835	0.139295	1.25216	1.2378e-05	1.18507	4.82026e-05
	AT3G07160	Encodes GSL10, a member of the Glucan Synthase-Like (GSL) family believed to be involved in the synthesis of the cell wall component callose. GSL10 is required for male gametophyte development and plant growth. Has a role in entry of microspores into mitosis. GSL10 mutation leads to perturbation of microspore division symmetry, irregular callose deposition and failure of generative cell engulfmen…	1	0.244434	0.649771	0.436442	0.389459	0.0634407	0.711536	1.2451	0.0147727	1.09244	0.032089	0.441034	0.0137236	0.528297	0.00636615	0.00627409	0.97534	-0.681585	0.000280881	-0.217902	0.233269	1.07664	1.47612e-06	0.80287	0.000108864
	AT5G11980	COG8 is a component of a putative conserved oligomeric Golgi (COG) complex that is thought to be involved in tethering of retrograde intra Golgi vesicles. It is required for proper deposition of cell wall materials in pollen tube growth. In mutant pollen,golgi appear abnormal.When homozygotes can be produced (by complementing the defect in pollen), the plants are embryo lethal suggesting an essen…	1	0.911617	0.000869786	0.807049	0.0014019	0.00997157	0.974706	0.679074	0.00535623	0.422318	0.0667969	-0.139948	0.362994	0.165867	0.314027	0.120727	0.709374	1.77986	1.38971e-05	1.21953	0.00197337	1.01876	3.8102e-07	0.522527	0.00162365
	AT1G55120	Encodes a protein with fructan exohydrolase (FEH) activity acting on levan-type fructans (6-FEH, levanase). The enzyme does not have invertase activity.	1	0.455192	0.0154203	1.04108	2.52684e-05	0.787348	0.0276658	0.797165	0.000105026	0.492486	0.00540223	-1.10182	0.000447392	-0.446366	0.137907	0.537159	0.171197	1.27492	0.00223451	0.494127	0.288067	0.419639	0.112185	0.834106	0.00542257
	AT3G06580	Encodes a protein with galactose kinase activity. The gene was shown to complement the yeast Agal1 mutant defective in the galactokinase gene GAL1.	1	-0.374682	0.261325	-0.349384	0.279154	0.027327	0.919218	1.03919	0.00149837	0.724039	0.0166257	-1.88254	0.0148427	-0.192563	0.752758	-0.190848	0.477512	-0.43762	0.041861	0.00190128	0.994944	-1.98884	0.000432576	-0.994796	0.0196441
	AT4G04970	encodes a gene similar to callose synthase The mRNA is cell-to-cell mobile.	1	-0.281927	0.226224	-0.857005	0.000379972	-0.36006	0.0276968	-0.117672	0.571856	-0.478039	0.0196475	-1.31213	3.5608e-06	-0.618625	0.0089818	-0.022164	0.917349	-1.28958	3.17744e-07	-0.482155	0.00932799	-0.566841	0.0079132	-0.441588	0.047781
	AT5G57330	Galactose mutarotase-like superfamily protein;(source:Araport11)	1	-0.958088	0.00111184	-1.01144	0.00052875	-0.0630473	0.768102	-0.196326	0.465719	-0.241877	0.385543	-1.64516	6.70522e-07	-1.30849	2.58167e-05	-0.534308	0.0156496	-0.320605	0.0880355	-0.0352327	0.890837	-0.619719	0.00804797	-0.359609	0.13935
	AT1G06490	Encodes Callose Synthase 7 (CalS7), a phloem-specific callose synthase responsible for callose deposition in developing sieve elements during phloem formation and in mature phloem induced by wounding.	1	-0.16225	0.734536	0.508692	0.235053	-1.41596	0.0133834	-0.01104	0.981631	-0.123303	0.796686	0.465856	0.242257	0.569182	0.176056	-0.894993	0.0953096	-0.339974	0.4679	0.0313117	0.962297	-1.71349	0.000206114	-1.26537	0.00366158
	AT5G42810	Encodes an inositol tetra-/pentaphosphate 2-kinase, involved in the biosynthesis of phytic acid, a regulator of intracellular signaling, a highly abundant animal antinutrient, and a phosphate and mineral storage compound in plant seeds. Is also required for growth and modulates phosphate homeostasis at the transcriptional level.	1	-1.25715	0.0944003	-1.3637	0.0652012	-0.485212	0.257751	-0.467681	0.625714	-0.517962	0.606871	0.484322	0.0297539	0.282228	0.234045	0.241457	0.598475	0.399177	0.275087	0.48275	0.255404	-2.25789	9.49248e-10	-1.04519	8.27294e-05
	AT1G71710	DNAse I-like superfamily protein;(source:Araport11)	1	-1.63609	0.0162659	-1.32481	0.0477974	-1.56061	3.01733e-06	-0.573348	0.18863	-0.828164	0.0612514	-0.0612074	0.800301	0.0703217	0.794812	-0.582449	0.016061	0.0993482	0.65094	-0.959286	0.000563787	-0.953469	0.00010454	-0.437485	0.0554777
	AT5G19150	AT5G19150 is a dehydratase that converts (S)-NAD(P)HX to NAD(P)H.	1	-1.2373	0.000303487	-1.14018	0.000545765	-0.572304	0.101968	-0.307922	0.228432	0.0468334	0.880632	-0.134227	0.564951	-0.379231	0.108667	-0.242315	0.529734	0.0310431	0.920449	0.499631	0.096675	-0.617627	0.00542367	-0.403869	0.075376
	AT1G19600	pfkB-like carbohydrate kinase family protein;(source:Araport11)	1	-0.337375	0.394575	-0.105407	0.805078	-1.17837	0.00147481	-0.534252	0.102479	-0.576993	0.0879299	0.154776	0.375881	0.0431428	0.841078	-0.296137	0.370842	-0.538717	0.0332286	-0.39465	0.167739	-0.0751719	0.658381	-0.306328	0.0811728
	AT4G23730	Galactose mutarotase-like superfamily protein;(source:Araport11)	1	-0.278282	0.494114	-0.465068	0.207895	-0.489203	0.0277615	-0.781504	0.0502865	-0.971825	0.0182915	-0.0644066	0.766181	-0.25369	0.23211	-0.288979	0.223876	0.555944	0.010571	0.221389	0.36593	-1.12965	3.59819e-06	-0.650832	0.00235927
	AT1G06730	pfkB-like carbohydrate kinase family protein;(source:Araport11)	1	-0.400737	0.167015	-0.366901	0.196088	-0.559184	0.13462	-0.67211	0.0267034	-0.618108	0.0474731	-0.241889	0.221632	0.0797381	0.734296	-0.585767	0.151457	-0.212268	0.594408	-0.638459	0.174683	-1.48396	8.86665e-08	-0.456282	0.0257007
	AT5G53850	Encodes a trifunctional dehydratase / enolase / phosphatase involved in the methionine salvage.	1	-0.594011	0.219171	-0.490114	0.302734	-0.728048	0.00173317	-0.0941232	0.846023	-0.164111	0.740756	-0.316219	0.0834386	-0.256418	0.189085	-0.715241	0.00414251	-0.263388	0.195855	0.426477	0.064858	-1.23618	4.0692e-07	-0.692717	0.000778785
	AT5G14500	aldose 1-epimerase family protein;(source:Araport11)	1	-0.782904	0.025417	-0.800122	0.0213807	-0.734441	0.127636	-0.477177	0.144545	-0.811935	0.0166257	-0.247726	0.520165	-0.105055	0.813906	-0.948299	0.0817266	-0.666104	0.14916	-0.0525072	0.933294	-1.22608	0.00192081	-1.05817	0.007557
	AT3G61610	Galactose mutarotase-like superfamily protein;(source:Araport11)	1	-0.821295	0.514589	0.248661	0.8379	-1.21284	0.195595	-0.9168	0.214276	-2.31998	0.0233839	0.700851	0.0691082	0.169265	0.715698	-0.861237	0.361097	0.593234	0.693874	-2.90448	0.294854	0.716885	0.519799	2.40051	0.0194857
	AT3G26380	APSE is a member of the Glycoside Hydrolase (GH27) family that functions as a &#946;-l-arabinopyranosidase.	1	-1.54955	0.00809756	-1.27048	0.0252641	-0.600289	0.0306949	0.569866	0.317543	0.450936	0.453402	-1.02731	0.000337426	-0.995939	0.000812593	-0.192502	0.534327	-2.1044	5.39602e-07	-1.09511	0.000734209	0.0401404	0.881349	0.119188	0.676994
	AT5G51970	Encodes a putative sorbitol dehydrogenase that can be thiolated in vitro.	1	-1.74384	3.80775e-05	-2.05984	3.80512e-06	-1.21593	0.000377901	-1.11711	0.000211489	-1.07059	0.000453961	-1.8078	1.13171e-06	-1.00742	0.00122635	-0.666513	0.0376959	-2.52408	1.20562e-07	-1.89027	8.26774e-06	0.409651	0.107565	-0.0817025	0.790072
	AT1G14520	Encodes MIOX1. Belongs to myo-inositol oxygenase gene family.	1	-2.09728	0.000804145	-2.33641	0.000702551	0.836984	0.537872	-1.65375	0.081136	-2.54005	0.030015	-0.518452	0.175828	0.0425987	0.932314	-1.54624	0.464522	-1.51136	0.0477583	-0.0101647	0.990959	0.0891844	0.826136	0.0208358	0.965119
	AT2G21250	NAD(P)-linked oxidoreductase superfamily protein;(source:Araport11)	1	-2.17543	0.000270788	-1.61536	0.00393031	-0.752939	0.00170471	-1.27554	0.0104131	-1.35097	0.00843845	-0.00545395	0.978424	0.0210069	0.923417	-0.622912	0.0126907	-0.204327	0.366948	0.204124	0.434197	0.547512	0.00148719	0.493947	0.00584942
	AT5G08370	Member of Glycoside Hydrolase Family 27 (GH27)that functions as an &#945;-galactosidase.	1	-2.96459	1.82605e-05	-3.24478	1.77589e-05	-1.11922	0.0441966	-1.84805	0.0022567	-2.10638	0.000872909	-0.518273	0.170832	0.00743892	0.987901	-0.118734	0.853202	0.179185	0.773826	-0.181617	0.818986	1.70505	6.63502e-05	1.14722	0.00482164
	AT3G02870	Encodes a L-galactose-1-phosphate phosphatase, involved in ascorbate biosynthesis.	1	-2.27277	0.0147602	-2.10229	0.0226115	-1.45938	0.00208859	-2.46459	0.0986766	-2.00814	0.206651	-0.600513	0.019058	-0.737076	0.0078266	1.22389	0.00431549	0.376845	0.427013	0.166676	0.789273	-0.599859	0.0150338	0.462916	0.0756878
	AT2G21370	Although this gene has a sequence similar to xylulose kinases, several lines of experimental evidence suggest that it does not act on xylulose or deoxy-xylulose.	1	-2.20845	0.00140015	-1.6768	0.0113767	-1.6834	1.37127e-05	-3.48363	1.44967e-05	-2.6487	0.000448175	-0.936794	0.00095175	-1.00549	0.000846742	-0.283927	0.3216	1.66264	1.53091e-05	1.23371	0.000911221	-1.21379	3.54594e-05	-0.666783	0.012169
	AT5G10170	myo-inositol-1-phosphate synthase isoform 3.Expressed in leaf, root and silique. Immunolocaliazation experiments with an antibody recognizing MIPS1, MIPS2, and MIPS3 showed endosperm localization.	1	-0.427915	0.437004	0.115091	0.853613	-0.39423	0.390016	-1.73124	0.000355471	-1.61137	0.000921525	-0.405837	0.0205122	-0.249726	0.176039	-1.05551	0.0486941	-0.0240692	0.962922	0.284075	0.589437	-0.598317	0.00103704	-0.535922	0.00454892
	AT3G14570	encodes a protein similar to callose synthase	1	0.196686	0.759714	0.47165	0.429804	-0.998819	0.0314176	-1.20658	0.0148251	-1.87752	0.0008202	-0.611665	0.0324441	-0.102021	0.760347	-1.6795	0.00506783	-0.307312	0.406113	0.0791835	0.86995	-0.466902	0.091913	0.55243	0.0560698
	AT4G27600	Encodes a phosphofructokinase B-type carbohydrate kinase family protein, NARA5. Regulates photosynthetic gene expression.	1	0.025696	0.967209	-0.00606496	0.991515	-1.10408	1.88023e-05	-1.01531	0.0693601	-1.13365	0.0477456	-1.23016	3.95387e-05	-0.421242	0.104076	-1.58985	1.89517e-06	-0.0723456	0.739689	-0.348371	0.125312	-0.479625	0.0405084	-0.426107	0.0895078
	AT5G53580	NAD(P)-linked oxidoreductase superfamily protein;(source:Araport11)	1	-2.22186	1.50118e-05	-1.79822	0.00012894	-1.81093	6.54237e-06	-2.87325	2.4562e-06	-1.87832	0.000482739	-0.684708	0.00646323	-0.82346	0.00254794	-0.945324	0.00194701	-0.253287	0.398934	0.219123	0.525776	-0.63959	0.00760962	-0.64794	0.0112623
	AT4G39120	Encodes a chloroplast-localized member of the myo-inositol monophosphatase family, IMPL2 (myo-Inositol monophosphatase like 2) that seems to have multiple enzymatic activities. It contributes to histidine biosynthesis based on it histidinol-phosphate phosphatase activity. In addition, the protein can act as an inositol monophosphatase and an L-galactose-1-phosphate phosphatase in vitro.	1	-1.93871	5.17496e-05	-1.42727	0.000868357	-1.13064	0.00119664	-2.15304	1.30649e-05	-1.68507	0.000211991	-0.0615421	0.934607	-0.319941	0.678443	-1.00724	0.00481828	-0.224611	0.449201	0.0771157	0.84069	-0.241046	0.651056	-0.795836	0.159182
	AT5G13000	encodes a gene similar to callose synthase	1	-1.99776	0.000411654	-1.76101	0.00120554	-1.90045	4.16942e-07	-1.8398	0.000672839	-1.59454	0.00328056	-0.498806	0.0162807	-0.378724	0.0791903	-0.147496	0.57291	0.0581579	0.815908	0.180222	0.494091	-0.716866	0.000801615	-0.670085	0.00259204
	AT5G52190	Sugar isomerase (SIS) family protein;(source:Araport11)	1	-1.5299	0.000550851	-1.41513	0.00099848	-1.38654	0.00105254	-2.70402	1.92014e-06	-2.55327	4.70668e-06	-0.998307	0.0684251	0.143985	0.810285	-1.86227	0.000548733	-0.207364	0.626977	0.0499113	0.930463	-0.366361	0.449824	-0.699233	0.184412
	AT1G04420	NAD(P)-linked oxidoreductase superfamily protein;(source:Araport11)	1	-1.45712	0.003976	-0.931426	0.05695	-2.00277	0.000102469	-2.38149	2.25686e-05	-2.52785	1.49817e-05	0.0774169	0.79274	-0.268689	0.362943	-1.51237	0.00200967	-1.10876	0.0114981	-1.08514	0.0270886	-0.328223	0.176874	-0.304851	0.250549
	AT2G27680	NAD(P)-linked oxidoreductase superfamily protein;(source:Araport11)	1	-1.18914	0.168514	-0.547144	0.556801	-1.15061	3.61338e-05	-1.43221	0.0632854	-1.29072	0.106976	-0.552541	0.00635527	-0.576798	0.00721507	-0.738121	0.00441779	0.00897487	0.973386	0.0404537	0.894237	-0.703145	0.000743344	-0.263993	0.197543
	AT1G31190	Encodes a myo-inositol monophosphatase IMPL1 (myo-Inositol monophosphatase like 1).	1	-1.45776	2.29811e-05	-1.00482	0.000909744	-1.03646	4.64111e-05	-1.57856	3.89444e-05	-1.48941	0.000106071	-0.245588	0.159204	-0.315288	0.090222	-0.716727	0.00245523	-0.916822	0.000549938	-0.320707	0.211516	-0.948488	8.2728e-06	-0.585026	0.00249663
	AT5G66530	Galactose mutarotase-like superfamily protein;(source:Araport11)	1	-1.15518	0.00505103	-0.32916	0.434326	-1.5421	3.62098e-05	-2.49729	6.42845e-07	-2.01028	1.42866e-05	0.158822	0.415626	-0.0813367	0.719604	-1.03429	0.00253089	-0.627903	0.0442379	-0.146005	0.703885	-0.865659	6.68392e-05	-0.148832	0.470693
	AT4G28706	pfkB-like carbohydrate kinase family protein;(source:Araport11)	1	-0.89774	0.0232354	-0.18179	0.679134	-0.794553	0.0174529	-2.06717	6.78211e-06	-2.25728	3.18978e-06	-0.477847	0.0628147	-0.610934	0.0263663	-1.29359	0.00180462	-0.697865	0.0464575	0.198259	0.624752	-1.1375	8.5376e-05	-0.823321	0.00298684
	AT1G06690	NAD(P)-linked oxidoreductase superfamily protein;(source:Araport11)	1	-1.12551	0.00012858	-0.458811	0.071487	-0.92431	0.00134066	-2.45813	1.97462e-07	-2.18658	1.26912e-06	-0.337808	0.160008	-0.46732	0.0688517	-0.880229	0.00372236	-0.865848	0.00690479	-0.293419	0.388123	-0.823732	0.00109565	-0.573941	0.0236456
Amino acid metabolism	AT5G37600	encodes a cytosolic glutamine synthetase, the enzyme has high affinity with substrate ammonium	3	4.7809	0.000436806	4.32534	0.00104809	3.75409	7.23013e-07	4.89253	8.90731e-05	5.21944	5.66829e-05	-0.411051	0.0210751	-0.216845	0.252467	1.94951	0.000812203	2.45303	7.15934e-05	1.4802	0.00870025	2.12542	7.93579e-11	2.32713	7.21266e-11
	AT1G08630	Encodes a threonine aldolase, involved in threonine degradation to glycine. Primarily expressed in seeds and seedlings.	3	4.24598	0.000212047	4.84006	9.80612e-05	4.49995	0.0900112	5.59933	9.78938e-05	4.30612	0.000891441	-1.32389	0.00021691	-0.837015	0.0124335	2.46857	0.458383	-0.00332469	0.995642	-0.636538	0.393992	0.338613	0.25166	-0.787146	0.0187634
	AT5G17330	Encodes one of two isoforms of glutamate decarboxylase. The mRNA is cell-to-cell mobile.	3	4.68128	7.83554e-05	3.93871	0.000232203	3.71364	0.000369953	6.20089	0.000303365	5.0894	0.000329455	1.40666	3.29524e-07	0.770098	0.000542956	0.211095	0.891001	1.20748	0.412688	1.99446	0.204401	-0.804526	0.00011081	-0.55459	0.00589533
	AT1G10070	Encodes a chloroplast branched-chain amino acid aminotransferase. Complements the yeast leu/iso-leu/val auxotrophy mutant. Involved in cell wall development.	7	3.02273	0.0665464	2.64654	0.0677586	5.88663	0.0958098	5.86891	3.34271e-05	4.19531	5.67088e-05	3.64798	6.13634e-09	3.19632	8.64556e-08	3.80482	0.352002	-0.42472	0.492877	-0.932708	0.173527	5.44587	1.87708e-12	4.10608	2.73986e-10
	AT5G38710	Methylenetetrahydrofolate reductase family protein;(source:Araport11)	7	3.12702	7.16369e-06	3.05017	3.27548e-06	4.59584	0.00382978	2.46403	4.65715e-05	2.47	7.26292e-05	0.745562	0.0961192	0.870337	0.0691118	2.51688	0.140415	-0.344815	0.636693	-0.465695	0.605122	2.86244	8.71203e-07	2.43739	1.39097e-05
	AT2G13810	ALD1 is a L-lysine alpha-aminotransferase. It is part of the pipecolic acid biosynthetic pathway, where it catalyzes the biochemical conversion of lysine to epsilon-amino-alpha-ketocaproic acid (KAC) which is subject to subsequent transamination, cyclization and isomerization to form 2,3-dehydropipecolic acid.	8	2.26623	0.0265936	-1.25464	0.411039	8.43806	0.000143476	11.6275	2.77232e-07	11.0403	4.29088e-07	-1.0855	0.169548	-0.979021	0.211697	2.30932	0.316555	-2.38785	0.362864	0.98577	0.665968	2.26997	4.03712e-05	2.35725	5.25997e-05
	AT1G48850	Flavoenzyme-encoding gene essential for embryo development.	4	2.82427	9.32812e-07	2.74134	6.12464e-07	1.20314	0.000276778	2.45358	4.11284e-06	1.87372	4.64937e-05	2.30476	3.12712e-08	1.52717	1.01187e-05	0.393876	0.217758	0.573586	0.0508609	0.477802	0.151585	1.41894	4.24303e-06	0.688585	0.00936209
	AT1G22410	Class-II DAHP synthetase family protein;(source:Araport11)	4	2.73873	5.16007e-06	2.77227	4.25827e-06	1.76037	2.01418e-05	2.1036	8.08849e-05	1.83688	0.000357772	1.17005	2.10163e-05	0.963621	0.000341414	0.292812	0.403192	0.871638	0.00921609	0.902751	0.0140861	0.505051	0.0196418	0.359363	0.116951
	AT4G35630	Encodes a phosphoserine aminotransferase which is involved in serine biosynthesis in the chloroplast which operates via the phosphorylated pathway. The mRNA is cell-to-cell mobile.	4	1.78039	0.000256126	2.32836	2.72844e-05	1.66254	0.00101496	3.19614	3.89331e-07	2.65766	1.56455e-06	1.67074	7.09331e-06	1.15486	0.000699495	-0.113889	0.863227	1.29645	0.0245968	1.17382	0.0711636	1.61769	4.99246e-06	0.501698	0.0895611
	AT3G25900	Homocysteine S-methyltransferase family protein;(source:Araport11)	4	2.90811	3.45704e-05	2.69604	2.75808e-05	-0.0587435	0.96406	3.66558	6.00587e-06	1.86437	0.00170037	1.78653	0.00338729	1.55774	0.0132149	-1.15613	0.434189	-0.093977	0.932193	-0.87245	0.51854	1.66368	0.000985582	1.49652	0.0042269
	AT3G06350	Encodes a bi-functional dehydroquinate-shikimate dehydrogenase enzyme that catalyzes two steps in the chorismate biosynthesis pathway.	4	2.28661	9.213e-07	2.40898	3.32225e-07	0.443096	0.0664225	2.47276	4.13549e-07	1.8071	6.37042e-06	2.4908	8.53704e-05	1.64904	0.00566177	0.0085155	0.978966	-0.612344	0.013694	-0.454406	0.096973	1.35309	0.0105391	0.28255	0.631529
	AT5G07440	Encodes the beta-subunit of the glutamate dehydrogenase. The enzyme is almost exclusively found in the mitochondria of stem and leaf companion cells.	4	4.47452	0.00285138	5.40559	0.00139677	1.41248	4.54993e-05	3.93292	0.000517478	2.45393	0.00287134	1.14646	0.211057	0.774986	0.46095	-1.1375	0.00927479	-0.504899	0.0521012	-0.395065	0.186553	0.565461	0.505538	1.01737	0.214025
	AT2G45300	encodes 3-phosphoshikimate 1-carboxyvinyltransferase / 5-enolpyruvylshikimate-3-phosphate / EPSP synthase involved in chorismate biosynthesis The mRNA is cell-to-cell mobile.	4	3.52071	1.2408e-07	4.03828	2.98934e-08	0.760389	0.0708145	2.60925	8.93817e-06	1.9929	8.44943e-05	0.933938	0.000303289	0.817466	0.00175382	-0.152879	0.784557	-0.160324	0.805781	0.0754634	0.92739	2.06248	5.0343e-09	1.38564	2.99306e-06
	AT5G05730	ASA1 encodes the alpha subunit of anthranilate synthase, which catalyzes the rate-limiting step of tryptophan synthesis. ASA1 is induced by ethylene, and forms a link between ethylene signalling and auxin synthesis in roots.	4	2.07042	7.19639e-06	2.2084	2.48837e-06	1.75789	1.04333e-05	3.90773	2.08057e-08	3.46298	5.82875e-08	-1.28299	0.0157799	-0.267249	0.591163	0.881544	0.0100398	0.167451	0.582645	-0.105305	0.779466	-0.924002	0.0144178	-0.897202	0.0248875
	AT5G17990	Encodes the tryptophan biosynthetic enzyme phosphoribosylanthranilate transferase (PAT1, called trpD in bacteria). Converts anthranilate and phosphoribosylpyrophosphate into phosphoribosylanthranilate and inorganic pyrophosphate. The mRNA is cell-to-cell mobile.	4	1.4225	1.87792e-05	1.02047	0.0001537	1.81828	1.25031e-05	3.21675	8.48149e-08	2.63987	4.18168e-07	0.085862	0.741503	-0.235873	0.368181	0.536267	0.115262	-0.155558	0.65651	-0.54289	0.16177	-0.697571	0.00318977	-0.218257	0.369923
	AT3G53180	Encodes a protein that is the product of a fusion gene with a C-terminal GSI like sequence and an N-terminal part sharing homology with nodulins. It self-assembles into oligomers and its expression is increased in response to flagellin treatment. The protein co-localizes with microtubules and binds gamma-tubulin. RNAi lines are affected in root morphogenesis.	4	2.6552	0.00130877	2.91533	0.00060364	0.367318	0.334924	2.75546	9.6563e-05	2.52516	0.00023479	-0.78115	0.00145352	-0.434575	0.0726201	0.350614	0.410364	0.435717	0.239751	0.201315	0.656551	-0.193808	0.383262	0.0487189	0.857952
	AT1G72330	Encodes for alanine aminotransferase ALAAT2.	4	1.64372	0.00029984	1.63398	0.000175482	1.63249	8.97873e-05	3.86556	1.63011e-09	3.13713	4.69493e-09	-0.624394	0.00208379	-0.609862	0.00403317	-0.768252	0.117873	0.384482	0.22022	0.181608	0.655411	1.02001	9.83917e-06	1.30561	8.08379e-07
	AT1G25220	Catalyzes the first step of tryptophan biosynthesis: Chorismate L-Glutamine = Anthranilate Pyruvate L-Glutamate. Functions as a heterocomplex with anthranilate synthase alpha subunit (ASA1 or ASA2).	4	2.91412	1.13269e-07	3.00971	4.07104e-08	3.22693	2.51714e-06	3.27469	1.30004e-07	3.07971	2.96358e-07	-0.0495524	0.869352	-0.112637	0.723308	1.49817	0.00896366	1.08005	0.0199556	1.16237	0.0262886	-0.0281552	0.919179	0.257461	0.346618
	AT1G17745	encodes a 3-Phosphoglycerate dehydrogenase The mRNA is cell-to-cell mobile.	4	2.713	2.87319e-08	2.71864	9.87935e-09	3.64803	1.00446e-06	3.02935	1.59558e-07	2.61186	5.36268e-07	0.0606074	0.848893	0.356353	0.247491	0.639634	0.233707	-2.73939	0.00250174	-1.31683	0.0756943	1.36997	4.8889e-05	0.685866	0.0274325
	AT1G12420	ACT domain repeat 8;(source:Araport11)	4	0.673178	0.0357695	0.93188	0.00514801	2.32129	2.40002e-05	3.79377	9.29074e-08	3.66712	1.83676e-07	-0.209961	0.625629	-0.97313	0.0333668	0.383918	0.489376	-1.42008	0.00802285	-1.90326	0.00514753	2.24402	2.59038e-05	1.68919	0.00113955
	AT4G27070	Tryptophan synthase beta. Expressed at low levels in all tissues. The mRNA is cell-to-cell mobile.	4	1.10374	0.000302663	1.41486	2.4435e-05	1.47462	0.00506536	1.3398	0.00223088	1.3054	0.00347402	-1.31393	0.0329221	-1.02448	0.0848792	0.453958	0.46648	-1.35735	0.0795302	-0.910102	0.287693	0.904632	0.36475	1.4629	0.124943
	AT5G54080	Encodes a homogentisate 1,2-dioxygenase that can convert homogentisate to malylacetoacetate and is likely to be involved in tyrosine catabolism.	4	0.510779	0.651962	0.361473	0.742256	1.09608	0.00212969	1.64848	0.0189222	0.903811	0.146675	-1.17774	0.000533283	-0.514366	0.11589	0.597393	0.108617	-1.18109	7.7779e-05	-0.134696	0.658872	1.84621	1.46381e-06	0.853205	0.00756747
	AT3G45300	Encodes isovaleryl-coenzyme a dehydrogenase. Mutants have increases in 12 seed free amino acids, accumulation of seed homomethionine and 3-isovaleroyloxypropyl-glucosinolate, with a concomitant decrease in seed 3-benzoyloxypropyl-glucosinolate. The mRNA is cell-to-cell mobile.	4	1.42125	0.0069327	1.46631	0.00425398	0.651495	0.143468	2.07105	9.62087e-06	1.03637	0.00176192	-1.23374	0.00062558	-0.85041	0.0164078	0.754119	0.119865	-2.07407	5.7549e-06	-1.4157	0.000740859	3.27864	1.24344e-09	2.57841	9.56935e-08
	AT4G39980	Encodes a 2-deoxy-D-arabino-heptulosonate 7-phosphate (DAHP) synthase, which catalyzes the first committed step in aromatic amino acid biosynthesis. Gene expression is induced by wounding and pathogenic bacteria Pseudomonas syringae. The mRNA is cell-to-cell mobile.	5	1.21031	0.0405376	1.48551	0.0131121	0.678302	0.0250216	2.02145	0.00584387	1.57336	0.022892	2.39654	1.58317e-07	1.38614	0.000176701	-0.349501	0.288336	0.0912952	0.787098	0.113408	0.773699	2.64314	7.22014e-09	1.60684	1.43422e-05
	AT5G11520	Encodes the chloroplastic isozyme of aspartate aminotransferase. Involved in aspartate biosynthesis and nitrogen metabolism. mRNA is expressed in senescing leaves.	5	2.04495	0.0200074	2.12947	0.0132863	0.343574	0.0573533	2.49006	0.00260073	1.91658	0.0116273	1.27792	6.27553e-06	0.852282	0.000867902	-0.551416	0.00956724	-0.0219436	0.915066	0.1981	0.334289	2.65142	4.59651e-11	1.45977	7.02789e-07
	AT2G16790	P-loop containing nucleoside triphosphate hydrolases superfamily protein;(source:Araport11)	5	-0.150391	0.790254	0.558741	0.254767	0.544923	0.686649	2.64079	0.000118067	1.80368	0.00373749	0.485852	0.198458	0.107853	0.817473	-0.793684	0.65594	-0.0822822	0.947985	0.219502	0.880027	2.31171	2.01951e-05	1.22423	0.0153145
	AT5G34930	Encodes biotin carboxylase subunit (CAC2).	5	1.77642	2.5998e-06	1.65344	1.90042e-06	0.385562	0.196358	1.56014	1.30701e-05	1.33344	6.45501e-05	0.0472115	0.91514	0.800124	0.0470179	-0.567899	0.12743	-0.759652	0.00357472	-0.556375	0.0462555	2.99134	4.19959e-06	1.34736	0.0208434
	AT2G20610	Confers auxin overproduction. Mutants have an over-proliferation of lateral roots. Encodes a C-S lyase involved in converting S-alkylthiohydroximate to thiohydroximate in glucosinolate biosynthesis. Induced in epidermal cells attacked by powdery mildew.	5	0.881601	0.00466355	0.771576	0.00759029	0.311374	0.216634	0.60803	0.133053	0.35892	0.385846	0.341267	0.397879	0.332474	0.447964	-0.42614	0.120175	-0.755876	0.00617464	0.215173	0.476394	2.74581	3.70867e-07	2.34531	6.06909e-06
	AT2G33150	Encodes an organellar (peroxisome, glyoxysome) 3-ketoacyl-CoA thiolase, involved in fatty acid b-oxidation during germination and subsequent seedling growth. Mutants have defects in glyoxysomal fatty acid beta-oxidation. EC2.3.1.16 thiolase.	5	0.892786	0.596468	0.638396	0.712115	0.583833	0.0809214	1.48718	0.260723	1.00763	0.448915	1.58741	0.000788397	0.655413	0.152762	0.316597	0.400774	-2.46819	1.43158e-06	-1.0717	0.0106699	2.8835	4.8298e-07	1.88387	0.000182659
	AT5G18170	Encodes the 43 kDa alpha-subunit of the glutamate dehydrogenase with a putative mitochondrial transit polypeptide and NAD(H)- and alpha-ketoglutarate-binding domains. Mitochondrial localization confirmed by subcellular fractionation. Combines in several ratios with GDH2 protein (GDH-beta) to form seven isoenzymes. Catalyzes the cleavage of glycine residues. May be involved in ammonia assimilation…	5	0.571024	0.200104	0.407239	0.337247	0.329788	0.323604	1.96504	9.75982e-06	1.76715	3.28241e-05	1.65293	1.31171e-05	0.812263	0.0133573	1.2488	0.00141654	-0.0441882	0.899169	-0.628671	0.0666248	4.40569	3.5287e-12	3.50269	2.72968e-10
	AT1G08250	Encodes a plastid-localized arogenate dehydratase involved in phenylalanine biosynthesis. Although this enzyme has sequence similarity to prephenate dehydratases, it is 98 times more active with arogenate than prephenate in enzymatic assays.	5	0.988651	0.00302093	1.05955	0.00111934	-0.431859	0.151952	0.0839497	0.858003	-0.218397	0.631262	1.64445	1.37888e-05	1.05644	0.00207652	-0.530979	0.112248	0.410279	0.209978	0.40002	0.304615	3.85009	3.19446e-11	3.26372	9.68051e-10
	AT2G36880	methionine adenosyltransferase 3;(source:Araport11)	5	2.54322	0.00118997	3.16121	0.000174108	0.347019	0.291197	0.53658	0.511774	0.482569	0.572975	2.0693	1.22907e-05	1.5495	0.000516431	-0.103311	0.802408	1.20617	0.00155374	0.580088	0.139371	4.16686	2.1805e-10	2.82334	1.56653e-07
	AT4G34200	Encodes a 3-phosphoglycerate dehydrogenase that is essential for embryo and pollen development.	5	2.27917	3.44226e-06	3.12094	2.43648e-07	0.808838	0.0171616	1.65169	0.000691526	1.07722	0.0116925	2.17089	5.28062e-07	1.4624	0.0001098	-0.229069	0.581376	-0.00325043	0.994985	0.3024	0.561143	3.39933	1.84e-10	2.19677	2.60547e-07
	AT1G64660	Encodes a functional methionine gamma-lyase, a cytosolic enzyme catalyzes the degradation of methionine into methanethiol, alpha-ketobutyrate and ammonia. The catabolism of excess methionine is important to methionine homeostasis. The mRNA is cell-to-cell mobile.	5	2.14346	0.000117997	2.51861	2.35818e-05	-0.169631	0.777889	1.03939	0.00452974	0.449646	0.158242	-0.437396	0.329573	-0.879971	0.0616274	-1.36941	0.0569869	-0.499737	0.0882833	-0.91599	0.0114147	4.31604	5.19255e-09	2.37009	3.9085e-05
	AT4G13940	Encodes a S-adenosyl-L-homocysteine hydrolase required for DNA methylation-dependent gene silencing. The mRNA is cell-to-cell mobile.	5	0.898905	0.265948	1.04649	0.192138	0.367987	0.21608	0.200957	0.810193	0.287751	0.736909	1.92829	5.22692e-07	1.29876	0.000111007	0.423651	0.196279	-0.568812	0.0540619	-0.0665048	0.86679	1.37282	1.43107e-05	0.796121	0.00547237
	AT3G06850	dihydrolipoamide branched chain acyltransferase	5	0.451758	0.423054	0.690577	0.200544	0.0351468	0.929086	0.258567	0.430475	-0.0162069	0.966022	1.38505	1.37582e-06	0.469914	0.0354546	-0.0761436	0.865594	-0.0126216	0.963064	-0.0761384	0.80347	1.38642	4.72043e-07	0.865786	0.000293712
	AT2G45440	Encodes a protein that likely has dihydropicolinate synthase activity based on its mutant phenotype of decreased lysine levels and increased aspartate levels. The mutant also has increased levels of threonine. The enzyme is predicted to localize to the chloroplast.	5	0.712939	0.00111922	1.13125	1.6155e-05	0.342574	0.248638	-0.0386008	0.856748	-0.312874	0.111512	1.78535	1.09138e-05	1.36455	0.000398388	-0.643544	0.0751495	0.24951	0.453376	-0.47406	0.254154	1.25099	0.000286469	0.697847	0.034832
	AT4G01850	S-adenosylmethionine synthetase 2;(source:Araport11)	5	0.26101	0.796097	0.73559	0.436887	0.171045	0.491653	-0.297675	0.747513	-0.345225	0.719624	0.879767	0.00149303	0.788084	0.005705	0.469643	0.0759939	0.388853	0.132345	0.580307	0.0469967	0.781794	0.00259034	0.200079	0.461577
	AT2G26800	Mutant has increased seed ile, leu and val as well as his and arg.	5	0.248375	0.253937	0.149488	0.476131	0.105579	0.685936	-0.474287	0.0535428	-0.555297	0.0291557	1.17902	0.000187369	0.0937667	0.779124	0.338753	0.187258	-0.800677	0.000840458	-0.458012	0.057549	0.52734	0.0456889	0.668604	0.0204247
	AT5G17920	Encodes a cytosolic cobalamin-independent methionine synthase, involved in methionine regeneration via the activated methyl cycle (SAM cycle). The protein undergoes thiolation following treatment with the oxidant tert-butylhydroperoxide. The mRNA is cell-to-cell mobile.	5	0.0623468	0.97982	0.298932	0.898936	-0.650117	0.00151188	-0.658329	0.756822	-0.803764	0.713702	1.42388	2.20762e-05	1.30397	0.000127693	-0.63692	0.00384084	-0.180522	0.31929	0.343747	0.0919789	1.92325	1.65699e-07	1.10703	0.000310454
	AT3G29200	L-ascorbate peroxidase	5	0.278944	0.200751	0.76822	0.00174742	-0.779362	0.0756654	-0.392287	0.176082	-0.5153	0.0825887	1.59339	2.90989e-06	1.21071	0.000141292	-1.05602	0.0357162	-0.876946	0.036142	-0.204895	0.67508	0.944634	0.000505552	0.179285	0.513516
	AT2G21940	Encodes a shikimate kinase. Its transcripts appear to be expressed most highly in mature embryos and senescing leaves, and its transcript levels rise during heat stress and recovery. It is believed to be localized to the chloroplast.	5	-0.512704	0.0662441	-0.0909699	0.770008	0.130688	0.760841	-0.937536	0.000756999	-0.819388	0.00330305	1.9048	2.10092e-06	1.36513	0.000191459	0.149475	0.752944	1.84419	9.12656e-06	0.942575	0.0116113	1.071	0.000727281	0.00466115	0.990474
	AT2G17265	Encodes a homoserine kinase (HSK) which produces O-phospho-L-homoserine (HserP), a compound at the branching point of methionine and threonine biosynthesis. HSK is found in the stromal fraction of chloroplasts. Mutation of this gene results in higher level of the amino acid homoserine and resistance to downy mildew pathogen Hyaloperonospora arabidopsidis.	5	-0.437971	0.0978444	-0.278033	0.284116	-0.399734	0.16806	-1.40377	2.1038e-05	-1.34971	4.72657e-05	1.94389	5.70958e-06	1.5936	0.000118333	-0.281649	0.381864	0.320616	0.23714	0.688361	0.0263415	0.416432	0.181671	-0.410871	0.231018
	AT2G22250	Encodes a prokaryotic-type plastidic aspartate aminotransferase with glutamate/aspartate-prephenate aminotransferase (PAT) activity.	5	1.74603	3.2455e-06	1.85117	8.97884e-07	-0.10061	0.84132	0.421945	0.102056	-0.0171319	0.951916	1.83689	3.6006e-07	1.29835	4.85615e-05	-0.24851	0.637449	1.30763	0.0248342	1.16067	0.0786698	1.02379	0.000152005	0.342444	0.17488
	AT5G09300	Thiamin diphosphate-binding fold (THDP-binding) superfamily protein;(source:Araport11)	5	-1.86841	1.96124e-05	-1.63976	8.19882e-05	-0.68848	0.50884	0.354133	0.247365	0.460855	0.138612	0.0460072	0.807523	0.0745008	0.714675	-1.72051	0.185571	0.687441	0.357577	0.770188	0.379157	2.85331	6.35466e-13	2.28903	4.12352e-11
	AT3G13450	branched chain alpha-keto acid dehydrogenase E1 beta	5	0.59368	0.378721	0.909649	0.166084	-1.79944	0.00733668	1.55601	0.000250857	0.374937	0.208635	-0.221969	0.161007	-0.223938	0.188249	-0.768855	0.171197	-0.535997	0.0769165	-0.334358	0.340134	1.10356	2.53661e-07	0.679885	0.000213186
	AT1G03090	MCCA is the biotinylated subunit of the dimer MCCase, which is involved in leucine degradation. Both subunits are nuclear coded and the active enzyme is located in the mitochondrion.	5	0.61894	0.483021	0.914214	0.282427	-1.37989	0.017557	0.884409	0.0440652	0.126559	0.76685	-1.34178	9.36166e-06	-0.876164	0.00142322	-0.148435	0.806276	-1.92318	4.29792e-05	-1.33697	0.00295235	0.411316	0.0694951	0.171088	0.501788
	AT3G49680	Encodes a chloroplast branched-chain amino acid aminotransferase. Complements the yeast leu/iso-leu/val auxotrophy mutant.	5	0.373761	0.0951852	0.600112	0.00934131	-1.81714	7.56335e-06	-1.14107	0.000112976	-1.13697	0.000161372	-0.773646	0.00843703	-0.777949	0.0111375	-0.19432	0.546966	-0.0317703	0.929712	-0.386931	0.291733	-0.286687	0.259779	-0.259236	0.351692
	AT5G65890	Member of ACT domain containing protein family. ACT domains are amino acid binding domains. Shows strongest expression in flowers and siliques.	5	0.680647	0.00445369	0.741277	0.00166308	-2.7433	4.49911e-07	-1.74812	1.43363e-06	-1.63374	4.51252e-06	-0.0885463	0.833204	-0.229204	0.597854	-0.363583	0.117121	-1.90559	2.74388e-06	-1.89967	1.92937e-05	0.535345	0.175111	0.413525	0.342349
	AT3G47340	encodes a glutamine-dependent asparagine synthetase, the predicted ASN1 peptide contains a purF-type glutamine-binding domain, and is expressed predominantly in shoot tissues, where light has a negative effect on its mRNA accumulation. Expression is induced within 3 hours of dark treatment, in senescing leaves and treatment with exogenous photosynthesis inhibitor. Induction of gene expression was…	6	2.15989	0.274253	3.22457	0.152543	-5.76825	0.401779	-1.45422	0.252525	-1.74426	0.176646	-1.43329	0.03717	0.0122657	0.98879	0.372929	0.89095	-2.74519	0.00104277	-2.48657	0.00524535	6.58623	0.000200413	5.58938	0.00179538
	AT1G77760	Encodes the cytosolic minor isoform of nitrate reductase (NR). Involved in the first step of nitrate assimilation, it contributes about 15% of the nitrate reductase activity in shoots. Similar to molybdopterin oxidoreductases at the N-terminus, and to FAD/NAD-binding cytochrome reductases at the C-terminus. Cofactors: FAD, heme iron (cytochrome B-557), and molybdenum-pterin.	1	-3.51601	4.32089e-05	-2.90586	0.000319852	1.76905	0.0023563	0.445484	0.511567	0.645609	0.36711	-0.515936	0.371551	-0.902705	0.151192	1.81666	0.00407637	-1.23145	0.0147659	0.260293	0.664633	0.561523	0.10041	-0.957563	0.0161265
	AT1G37130	Identified as a mutant resistant to chlorate. Encodes nitrate reductase structural gene. Involved in nitrate assimilation. Has nitrate reductase activity. Up-regulated by the fungus P. indica. Binds transcription factor At2g35940. The mRNA is cell-to-cell mobile.	1	-0.695125	0.593799	-2.21541	0.0414986	1.66372	0.00110619	0.137841	0.91865	0.0550924	0.970231	-2.41939	4.27849e-06	-3.16919	6.07497e-07	1.74099	0.00180453	-0.927417	0.0457433	0.439393	0.424256	-0.611412	0.126598	-0.384909	0.38633
	AT5G14760	At5g14760 encodes for L-aspartate oxidase involved in the early steps of NAD biosynthesis. In contrary to the EC 1.4.3.16 (l-aspartate oxidase - deaminating) the enzyme catalyzes the reaction L-aspartate + O2 = iminoaspartate (alpha-iminosuccinate) + H2O2. Flavoenzyme-encoding gene.	1	1.90017	3.46669e-06	1.33676	0.000117054	3.04135	0.00182552	-0.60141	0.18476	-0.263696	0.613559	-0.0995963	0.634657	0.0606315	0.80118	2.5239	0.0143081	-1.52606	0.150811	-0.642521	0.571975	-0.371246	0.0462769	0.197502	0.331475
	AT1G67550	Encodes a nickel-containing urea hydrolase involved in nitrogen recycling. It requires three urease accessory proteins for its activation. The mRNA is cell-to-cell mobile.	1	0.226719	0.423932	0.13295	0.630783	0.991222	0.000103043	0.799422	0.00454369	1.09784	0.000794696	-0.475226	0.0293327	-0.3086	0.18043	1.13812	8.21467e-05	-0.820557	0.000726544	-0.909194	0.000881321	-0.173326	0.407741	-0.044919	0.860791
	AT1G80360	Encodes a methionine-specific aminotransferase that uses the ethylene biosynthetic intermediate methionine as an amino donor and the auxin biosynthetic intermediate indole-3-pyruvic acid as an amino acceptor to produce L-tryptophan and 2-oxo-4-methylthiobutyric acid. These actions allow VAS1 to coordinate both auxin and ethylene biosynthesis. It functions downstream of TAA1/SAV3 but upstream of Y…	1	0.954094	0.00194893	0.370926	0.1274	0.3506	0.169308	1.70244	2.32733e-06	1.26471	3.64276e-05	-0.202718	0.266925	0.098008	0.641429	0.200527	0.501491	-1.75703	1.45187e-06	-2.3334	4.80754e-07	0.517887	0.00454299	0.348133	0.0633273
	AT1G70570	anthranilate phosphoribosyltransferase;(source:Araport11)	1	0.110381	0.744106	-0.259293	0.364814	0.183924	0.351164	0.0656409	0.834002	-0.0512896	0.875348	-0.156513	0.369567	-0.03382	0.876716	0.563773	0.00986153	-2.95598	3.02494e-09	-2.04367	2.26292e-07	-0.381651	0.022184	-0.170136	0.344571
	AT5G38530	TSBtype2 encodes a type 2 tryptophan synthase beta subunit that catalyzes a condensation reaction between serine and indole to generate tryptophan.It appears to form a homodimer. Its biological role has not yet been determined, but it has a very high affinity for indole which may be involved in allowing TSBtype2 to carefully limit free indole build-up. But, to date no overall change in plant morp…	1	1.34254	0.000324995	1.98469	1.2372e-05	0.927903	0.0014469	1.61199	0.000164059	1.24762	0.00139136	-0.719377	0.0868598	-0.361329	0.408187	0.220977	0.485569	1.39022	0.000131142	0.569542	0.113025	0.381227	0.266362	0.62806	0.0841857
	AT2G31810	ACT domain-containing small subunit of acetolactate synthase protein;(source:Araport11)	1	1.2714	0.175213	1.53555	0.100084	0.77224	0.00365202	1.20981	0.0711871	1.16762	0.09039	-0.453018	0.00444641	-0.374372	0.022343	0.159118	0.593873	0.727749	0.00848966	0.221944	0.461744	-0.191815	0.186395	-0.166298	0.296062
	AT5G04740	Encodes a ACT domain-containing protein. The ACT domain, named after bacterial aspartate kinase, chorismate mutase and TyrA (prephenate dehydrogenase), is a regulatory domain that serves as an amino acid-binding site in feedback-regulated amino acid metabolic enzymes.	1	0.864754	0.00574405	0.510896	0.0603913	-0.113028	0.686526	1.65088	3.71569e-06	1.10655	0.000147633	-1.1585	0.000553844	-0.599275	0.058056	-0.305976	0.290412	0.543743	0.0247388	0.710674	0.010152	0.398128	0.155197	0.393302	0.197339
	AT1G49820	encodes 5-methylthioribose kinase, involved in methionine cycle The mRNA is cell-to-cell mobile.	1	0.168207	0.528719	-0.00812907	0.977081	0.844147	0.00248164	0.558494	0.0259587	0.818092	0.00406085	-0.542219	0.00402262	-0.52271	0.00812828	0.296338	0.3216	1.04191	0.000275983	0.616793	0.0299877	0.373468	0.0307683	0.070758	0.726213
	AT2G14170	Arabidopsis thaliana methylmalonate-semialdehyde dehydrogenase	1	0.406417	0.592925	0.545672	0.452188	-0.262807	0.218212	1.33049	0.00812148	1.0401	0.0316171	-0.218322	0.258145	0.130795	0.547862	-0.0124136	0.964274	0.372074	0.0912611	0.26173	0.293355	-0.0319792	0.873435	-0.158478	0.438172
	AT2G30970	ASPARTATE AMINOTRANSFERASE 1	1	0.401239	0.15388	1.02499	0.00150213	-0.231591	0.334634	0.790687	0.0120519	0.379344	0.202359	0.689933	0.00255277	0.227287	0.3326	-0.310532	0.234984	0.455819	0.0732394	0.241824	0.422865	-0.62734	0.00386874	0.01955	0.941844
	AT3G61440	Encodes a cysteine synthase isomer CysC1. The isomer is however less effective in cysteine biosynthesis. It is involved in beta-cyanoalanine biosynthesis, an intermediate of cyanide detoxification pathway. The mRNA is cell-to-cell mobile.	1	0.853187	0.294275	0.738396	0.349837	0.771551	0.00131202	0.335883	0.691468	0.559055	0.51311	0.125297	0.576681	-0.329284	0.147811	0.77903	0.00275435	0.932697	0.000353335	0.513586	0.0402053	-1.02478	4.30294e-05	-0.639736	0.00648428
	AT5G14800	Delta 1-pyrroline-5-carboxylate reductase, catalyzes the final step in proline biosynthesis from glutamate and ornithine.In situ hybridization indicated that under normal growth conditions, the highest concentration of P5CR transcripts occurs in the cortical parenchyma, phloem, vascular cambium and pith parenchyma in the vicinity of the protoxylem. Single gene in Arabidopsis.	1	0.162045	0.550688	0.626645	0.0200639	0.588944	0.133886	0.306286	0.278967	0.601339	0.0513731	-1.05898	0.00311124	-0.233111	0.501406	0.707022	0.098433	0.0630152	0.886709	0.0202633	0.97293	-0.631933	0.0247207	-0.499265	0.0921574
	AT2G03667	Asparagine synthase family protein;(source:Araport11)	1	-0.345157	0.129675	-0.13864	0.556213	-0.260847	0.659403	0.482607	0.0223541	0.450339	0.0376152	0.884634	0.00834914	0.597656	0.0827897	0.724945	0.167941	0.585831	0.187293	0.66531	0.199002	-1.03371	0.00192905	-0.485293	0.138967
	AT5G13780	Encodes the catalytic subunit of a N-terminal acetyltransferase.	1	0.187625	0.752981	0.141706	0.807483	0.324464	0.0948524	-0.288662	0.597302	-0.0859521	0.889949	0.853418	5.43352e-05	0.659404	0.00125189	0.334468	0.11611	0.221449	0.21073	0.0451121	0.85018	-0.638713	0.000685973	-0.526617	0.00597
	AT4G15940	Fumarylacetoacetate (FAA) hydrolase family;(source:Araport11)	1	0.532871	0.266156	0.293594	0.516232	0.249792	0.397417	0.454532	0.300473	0.392506	0.393889	-0.0476501	0.797931	-0.0888454	0.651166	0.0479061	0.903259	-0.0597343	0.814894	0.121968	0.671951	0.884259	1.14609e-05	0.842805	4.13718e-05
	AT4G31990	Encodes a plastid-localized aspartate aminotransferase. Does not display any PAT (glutamate/aspartate-prephenate aminotransferase) activity even in the presence of a high concentration of prephenate.	1	0.0341626	0.932839	0.00537914	0.988585	0.0837726	0.667397	0.668139	0.0751774	0.47496	0.209935	-0.119755	0.521507	-0.0830209	0.694909	-0.274712	0.16248	0.242599	0.181234	0.170496	0.418055	0.121599	0.491736	0.237659	0.204715
	AT5G43280	Encodes the peroxisomal delta 3,5-delta2,4-dienoyl-CoA isomerase, a enzyme involved in degradation of unsaturated fatty acids. Gene expression is induced upon seed germination.	1	0.492618	0.184783	0.366066	0.290588	-0.258361	0.352884	0.0818909	0.815916	-0.232309	0.485135	-0.16787	0.405785	-0.48399	0.0228167	-0.459627	0.133562	-0.323966	0.184416	0.299087	0.27699	1.20429	1.67673e-06	0.355699	0.0804625
	AT4G34840	Encodes one of the 5'-methylthioadenosine nucleosidases (AT4G38800/MTN1; AT4G34840/MTN2). Double mutant, mtn1-1mtn2-1, retains approximately 14% of the MTN enzyme activity present in the wild type and displays a pleiotropic phenotype that includes altered vasculature and impaired fertility.	1	0.697473	0.00829033	0.431704	0.0642143	0.938601	0.0694246	-0.0883777	0.71701	-0.367494	0.112899	-0.352955	0.192726	0.112674	0.724359	0.531146	0.375518	-0.0538454	0.906002	-0.260655	0.612373	0.700818	0.0102797	0.121753	0.697775
	AT5G65780	Encodes a chloroplast branched-chain amino acid aminotransferase, can complement the yeast leu/iso-leu/val auxotrophy mutant. Note that the AT5G65780.2 gene model (TAIR10) has been obsoleted due to the lack of experimental support. The mRNA is cell-to-cell mobile.	1	-0.354824	0.228463	-0.546746	0.0511354	-0.00819691	0.97714	-0.433376	0.132213	-0.312106	0.305563	0.0987516	0.605149	0.0332155	0.88539	0.946004	0.0012846	0.700947	0.00516702	0.426054	0.108172	0.913521	1.76153e-05	0.177993	0.345254
	AT3G49640	Aldolase-type TIM barrel family protein;(source:Araport11)	1	-0.0977869	0.77175	-0.0502834	0.880412	-0.270624	0.567512	-0.470027	0.0609802	-0.323968	0.22259	-0.269815	0.569931	0.0750794	0.89318	-0.0791651	0.891408	0.906961	0.0189812	0.148927	0.777923	0.387732	0.361572	0.495698	0.273282
	AT4G29840	threonine synthase	1	-0.172658	0.543074	-0.00125856	0.99666	-0.710665	0.00180117	-0.164326	0.531997	-0.123653	0.664206	0.391672	0.153464	0.0809857	0.811673	-2.15381	4.43574e-07	-0.651956	0.00603571	-0.586908	0.0247318	-0.529775	0.0398749	-0.158717	0.587495
	AT4G20930	Encodes a 3-hydroxyisobutyrate dehydrogenase.	1	-0.760207	0.139046	-0.0617569	0.919529	-1.10941	0.241136	0.786642	0.0747296	-0.246143	0.573952	-1.05919	0.00341461	-0.426183	0.234281	-0.153423	0.880144	-1.05253	0.0149736	0.407325	0.337171	-0.902765	0.00804956	-0.0736658	0.850854
	AT1G02020	nitroreductase family protein;(source:Araport11)	1	-0.449695	0.110866	-0.677554	0.0128666	-0.0570706	0.860149	-0.434161	0.106907	-0.253672	0.383803	-0.129308	0.608059	0.440533	0.0745087	0.355783	0.232188	-1.05746	0.000640941	0.202658	0.50113	-1.23881	8.5964e-06	-0.474852	0.0423147
	AT1G12050	Encodes a fumarylacetoacetase that converts fumarylacetoacetate to acetoacetate and fumarate and is likely to be involved in tyrosine catabolism.	1	-0.637408	0.183242	-0.50698	0.282068	0.0254785	0.938294	0.509231	0.300453	0.348616	0.498354	-0.771728	0.00207708	-0.443426	0.0735128	0.183621	0.577062	-1.47819	9.85025e-06	-0.490857	0.0759839	-0.741074	0.0020259	-0.0990744	0.706834
	AT3G55610	encodes delta 1-pyrroline-5-carboxylate synthetase B. Gene expression is induced by dehydration, high salt and ABA. Knock-out mutations in P5CS2 are embryo-lethal. P5CS2 appears to be present in different cells and/or different subcellular locations from P5CS1 in a tissue-dependent manner. Mutants are defective in pollen development.	1	-0.341341	0.344381	0.0773565	0.849521	-0.0945597	0.7151	0.0494888	0.890982	-0.0422501	0.910802	0.0769632	0.69778	0.0719233	0.743073	-0.360706	0.164686	-1.43142	8.09799e-06	-0.836272	0.00330516	-0.789958	0.000107134	-0.576707	0.00374572
	AT4G33510	Enzyme catalyzing the first committed step in aromatic amino acid biosynthesis The mRNA is cell-to-cell mobile.	1	0.381091	0.611045	0.532508	0.45597	0.230522	0.175877	0.4045	0.559099	0.399051	0.584487	-1.99173	1.91853e-06	-1.81235	1.18263e-05	-0.54798	0.00507132	-0.0823825	0.650841	-0.0551504	0.80357	-1.12179	0.000397959	-0.872738	0.00599521
	AT5G56760	Encodes a cytosolic serine O-acetyltransferase involved in sulfur assimilation and cysteine biosynthesis. Expressed in the vascular system.	1	0.556303	0.0576554	0.778469	0.00942717	-0.259234	0.243747	-0.50662	0.0538585	-0.79841	0.00412883	-2.28163	4.59667e-08	-1.96882	7.48019e-07	-0.457816	0.0633253	0.361377	0.100798	0.142286	0.605267	-0.62521	0.0124502	-0.699687	0.00972591
	AT2G34470	Encodes a urease accessory protein which is essential for the activation of plant urease.	1	-1.50895	0.000232909	-1.62022	8.86207e-05	0.410817	0.040575	-0.448015	0.18801	0.272156	0.498082	-1.83797	1.09709e-05	-0.850963	0.0157706	0.0902739	0.714575	-0.178005	0.381697	0.132143	0.585304	-1.10946	0.0011472	-0.490501	0.147451
	AT1G76990	ACT domain repeat 3;(source:Araport11)	1	-0.288752	0.801087	-0.88885	0.357441	-0.563422	0.129081	-0.194816	0.812497	-0.0498801	0.95704	-1.49457	1.13171e-06	-0.878645	0.000558655	1.14756	0.00529679	0.159761	0.674811	-0.480698	0.225414	-1.13336	9.43338e-06	-0.564611	0.0118883
	AT2G41040	S-adenosyl-L-methionine-dependent methyltransferases superfamily protein;(source:Araport11)	1	-0.383555	0.0773067	-0.422201	0.0435488	-0.0452446	0.913536	-1.07576	0.000445859	-0.925478	0.00242209	-0.95257	0.00338341	-0.550061	0.0843557	0.626338	0.0789224	0.316001	0.360348	-0.212128	0.651075	-1.44444	2.33557e-05	-0.359303	0.237658
	AT1G43710	Encodes a serine decarboxylase that is involved in ethanolamine metabolism and is crucial for plant growth.	1	-0.084285	0.754962	-0.46534	0.0422698	-0.222248	0.352224	-0.817769	0.00219167	-0.54548	0.0393136	-1.12111	3.6008e-06	-0.930676	7.10263e-05	-0.0943342	0.745376	-0.235632	0.31769	-0.633037	0.0213112	-0.327971	0.0617611	-0.581109	0.003573
	AT1G78140	S-adenosyl-L-methionine-dependent methyltransferases superfamily protein;(source:Araport11)	1	-0.640807	0.0107286	-0.266404	0.275794	-0.83286	0.0111546	-0.721842	0.0039619	-0.635547	0.0121768	-1.63213	3.3885e-08	-0.993923	2.82846e-05	-0.349758	0.294192	0.12358	0.70089	0.278041	0.431871	-0.778104	0.000111959	-0.475114	0.0131808
	AT5G52100	Is essential for chloroplast NAD(P)H dehydrogenase activity, which is involved in electron transfer between PSII and PSI. Likely functions in biogenesis or stabilization of the NAD(P)H dehydrogenase complex. The mRNA is cell-to-cell mobile.	2	-4.03824	0.0010979	-3.73126	0.0020625	-3.32083	2.71293e-05	-4.21451	0.00060642	-3.58122	0.0029454	-3.2856	9.98364e-07	-2.9438	3.05703e-06	-0.663157	0.096876	0.507217	0.146398	0.288524	0.494713	-1.6968	1.46646e-05	-0.840266	0.0159447
	AT3G59890	Dihydrodipicolinate reductase, bacterial/plant;(source:Araport11)	2	-1.10597	0.0275704	0.178441	0.721586	-1.88698	0.0276094	-2.16976	0.000204964	-3.11966	2.57642e-05	0.187774	0.261335	0.269855	0.12679	-0.0263296	0.972843	1.17444	0.202122	-0.458657	0.749018	-0.166255	0.296802	-0.148445	0.398201
	AT1G69523	S-adenosyl-L-methionine-dependent methyltransferases superfamily protein;(source:Araport11)	2	-0.584813	0.0260106	0.27462	0.323502	-2.32007	7.07234e-05	-2.9098	4.28772e-07	-3.51565	6.97245e-08	-0.259088	0.376224	-0.379958	0.21591	-1.37882	0.00223571	0.920359	0.0584934	0.183373	0.78909	-0.31122	0.249203	-0.502794	0.0853517
	AT3G02020	encodes a monofunctional aspartate kinase	2	-3.76425	6.89109e-05	-2.29623	0.00332198	-3.05916	0.00887566	-4.94576	0.00054508	-4.05097	0.00358983	0.176537	0.239439	0.119261	0.474974	-0.801567	0.434649	-1.53955	0.184613	-1.46532	0.281142	0.368428	0.0121839	0.0479755	0.77952
	AT5G65010	Encodes asparagine synthetase (ASN2).	2	-3.57657	0.000235602	-3.48314	0.000294424	-3.02691	7.70571e-05	-2.03129	0.0695554	-1.82814	0.116861	0.357253	0.104038	0.296135	0.210742	0.322889	0.568662	0.242978	0.676699	0.759244	0.218836	0.00808368	0.971848	-0.0347001	0.896094
	AT1G69040	ACT-domain containing protein involved in feedback regulation of amino acid metabolism	2	-2.93408	0.00183612	-3.35815	0.000464998	-2.55831	0.000117395	-1.23297	0.0132949	-1.09215	0.0331655	-1.91429	9.36299e-06	-1.18516	0.0018032	-0.501966	0.263862	1.02338	0.0128578	0.022938	0.970099	-1.75757	1.13887e-05	-0.583502	0.088162
	AT2G15620	Involved in the second step of nitrate assimilation. Its expression is induced by nitrate. The mRNA is cell-to-cell mobile.	2	-2.5247	3.58475e-05	-2.71204	1.25646e-05	-0.954065	0.00720504	-1.31522	0.0359918	-1.32823	0.0392993	-1.62882	3.31005e-06	-1.57681	1.26109e-05	-0.58923	0.115474	-0.510167	0.134054	-0.328403	0.409691	-0.839699	0.00261358	-0.701924	0.0151822
	AT3G63250	Encodes a homocysteine methyltransferase (HMT). Among the three HMT coding genes in the genome, HMT2 is responsible for a significant proportion of HMT activity in the flower stalks and silique hulls. However, HMT2 does not significantly contribute to the total HMT activity in seeds.	2	-1.70996	0.000952512	-1.56078	0.00191665	-0.702503	0.0629091	-1.86973	7.13169e-05	-1.35931	0.00171558	-0.452532	0.19912	-0.556149	0.137166	-0.553342	0.169424	-0.208472	0.493583	-0.602876	0.0940759	-1.86516	6.19935e-06	-1.31859	0.000579278
	AT5G16290	Encodes a regulatory subunit of acetohydroxy acid synthase (AHAS), the &#64257;rst committed enzyme in the branched chain amino acid biosynthesis pathway.	2	-1.96208	1.43203e-06	-1.69067	6.63588e-06	-1.54022	0.000443364	-1.90319	1.12574e-05	-1.3893	0.000569117	-1.60258	0.0855863	-0.0758741	0.926845	-0.355586	0.315346	0.308211	0.32068	0.187252	0.630079	-1.46281	0.0236724	-1.41901	0.0338655
	AT4G34030	MCC-B is involved in leucine degradation in mitochondria. The active protein is a dimer of MCC-A and MCC-B. MCC-A is biotinylated whereas MCC-B is not. The mRNA is cell-to-cell mobile.	2	-0.798714	0.16371	-1.15223	0.0328605	-1.18338	0.00743561	-0.398342	0.306792	-1.04752	0.00727082	-0.531665	0.398021	-0.470293	0.48217	0.0979785	0.84019	-2.12991	6.50508e-06	-1.27245	0.00213975	-0.468911	0.452239	-0.202847	0.770312
	AT2G24580	FAD-dependent oxidoreductase family protein;(source:Araport11)	2	-1.26875	1.15102e-06	-1.89121	2.80032e-08	-1.44554	0.00827494	-1.27569	6.24632e-06	-1.52942	9.90948e-07	-0.637717	0.00320609	-0.379284	0.0791539	0.244327	0.607018	-2.64668	0.000514419	-2.51551	0.00343555	-0.310372	0.107266	-0.158825	0.463784
	AT4G02610	Aldolase-type TIM barrel family protein;(source:Araport11)	2	-1.89578	0.000867781	-2.01288	0.000491179	-0.325483	0.4267	-1.23152	0.00555192	-1.16326	0.00986794	0.0910674	0.685049	0.0850989	0.730239	0.113657	0.810295	0.243378	0.487357	0.384745	0.331969	-0.388075	0.0436062	-0.09218	0.679834
	AT3G57050	Encodes cystathionine beta-lyase, the second enzyme in the methionine biosynthetic pathway. Mutants show defects in root development, reduced methylation and maintenance of the quiescent center.	2	-2.3002	7.44515e-06	-1.44832	0.000967974	-0.119298	0.764	-0.737516	0.158187	-0.815542	0.12747	-0.915188	1.98529e-05	-0.693558	0.000699695	-0.0711191	0.879078	0.204426	0.569817	0.131157	0.767001	0.258062	0.118271	-0.101041	0.594017
	AT5G08100	Encodes an asparaginase that catalyzes the degradation of L-asparagine to L-aspartic acid and ammonia.	2	-0.76932	0.0476191	-0.431608	0.262223	-0.089803	0.803623	-0.432855	0.136853	-0.474274	0.113051	-0.206767	0.537159	0.102989	0.790117	-0.972236	0.0175639	-0.842723	0.00658373	-0.338006	0.307071	0.53334	0.0776183	0.0760215	0.838998
	AT5G10330	Encodes histidinol-phosphate aminotransferase that catalyzes the eighth step in histidine biosynthesis. Loss of function mutations are embryo lethal.	2	-1.11375	0.000263639	-1.39765	5.21469e-05	-0.31801	0.619712	-1.21334	0.000124122	-0.93562	0.00166144	-0.377978	0.0165521	-0.255473	0.120953	-0.906465	0.226273	-0.847379	0.192487	-0.883133	0.271266	-0.0336063	0.834847	-0.0825269	0.630917
	AT2G19940	Putative N-acetyl-gamma-glutamyl-phosphate reductase;(source:Araport11)	2	-1.07902	0.00310266	-0.581915	0.0935667	-1.08465	0.00133568	-0.961151	0.0067825	-1.09099	0.00310963	0.819303	0.00885946	0.492453	0.127838	-0.827427	0.013956	0.239722	0.469246	0.0817039	0.854599	-0.274938	0.340816	0.000941925	0.997961
	AT5G21060	Glyceraldehyde-3-phosphate dehydrogenase-like family protein;(source:Araport11)	2	-1.20222	8.63904e-05	-1.27143	3.76617e-05	-0.38161	0.13612	-0.853254	0.00262081	-0.802087	0.00548563	-0.360049	0.22736	-0.151421	0.653499	0.0415857	0.898563	0.138842	0.652624	0.328931	0.332665	-0.307421	0.251887	0.192045	0.51699
	AT1G72190	D-isomer specific 2-hydroxyacid dehydrogenase family protein;(source:Araport11)	2	-1.0989	0.00168643	-1.30758	0.000340991	-0.494625	0.192004	-1.06154	0.00066546	-0.606129	0.03964	-0.0221884	0.957363	0.331295	0.378589	0.0286869	0.950302	-0.31111	0.320395	-0.0289656	0.948699	-0.161135	0.622108	-0.0142721	0.971806
	AT2G37500	arginine biosynthesis protein ArgJ family;(source:Araport11)	2	-0.90491	0.000394761	-0.571424	0.0127646	-0.551291	0.0536834	-0.97592	0.000171961	-0.957218	0.000287848	-0.250313	0.337041	-0.0651209	0.836517	-0.354071	0.245858	-0.145231	0.628956	-0.106825	0.775211	0.614206	0.00940688	0.235002	0.350027
	AT4G14910	Encodes a protein that is predicted to act as a imidazoleglycerol-phosphate dehydratase involved in histidine biosynthesis	2	-0.979784	0.000605579	-0.683941	0.0090819	-0.325454	0.213828	-1.19573	0.000222745	-1.08403	0.000812049	-0.494975	0.025903	-0.405169	0.0820393	-0.288762	0.31964	-0.488656	0.0699259	0.190462	0.539161	-0.272932	0.192477	-0.19407	0.405204
	AT4G11640	Serine racemase, which is a bifunctional PLP-dependent enzyme catalyzing racemization of serine and dehydration of serine to pyruvate in the same way as mammalian serine racemases. similar to mammalian serine racemases.	2	-1.74977	0.00438815	-0.677517	0.191646	-0.647948	0.257992	-1.96477	0.00458761	-3.09756	0.00134799	-0.871576	9.69336e-06	-0.655441	0.000427619	-0.52062	0.402222	-0.678289	0.132374	-1.32312	0.0375951	0.414334	0.00774891	0.247491	0.125521
	AT3G26900	Encodes a protein with some sequence similarity to shikimate kinases, but a truncated form of this protein (lacking a putative N-terminal chloroplast transit peptide) does not have shikimate kinase activity in vitro. skl1-3 mutants have a variegated phenotype and skl1-8 mutants have an albino phenotype consistent with the observation of chloroplast defects in these mutants.	2	-1.2185	0.000702656	-1.10476	0.00139308	-1.00051	0.000288163	-1.84939	1.84834e-05	-1.53903	0.0002161	-0.982463	2.37307e-05	-1.04209	3.00079e-05	-0.617487	0.016172	-0.650729	0.0119911	-0.17182	0.559163	-0.517037	0.00640539	-0.483985	0.0157814
	AT5G04140	Encodes a gene whose sequence is similar to ferredoxin dependent glutamate synthase (Fd-GOGAT). Expression in leaves is induced by light and sucrose. Proposed to be involved in photorespiration and nitrogen assimilation. The mRNA is cell-to-cell mobile.	2	-1.3547	0.49285	-0.933689	0.647837	-1.0261	0.000531617	-2.03926	0.256134	-1.64974	0.396623	-0.70644	0.00194877	-0.66381	0.00510401	-0.878737	0.00422021	-1.58622	6.3002e-06	-0.662712	0.0265059	-0.598257	0.00573156	-0.590035	0.0103522
	AT5G35630		2	-0.762653	0.619946	-0.429066	0.790973	-1.00213	0.000278692	-1.76869	0.189236	-1.42465	0.323946	-0.733682	0.0857044	-0.350909	0.441137	-0.804273	0.00405376	-0.143952	0.566651	-0.325769	0.22458	0.435416	0.273119	0.367628	0.401656
	AT2G43750	Arabidopsis thaliana O-acetylserine (thiol) lyase (OAS-TL) isoform oasB, the key enzyme for fixation of inorganic sulfide. It catalyzes the formation of cysteine from O-acetylserine and inorganic sulfide. Required for pollen tube growth and/or fertilization.	2	-1.03149	0.102148	-0.757013	0.229721	-1.5803	1.57893e-06	-1.76338	0.00576271	-1.51878	0.0195579	-0.955075	0.00310757	-0.93221	0.00548921	-0.794026	0.00235545	0.241003	0.278809	0.0639376	0.826099	-0.328466	0.240834	-0.349709	0.250775
	AT5G48220	Aldolase-type TIM barrel family protein;(source:Araport11)	2	-1.1323	0.000812583	-1.0396	0.00144556	-1.55724	6.20292e-05	-1.8245	3.36788e-05	-1.49337	0.000443159	-0.708431	0.000361486	-0.584431	0.00324341	-0.349699	0.26467	0.22909	0.444326	-0.47577	0.171941	-0.659517	0.00048503	-0.726491	0.000363798
Lipid metabolism	AT5G27600	Encode peroxisomal long-chain acyl-CoA synthetase. Activates fatty acids for further metabolism. Interacts with PEX5.	6	2.18644	6.98466e-07	1.89543	8.97756e-07	2.24363	8.59934e-07	3.00067	1.37629e-08	2.4121	6.53825e-08	1.73858	1.77719e-06	1.75053	4.82903e-06	0.676291	0.0577127	-0.0866405	0.760432	0.0217929	0.954735	3.62652	1.43307e-11	1.9544	3.03677e-07
	AT2G30550	Encodes a lipase that hydrolyzes phosphatidylcholine, glycolipids as well as triacylglycerols.	6	2.26197	6.13752e-05	1.33901	0.00142059	3.36988	3.62713e-08	1.92895	0.000441113	2.0585	0.000378077	2.36321	1.3895e-06	1.68249	0.000143509	0.634213	0.0772307	-0.181111	0.586175	-0.330484	0.37129	3.71485	7.51608e-10	2.49482	5.52579e-07
	AT1G47480	alpha/beta-Hydrolases superfamily protein;(source:Araport11)	6	1.91431	0.000342369	1.51077	0.000949618	2.73855	0.000329506	2.24732	0.000526332	2.44267	0.000544371	1.63298	0.0028231	1.37518	0.0144517	1.21027	0.122539	0.190244	0.836563	0.799415	0.38707	2.14482	2.20615e-05	1.07402	0.024019
	AT1G48320	Encodes one of the two functional DHNA-CoA (1,4-dihydroxy-2-naphthoyl-CoA) thioesterases found in Arabidopsis.	6	2.73342	6.74354e-08	3.63132	1.21148e-08	2.93199	3.0115e-06	2.21521	2.97102e-06	1.83214	1.50241e-05	1.2381	6.86695e-05	0.617585	0.0281709	0.221557	0.736951	-1.80374	1.7194e-05	-0.213866	0.487345	2.55024	1.90468e-09	1.38452	1.9762e-05
	AT1G71697	Encodes choline kinase. mRNA levels are increased in response to wounding. The mRNA is cell-to-cell mobile.	6	2.83976	7.87512e-06	3.37717	1.88516e-06	2.12043	1.30033e-05	3.08636	8.92707e-07	2.97278	1.79521e-06	1.07772	0.000104724	1.03322	0.000319832	1.29553	0.00375473	1.13157	0.00039776	0.457078	0.153141	0.930227	0.000287584	1.05223	0.000161172
	AT5G54500	Encodes a flavin mononucleotide-binding flavodoxin-like quinone reductase that is a primary auxin-response gene.	6	2.87899	3.95625e-06	2.8354	2.97809e-06	2.03004	1.87753e-07	3.07613	4.4143e-07	2.73787	1.45631e-06	0.0480988	0.848151	0.151795	0.55424	0.811837	0.00326532	0.199957	0.386561	0.106547	0.708221	1.16885	1.22035e-05	0.926142	0.000332388
	AT3G19260	LAG1 homolog. Loss of function mutant is sensitive to AAL-toxin. LOH2 is presumed to function in sphingolipid metabolism. It encodes a ceramide synthase essential for production of LCFA-ceramides (mainly C16).	6	1.87277	6.13752e-05	2.07658	1.67873e-05	2.1332	1.15954e-05	3.66995	1.31418e-08	3.12561	3.25315e-08	0.274933	0.279754	0.153975	0.595357	-0.240529	0.659541	0.571927	0.0883493	0.238036	0.581033	1.69113	4.70691e-07	1.11141	0.000173122
	AT1G80460	Encodes a protein similar to glycerol kinase, which converts glycerol to glycerol 3-phosphate and performs a rate-limiting step in glycerol metabolism. This gene is required for both general and specific resistance against bacteria and fungi. Arabidopsis thaliana glycerol kinase (GLR1) mRNA.Involved in flagellin-induced non-host resistance to Pseudomonas. Coronatine partially suppresses flagellin…	6	2.86987	0.00140204	2.73232	0.00207155	1.4601	1.52239e-05	2.97313	0.0005621	2.69973	0.00148705	0.331825	0.0722927	0.560466	0.00621845	0.914431	0.00263905	0.718168	0.00882089	0.226663	0.449404	3.59188	1.26066e-13	2.15693	2.12005e-10
	AT1G52760	Encodes caffeoyl shikimate esterase and is involved in lignin biosynthesis. CSE converts caffeoyl shikimate to caffiate. Loss of function mutations have reduced lignin content and collapsed vessel elements. It is also reported to function as a lysophospholipase 2 (LysoPL2) involved in tolerance to cadmium-induced oxidative stress. Binds Acyl-CoA-binding protein 2 (ACBP2).	6	1.34034	0.000280563	2.03111	7.24503e-06	0.672469	0.0728066	3.45377	2.40863e-08	3.11506	6.3296e-08	2.88737	5.04093e-08	1.74653	4.28038e-05	0.653287	0.110821	0.855968	0.00722545	0.129201	0.748066	4.70162	5.17086e-12	2.77923	2.62724e-08
	AT4G01950	putative sn-glycerol-3-phosphate 2-O-acyltransferase	6	3.80031	1.08689e-05	4.2711	5.20025e-06	-0.661605	0.311655	-0.354785	0.628872	-0.633563	0.380468	2.71218	0.0124572	1.986	0.0898479	-2.36335	0.0178782	0.0630174	0.958738	0.389053	0.766792	2.99568	0.000273035	1.78507	0.0333484
	AT1G30370	Encodes a mitochondria-localized class III phospholipase A1 that plays a role in seed viability.	9	6.24062	4.29955e-09	5.96705	1.94133e-09	4.82684	0.0014212	4.45161	7.35928e-09	4.85215	9.9883e-09	0.284492	0.502761	0.939836	0.0305937	2.37514	0.156109	1.67328	0.0519136	-0.329416	0.813204	3.1359	3.51802e-07	3.39568	2.36242e-07
	AT1G68620	alpha/beta-Hydrolases superfamily protein;(source:Araport11)	9	6.26875	2.30048e-07	6.73893	9.51441e-08	5.04052	0.00431861	4.1177	7.04477e-07	3.85241	1.38113e-06	0.213234	0.449702	-0.852042	0.00668965	2.63387	0.178396	-0.982923	0.368792	-0.661692	0.624274	2.28894	1.73611e-07	1.93043	3.83894e-06
	AT3G14075	Mono-/di-acylglycerol lipase, N-terminal;(source:Araport11)	3	0.741885	0.00667063	0.882736	0.00148884	0.183195	0.648003	0.527244	0.0233228	0.518442	0.0306145	1.53156	5.18136e-05	1.28803	0.000579267	0.0388762	0.938187	-0.478151	0.15713	-0.56248	0.160195	4.10828	1.91191e-10	2.62911	3.44792e-07
	AT2G42010	phospholipase D (PLDbeta)	3	1.13412	0.000202323	1.02066	0.000294259	0.627055	0.00630052	1.09014	7.82538e-05	0.946255	0.000356969	0.490773	0.0173209	0.18048	0.418688	0.133922	0.613794	-0.864815	0.00048248	-0.342457	0.158679	3.47254	5.26684e-13	1.87857	7.51415e-09
	AT3G18860	transducin family protein / WD-40 repeat family protein;(source:Araport11)	3	0.387801	0.180958	0.214972	0.442621	0.503688	0.0123994	0.65003	0.0218636	0.550495	0.0536296	-0.359112	0.727909	1.21261	0.13293	0.295174	0.170557	0.267639	0.165701	0.202124	0.367118	3.04561	0.00240008	2.72196	0.00980316
	AT2G47240	Encodes an acyl-CoA synthetase that acts on long-chain and very-long-chain fatty acids, involved in cuticular wax and cutin biosynthesis The mRNA is cell-to-cell mobile.	3	0.0574761	0.895425	-0.127687	0.743752	0.033734	0.942995	0.30993	0.226317	0.497948	0.0751074	0.605613	0.0266167	0.231036	0.439665	-0.869515	0.0683326	0.823386	0.0558529	-0.482121	0.381501	2.45876	5.93516e-09	2.19479	6.83403e-08
	AT3G58490	Encodes a long-chain base 1-phosphate (LCBP) phosphatase that is expressed in the endoplasmic reticulum.	3	-0.243428	0.647823	-0.66001	0.151842	0.364389	0.448478	-0.521643	0.222708	-0.416413	0.36091	0.366978	0.0938121	0.588975	0.0137395	0.974817	0.0458442	-0.334948	0.296761	0.000573313	0.999108	3.43478	2.12873e-12	3.62696	5.05166e-12
	AT1G74960	Encodes a plastidic beta-ketoacyl-ACP synthase II, involved in fatty acid elongation from 16:0-ACP to 18:0-ACP. Homozygous knock-out mutants are embryo lethal, indicating early embryo development is sensitive to elevated 16:0.	3	-1.05177	0.000713575	-0.958875	0.00130732	-1.28012	8.22762e-06	-0.882358	0.00334371	-0.861346	0.00504991	-0.680773	0.0431841	-0.767329	0.0310482	0.156802	0.483878	-1.03416	2.61787e-05	-0.95056	0.000176183	2.27466	7.05126e-08	1.92687	1.4653e-06
	AT2G46210	Fatty acid/sphingolipid desaturase;(source:Araport11)	3	1.24124	0.00794471	1.18135	0.0107626	2.62374	0.0392914	0.379554	0.388052	0.239088	0.610973	-0.586451	0.0305815	-0.114326	0.72111	0.608293	0.738112	1.91934	0.270191	1.52673	0.471737	3.85302	6.34494e-12	3.54734	7.08004e-11
	AT1G06290	Encodes an acyl-CoA oxidase with specificity for medium chain fatty acids. The mRNA is cell-to-cell mobile.	3	0.797598	0.072041	0.461058	0.263048	0.50484	0.00359638	1.37911	0.00274979	1.07716	0.014056	-2.91318	0.0109369	-0.168785	0.821202	0.430256	0.0188512	0.170229	0.295576	0.363643	0.0478071	3.72619	3.29719e-09	1.43455	0.00167864
	AT3G03520	Lysophosphatidic acid phosphatase highly expressed during phosphate starvation and abiotic stresses. Role in lipid synthesis.	3	-0.0188036	0.949799	0.19494	0.443244	0.564825	0.216091	-1.49086	5.35583e-06	-1.14211	0.000174562	0.608022	0.0421626	0.231906	0.485336	0.0775019	0.904011	0.0702994	0.88673	-0.103407	0.867269	8.30229	3.49155e-08	5.59024	1.66038e-05
	AT3G48990	Encodes an oxalyl-CoA synthetase and is required for oxalate degradation, for normal seed development, and for defense against an oxalate-producing fungal pathogen.	4	0.800749	0.468582	1.10086	0.305554	0.401016	0.288381	1.37788	0.147725	1.10829	0.253751	1.38626	4.38173e-06	0.636286	0.0114829	0.291423	0.503241	-0.901745	0.0242517	-0.0820019	0.878635	0.624362	0.00710872	0.460464	0.056213
	AT3G06810	Encodes a protein with similarity to acyl-CoA dehydrogenases. Mutations in IBR3 render plants resistant to indole-3-butryic acid, a putative storage form of the biologically active auxin IAA (indole-3-acetic acid). IBR3 is hypothesized to carry out the second step in a &#946;-oxidation-like process of IBA metabolism in Arabidopsis. Though its subcellular location has not been determined, IBR3 has…	4	0.996758	0.101275	0.870398	0.128813	0.28195	0.231084	1.52381	0.00781923	1.11336	0.0392363	0.608967	0.0039138	0.378647	0.0758052	0.280098	0.28399	-0.1267	0.577415	0.025933	0.932584	0.0999875	0.613423	0.429406	0.038996
	AT4G29010	Functions in beta-oxidation of fatty acids, similar to CuMFP with L-3-hydroxyacyl-CoA hydrolyase , L-3-hydroxyacyl-dehydrogenase, D-3-hydroxyacyl-CoA epimerase, and 3, 2-enoyl-CoA isomerase activities.	4	0.912164	0.263583	0.702187	0.376508	-0.0897992	0.641457	1.65424	0.0150133	1.30135	0.0480131	1.02307	1.92535e-06	0.761046	0.000124365	0.254833	0.19837	0.11	0.588468	-0.155713	0.486003	1.02142	7.41345e-07	1.07109	8.00008e-07
	AT4G16210	enoyl-CoA hydratase/isomerase A;(source:Araport11)	4	0.675515	0.185078	0.551076	0.249674	1.07167	0.000118443	1.16556	0.0133421	1.05129	0.0262274	0.42435	0.0920151	0.606427	0.0255788	0.397111	0.135923	0.331844	0.0907119	0.0338305	0.903148	1.3425	9.83877e-06	0.988009	0.000582865
	AT1G76150	Encodes a monofunctional enoyl-CoA hydratase 2, involved in the degradation of even cis-unsaturated fatty acids, gene expression is enhanced during the first 2 days of germination, as well as in senescent leaves.	4	1.03481	0.00115672	0.574582	0.0271472	0.895352	0.0015539	1.47759	4.14308e-06	1.2314	2.88876e-05	0.00941482	0.962074	0.223128	0.21072	0.283425	0.348822	-0.0788186	0.742968	-0.158329	0.55601	1.05352	9.672e-07	0.800387	6.16572e-05
	AT4G36480	Encodes the LCB1 subunit of serine palmitoyltransferase. Together with the LCB2 subunit, forms a functional serine palmitoyltransferase complex, which catalyzes the first reaction of sphingolipid biosynthesis. Knockout of LCB1 was embryo lethal. Partial suppression of LCB1 expression led to smaller plants due to reduced cell expansion.	4	1.13076	0.000624646	1.03689	0.000799968	0.15676	0.459497	1.06988	0.000131107	0.941965	0.000506478	0.239117	0.337356	0.493013	0.0597347	-0.264597	0.261472	0.775467	0.000275333	0.488335	0.0227278	2.11253	1.35379e-08	1.20922	5.14371e-05
	AT4G22330	AtCES1 encodes a nuclear and endoplasmic reticulum localized Acyl-CoA independent ceramide synthase that is involved in sphingolipid metabolism, disease resistance, nutrient limitation, and response to salt stress. Facilitates adaptation to environmental stresses by regulating autophagy.	4	0.677563	0.329446	0.98357	0.149105	0.228241	0.421804	0.796073	0.105134	0.705396	0.160297	1.08418	1.35656e-05	0.448	0.0353312	-0.0964415	0.787092	1.29928	2.63048e-05	0.346265	0.208826	1.79756	5.62536e-09	0.788756	0.000474229
	AT1G06550	ATP-dependent caseinolytic (Clp) protease/crotonase family protein;(source:Araport11)	4	0.933162	0.000467347	1.38883	1.19904e-05	-0.752365	0.031423	0.738514	0.00820557	0.128217	0.621596	0.616714	0.0133453	0.368422	0.155757	0.00978865	0.980067	0.170544	0.614693	0.367008	0.326878	1.23353	1.88689e-05	0.823707	0.00222114
	AT3G15730	Encodes phospholipase D alpha 1 (PLD alpha 1). Positive regulator of abscisic acid (ABA) mediated stomatal movements. PLD alpha 1 plays an important role in seed deterioration and aging in Arabidopsis. The mRNA is cell-to-cell mobile.	4	0.210954	0.919124	0.658845	0.734738	0.290491	0.138459	0.193255	0.916858	0.216766	0.909329	0.568084	0.00265163	0.344001	0.069308	-0.238473	0.268142	0.450163	0.0309918	0.201211	0.389133	1.6565	3.36065e-09	0.854616	5.79195e-05
	AT4G26690	Glycerophosphoryl diester phosphodiesterase-like protein involved in cell wall cellulose accumulation and pectin linking. Impacts root hair, trichome and epidermal cell development.	4	1.12474	0.00371579	1.28358	0.00115756	-0.850392	0.00085463	1.00185	0.0228875	0.600813	0.155657	-1.2654	0.280693	0.524544	0.55216	-0.165968	0.518529	0.435651	0.0616184	0.943555	0.00102649	-0.198996	0.911343	1.76272	0.207071
	AT4G14430	Encodes a peroxisomal delta3, delta2-enoyl CoA isomerase, involved in unsaturated fatty acid degradation. This enzyme might also be involved in the conversion of indole-3-butyric acid to indole-3-acetic acid via a beta-oxidation-like pathway.	4	1.63003	9.38766e-05	1.42179	0.000151203	0.957946	0.00349403	0.998241	0.00324793	0.880151	0.00876497	-0.0808112	0.73194	-0.269118	0.248236	-0.29337	0.431324	-0.942011	0.00356784	-0.210281	0.551501	1.30507	2.53489e-06	0.541099	0.0210281
	AT1G77420	alpha/beta-Hydrolases superfamily protein;(source:Araport11)	4	1.14439	3.83029e-05	1.32776	5.81082e-06	1.1264	0.00238328	1.39258	1.54294e-06	1.25449	5.79773e-06	-0.459619	0.309506	-0.86127	0.0728179	0.00321564	0.99489	-0.461082	0.195037	-0.0780622	0.870588	0.491028	0.238664	1.05802	0.0190332
	AT4G36750	Quinone reductase family protein;(source:Araport11)	4	1.52426	0.000171425	1.51597	0.00010244	0.516755	0.0379575	0.881685	0.0016587	1.06061	0.000636588	-1.05534	8.25529e-05	-0.399121	0.0984125	-0.061044	0.857062	-0.506873	0.0275872	-1.37331	8.00491e-05	0.234946	0.278975	-0.0174995	0.950339
	AT2G33630	NAD(P)-binding Rossmann-fold superfamily protein;(source:Araport11)	4	0.667553	0.259785	0.535557	0.339592	0.880523	0.000601162	1.17335	0.0431976	1.20845	0.0454846	-0.819994	0.00227259	-0.367108	0.169057	0.0860052	0.771531	-0.326826	0.140904	0.155577	0.55734	-0.168112	0.489862	0.0837296	0.768576
	AT4G04320	malonyl-CoA decarboxylase family protein;(source:Araport11)	4	0.766354	0.00290774	0.692348	0.00388618	0.474739	0.0979123	0.822851	0.00123882	0.349834	0.112652	-0.352486	0.119103	-0.393057	0.102961	0.458276	0.145398	-0.384454	0.130519	0.172489	0.566191	-0.278492	0.19653	0.0655458	0.802675
	AT4G27780	Encodes acyl-CoA-binding protein with ankyrin repeats The mRNA is cell-to-cell mobile.	4	0.729696	0.0122201	0.3161	0.203446	0.959234	0.0462525	1.26498	1.76352e-05	1.05749	0.000114072	0.762055	0.267725	-0.284805	0.762367	0.303465	0.616478	-0.427896	0.22408	-0.760172	0.0780168	-0.257961	0.632005	0.133078	0.819706
	AT1G68000	phosphatidylinositol synthase 1	4	0.653829	0.0921747	0.0877592	0.817991	0.652252	0.0674224	0.526199	0.0884371	0.501958	0.114946	0.238705	0.252592	0.373483	0.0897939	0.230122	0.600262	-0.458934	0.11166	-0.0342013	0.932584	-0.0416607	0.8459	0.0636327	0.788306
	AT5G16120	alpha/beta-Hydrolases superfamily protein;(source:Araport11)	4	-0.114895	0.883631	0.244341	0.746256	-0.0348222	0.911038	0.595373	0.315674	0.403529	0.515585	-0.0434743	0.935795	0.0392947	0.948267	0.502783	0.0684668	-0.092664	0.65196	0.0651812	0.796602	-0.0357797	0.929277	0.136544	0.748964
	AT3G10370	mitochondrial FAD-dependent glycerol-3-phosphate dehydrogenase. possibly involved in storage lipid catabolism and glycerol assimilation, and in glycerol-3-phosphate shuttle which transports reducing power from cytosol to mitochondrion.	4	0.472478	0.131437	0.394498	0.185113	-0.071777	0.769651	0.165291	0.577502	-0.175311	0.557122	-0.173308	0.259042	-0.196426	0.231233	-0.309433	0.202885	0.365631	0.0935967	-0.0273705	0.930263	0.652053	0.000116584	0.408511	0.0113376
	AT5G42890	sterol carrier protein 2;(source:Araport11)	4	0.138444	0.701524	-0.0235497	0.948682	0.437295	0.23182	0.66112	0.0255993	0.289267	0.307622	-0.362702	0.044799	-0.450659	0.0202849	-0.768079	0.106189	-0.0121046	0.976813	0.215134	0.611543	0.552628	0.00259589	0.701055	0.000609655
	AT2G32260	phosphorylcholine cytidylyltransferase;(source:Araport11)	4	0.682895	0.0700565	0.700314	0.053744	0.660605	0.000605905	0.483364	0.137223	0.205055	0.544063	-0.53942	0.00363297	-0.285479	0.128232	0.466858	0.0159831	0.880213	2.02628e-05	0.270963	0.133441	0.0342014	0.851123	-0.140313	0.454187
	AT5G23450	Encodes a sphingosine kinase that specifically phosphorylates D-erythro-dihydrosphingosine (DHS), but not N-acetyl-DHS or D-threo-DHS. It also also phosphorylates D-erythro-sphingosine, trans-4, trans-8-sphingadienine and phytosphingosine.	4	0.476102	0.475538	0.453977	0.476479	0.166421	0.218011	0.322272	0.589626	0.198624	0.755392	-0.233338	0.143656	-0.154391	0.38048	0.183012	0.219205	-0.111894	0.431821	-0.407768	0.0105384	0.17865	0.241249	-0.0417311	0.823149
	AT1G24360	NAD(P)-binding Rossmann-fold superfamily protein;(source:Araport11)	4	0.432107	0.104915	0.612121	0.0219003	0.704213	0.000872929	0.294158	0.318624	0.195161	0.533713	-0.304512	0.0530698	-0.24329	0.146823	0.0853603	0.719959	0.293886	0.139829	-0.799368	0.00261228	-0.290813	0.0537663	-0.211525	0.19368
	AT1G74210	Encodes a member of the glycerophosphodiester phosphodiesterase (GDPD) family.	4	-0.222045	0.580538	-0.579848	0.100978	2.09854	1.41464e-06	1.54603	0.00111113	1.7884	0.000727583	-0.240664	0.374115	0.112111	0.723276	0.805644	0.0207798	0.262686	0.353571	0.904591	0.00548788	0.615954	0.0175936	1.67794	2.31905e-06
	AT4G00550	encodes a UDP-galactose-dependent digalactosyldiacylglycerol(DGDG) synthase. Located in chloroplast outer membrane.	4	0.828431	0.0432538	0.975532	0.0166261	1.38845	3.83766e-05	1.67772	0.000545466	1.68028	0.000768137	0.0545202	0.795125	-0.347983	0.085982	0.335792	0.291574	1.02566	0.000516975	0.684923	0.0241016	-1.20599	1.16421e-06	-0.0317125	0.891448
	AT2G19450	Encodes Acyl-CoA:diacylglycerol acyltransferase (DGAT) catalyzes the final step of the triacylglycerol synthesis pathway. An insertion mutation in the TAG1 gene results in altered lipid phenotype. Role in senescence and seed development. Its preferred substrate is linolenoyl-CoA (C18:3-CoA).	4	0.636436	0.699818	0.78085	0.619401	-0.18624	0.455612	3.88381	0.000227972	1.54806	0.0419133	0.578939	0.00926628	0.346663	0.130828	-3.17297	2.54443e-06	0.639797	0.0168552	0.136063	0.690712	1.15943	8.64115e-06	0.268366	0.232298
	AT5G36880	Encodes a plastidic acetyl-coA synthetase. This enzyme plays a role in converting acetate to acetyl-coA in the plastids. It does not appear to be a major contributor to fatty acid biosynthesis based on mutant phenotypes. The enzyme seems to act as a monomer and may play an important role in preventing the toxic accumulation of fermentation products including acetaldehyde, acetate, and ethanol. It…	4	1.6963	0.0494466	2.16376	0.0159232	1.1604	1.01164e-05	1.53538	0.065799	1.30453	0.117954	0.381239	0.0663474	0.117851	0.623046	0.400695	0.060263	0.670665	0.00213327	0.00582772	0.983087	1.37481	5.45085e-07	0.81491	0.000551063
	AT2G20900	diacylglycerol kinase 5;(source:Araport11)	4	1.49083	0.000643098	1.2879	0.00110988	0.976073	0.00181994	1.10551	0.000377212	1.175	0.0003436	0.192044	0.300231	0.131435	0.524517	0.393983	0.231957	0.131017	0.617529	-0.0348329	0.922343	1.96792	4.49918e-10	1.19806	1.39382e-06
	AT4G23850	AMP-dependent synthetase and ligase family protein;(source:Araport11)	4	1.38822	0.293315	1.35023	0.284423	1.5471	1.20075e-05	2.44345	0.0521679	2.11018	0.0885564	0.13038	0.411829	0.052497	0.7815	0.60266	0.0373402	0.325389	0.235114	-0.327826	0.283764	1.83264	9.1909e-11	1.16709	1.76108e-07
	AT5G65110	Encodes an acyl-CoA oxidase presumably involved in long chain fatty acid biosynthesis.	4	1.45388	0.100561	1.44323	0.0897205	0.59359	0.0149776	2.018	0.00381943	1.33032	0.0315399	-0.321162	0.0785782	-0.0747719	0.732917	0.545415	0.0385957	-0.536645	0.024715	-0.311154	0.24042	1.53193	1.4282e-08	1.06329	4.92618e-06
	AT1G65520	encodes a peroxisomal delta3, delta2-enoyl CoA isomerase, involved in unsaturated fatty acid degradation	4	2.49253	3.55862e-05	1.89449	8.17223e-05	1.43949	0.00112938	1.37019	0.00291971	1.38601	0.00359867	-0.234639	0.457981	-0.427626	0.191925	1.41041	0.00294881	0.668868	0.111122	0.423668	0.412219	1.30348	0.000202976	0.325841	0.345254
	AT4G16760	Encodes a medium to long-chain acyl-CoA oxidase. Catalyzes the first step of fatty acid beta-oxidation. Involved in jasmonate biosynthesis. Gene expression is induced by wounding, drought stress, abscisic acid, and jasmonate.	4	2.26466	0.0205043	3.06331	0.004585	0.85202	0.00283245	1.83041	0.0331945	1.36057	0.0988372	1.10882	1.56816e-06	0.5739	0.00266275	-0.260431	0.397128	-1.13597	0.00024734	-0.420275	0.159936	0.263112	0.0977024	0.217892	0.207026
	AT1G15110	PSS1 encodes a base-exchange-type Phosphatidylserine (PS) synthase. Mutant analysis revealed its role in pollen maturation.	4	2.06596	1.0708e-05	1.81291	9.42055e-06	0.835555	0.291164	1.15251	0.00012924	1.16743	0.000178309	0.200122	0.291621	0.515243	0.0120808	1.19732	0.148104	-0.830619	0.0951823	-0.851059	0.153261	-0.459952	0.0129048	-0.0599138	0.781305
	AT5G16370	acyl activating enzyme 5;(source:Araport11)	4	2.79855	0.0279969	2.59044	0.0313756	1.0915	0.00230474	2.91114	0.00273738	2.7199	0.00471371	-0.611114	0.0288062	-0.150292	0.637543	0.853046	0.0228091	-1.06494	0.000742857	-0.730747	0.0224507	0.129316	0.636985	0.557703	0.0514416
	AT4G24230	acyl-CoA-binding protein ACBP3. Localized extracellularly in transiently expressed tobacco BY-2 cells and onion epidermal cells. Binds arachidonyl-CoA with high affinity. Microarray data shows up-regulation of many biotic- and abiotic-stress-related genes in an ACBP3 OE-1 in comparison to wild type.	4	1.65075	0.181414	1.44746	0.21241	-0.81129	0.215765	2.96999	0.000330357	2.40448	0.00122054	0.699359	0.0418457	0.438901	0.23211	0.97912	0.10831	-1.2362	0.0115932	-1.79979	0.00181028	3.63039	1.23293e-09	2.54845	4.83817e-07
	AT1G02660	PLIP2 is a glycerolipid A1 lipase with substrate preference for monogalactosyldiacylglycerol. Expression is induced by ABA.	4	1.99894	0.000591721	1.58827	0.00165883	0.560976	0.148632	2.46198	1.15644e-07	1.89081	9.80526e-07	-1.335	3.6736e-05	-0.451217	0.114108	0.986242	0.0196477	-1.87403	2.67846e-06	-1.24502	0.000479699	3.02365	3.65174e-10	2.10856	1.79221e-07
	AT1G07380	Encodes a neutral ceramidase that is involved in sphingolipid homeostasis and responses to oxidative stress.	4	0.437824	0.160249	0.685011	0.0293589	0.746726	0.061957	1.54756	2.03633e-06	1.26966	1.51974e-05	2.12514	2.69986e-08	1.76042	7.71567e-07	1.23207	0.00594306	-1.13626	0.000505795	-0.535975	0.092443	0.894918	0.000248016	1.18154	2.2583e-05
	AT2G43420	3-beta hydroxysteroid dehydrogenase/isomerase family protein;(source:Araport11)	4	0.447951	0.0686397	0.316099	0.16804	0.970565	0.00258075	1.02901	0.000129284	0.858164	0.000751573	1.25225	0.348401	2.67083	0.03832	0.658769	0.0509921	0.733913	0.0153364	0.79131	0.0205867	-0.54783	0.5662	-0.489806	0.633432
	AT3G05630	Encodes a member of the PXPH-PLD subfamily of phospholipase D proteins. Regulates vesicle trafficking. Required for auxin transport and distribution and hence auxin responses. This subfamily is novel structurally different from the majority of plant PLDs by having phox homology (PX) and pleckstrin homology (PH) domains. Involved regulating root development in response to nutrient limitation. Play…	4	0.987611	0.0474389	1.3443	0.00964204	1.18015	0.061999	0.552119	0.206032	0.760537	0.102395	1.08672	0.0426489	0.484376	0.408545	0.491424	0.531303	-1.19482	0.0458422	-1.0688	0.127523	-2.08641	0.000309404	1.63881	0.00502579
	AT1G06520	sn-glycerol-3-phosphate 2-O-acyltransferase. Expressed in flower buds and siliques. Homozygous mutant plants are male sterile.	4	1.31229	0.00547179	0.485213	0.212169	-2.57859	0.215551	1.4552	0.00403136	1.10508	0.0201903	0.9055	0.0676287	1.42582	0.00645438	-0.136286	0.939908	-0.290804	0.678644	-1.04766	0.248741	-0.144113	0.775783	0.0162883	0.977558
	AT3G03310	lecithin:cholesterol acyltransferase 3;(source:Araport11)	4	0.177214	0.433387	-0.0198932	0.932956	0.967586	0.0553823	0.443768	0.0551433	0.314516	0.179845	-0.110242	0.808986	-0.185888	0.703034	0.267938	0.681755	-0.280196	0.501	-0.861932	0.0909213	0.0855122	0.838305	1.92263	6.45519e-05
	AT3G23790	AMP-dependent synthetase and ligase family protein;(source:Araport11)	4	-0.814894	0.0608643	-1.37046	0.00256938	0.516197	0.358093	0.364778	0.288181	0.50596	0.155482	0.352105	0.135062	0.234126	0.366134	0.431768	0.500834	-0.220104	0.537244	-0.108907	0.811462	0.379424	0.155155	0.664911	0.020667
	AT3G51840	Encodes a short-chain acyl-CoA oxidase, which catalyzes the first step of peroxisomal fatty acid beta-oxidation during early, post-germinative growth in oilseed species. Null mutants virtually lack short-chain acyl-CoA and are resistant to 2,4-dichlorophenoxybutyric acid, which is converted to the herbicide and auxin analogue 2,4-dichlorophenoxyacetic acid by beta-oxidation. Despite the almost co…	4	-0.405869	0.811178	-0.579445	0.714306	-0.14221	0.598383	1.05471	0.383764	0.609025	0.624389	-0.101147	0.587375	-0.178994	0.356101	1.40665	7.10664e-05	-1.45998	2.98738e-05	-0.933663	0.00432031	0.978212	5.0938e-06	0.503512	0.00701041
	AT4G13550	Heat stress inducible plastid monogalactosyldiacylglycerol lipase.	4	-0.083826	0.729932	-0.257544	0.21876	-0.759805	0.00195983	0.76574	0.0103683	0.404174	0.150796	-0.202925	0.51588	-0.2657	0.418815	0.764606	0.0024647	-1.19138	2.39046e-05	-0.678232	0.00778221	-1.96455	1.96515e-07	-0.731345	0.011104
	AT5G18640	alpha/beta-Hydrolases superfamily protein;(source:Araport11)	4	-0.841839	0.0940554	-1.25006	0.0103283	-0.672201	0.0183153	0.509018	0.134479	0.260268	0.455241	-0.971124	0.000279345	-0.271193	0.288209	0.0662355	0.844885	-1.10042	9.29905e-05	-0.680639	0.0110995	0.73716	0.00225023	0.370699	0.127772
	AT5G58560	FOLK is a farnesol kinase that can phosphorylate farnesol using an NTP donor. It can also phosphorylate geraniol, or geranylgeraniol, but it prefers farnesol in experiments performed using yeast membranes. folk loss-of-function mutants show ABA hypersensitivity in a seed germination assay and the mutants also exhibit abnormal flower development, including extra carpel formation, when subjected to…	4	-0.856381	0.0255455	-0.828266	0.0258426	-0.0933617	0.732649	-0.469004	0.254027	-0.427828	0.323818	-1.44942	1.64535e-07	-0.927462	6.79062e-05	-0.106753	0.72459	-0.356039	0.106963	-0.0634087	0.828282	0.380779	0.0309882	0.469731	0.0149132
	AT1G20560	acyl activating enzyme 1;(source:Araport11)	4	-1.11369	0.00927572	-1.2268	0.0038266	-0.683569	0.0385936	-0.28657	0.427354	-0.395564	0.284856	-1.26282	0.000149119	-1.02286	0.00179116	0.105032	0.781116	-1.54223	3.09627e-05	-1.0209	0.00293763	-1.09383	0.000414875	0.174522	0.581637
	AT3G57650	Encodes an endoplasmic reticulum localized protein with lysophosphatidyl acyltransferase activity.	4	-0.116378	0.685808	-0.26694	0.295011	-0.00868109	0.973692	-0.105943	0.670252	0.101918	0.706521	-1.8413	0.000184898	-1.4514	0.00127453	-0.0236131	0.936685	0.360759	0.100683	0.41057	0.100066	-0.514988	0.113662	-0.320204	0.367076
	AT5G35930	AMP-dependent synthetase and ligase family protein;(source:Araport11)	4	-0.764016	0.028268	-0.80388	0.0182161	-0.350932	0.252791	-0.0034836	0.991723	-0.277542	0.361661	-1.41319	0.000855647	-0.265802	0.502007	0.0811109	0.825914	-0.0135972	0.962879	0.298194	0.288596	-0.932795	0.00861361	-0.331979	0.360545
	AT1G73920	alpha/beta-Hydrolases superfamily protein;(source:Araport11)	4	0.0887791	0.92097	0.423172	0.602285	-1.18972	4.32603e-05	-0.492736	0.487469	-0.546077	0.4589	-1.46906	4.35228e-06	-0.909827	0.0012991	-0.0158009	0.959004	-0.0613649	0.818196	-0.0631241	0.841195	-0.0538664	0.830802	-0.12275	0.648461
	AT5G58800	Quinone reductase family protein;(source:Araport11)	4	0.108164	0.701231	-0.0566796	0.836872	-0.993643	0.00302342	-0.372825	0.0812006	-0.739281	0.00143426	-1.45106	0.000202071	-0.872748	0.0183699	-0.848634	0.01353	-1.31231	3.48066e-05	-0.517519	0.0590453	0.0725872	0.837509	-0.0127242	0.97547
	AT1G27980	dihydrosphingosine phosphate lyase;(source:Araport11)	7	1.34371	0.00216981	1.1889	0.00341258	2.60579	0.000366969	3.96262	4.62406e-09	3.52644	1.09143e-08	-1.00269	1.18412e-05	-0.704341	0.000908549	2.0719	0.00566556	0.535011	0.148752	-0.215293	0.647	0.48639	0.00722456	0.322501	0.0855695
	AT5G14180	Myzus persicae-induced lipase 1;(source:Araport11)	7	0.88022	0.171285	0.27751	0.633086	0.497462	0.951179	4.07192	1.54315e-06	3.79088	2.95461e-06	-0.720085	0.209099	-1.12753	0.0756631	4.89536	0.417737	-1.94412	0.0419068	-0.320918	0.748544	0.773392	0.248584	0.703622	0.341047
	AT5G07010	Encodes a sulfotransferase that acts specifically on 11- and 12-hydroxyjasmonic acid. Transcript levels for this enzyme are increased by treatments with jasmonic acid (JA), 12-hydroxyJA, JA-isoleucine, and 12-oxyphytodienoic acid (a JA precursor).	7	1.08464	0.520068	0.870297	0.609381	0.880009	0.449113	3.92705	7.36729e-05	2.30641	0.000791399	0.242627	0.86421	-0.275219	0.867855	3.21824	0.0053471	0.45962	0.33284	0.450133	0.405392	-4.36753	3.04119e-06	-1.92131	0.000287433
	AT5G41080	Encodes a member of the glycerophosphodiester phosphodiesterase (GDPD) family.	7	2.81972	0.00127157	2.82254	0.000631796	1.05993	0.770665	4.01629	0.00290231	3.35152	0.0114456	2.0196	0.000709045	1.86427	0.00237361	-0.17968	0.969257	-2.29943	0.200986	-0.0317568	0.986159	-0.290494	0.622971	2.03593	0.000926621
	AT2G28630	Encodes KCS12, a member of the 3-ketoacyl-CoA synthase family involved in the biosynthesis of VLCFA (very long chain fatty acids).	7	1.88279	0.0437411	2.03715	0.0262642	-1.20173	0.168015	4.49136	0.00016501	4.67381	0.000245644	2.07113	0.000323961	0.731535	0.195333	1.11098	0.125925	-2.00094	0.000550979	-0.57153	0.316728	-2.10938	0.000328653	-1.27111	0.012576
	AT5G59310	Encodes a member of the lipid transfer protein family. Proteins of this family are generally small (~9 kD), basic, expressed abundantly and contain eight Cys residues. The proteins can bind fatty acids and acylCoA esters and can transfer several different phospholipids. They are localized to the cell wall. The mRNA is present in flowers and siliques, and is strongly up-regulated by abscisic acid.…	7	1.88642	0.0447005	1.28748	0.185106	-5.06379	0.144411	3.39952	0.0125431	2.23376	0.0366961	-1.39879	8.3235e-07	-1.23234	1.01897e-05	-0.750857	0.693969	0.927035	0.813556	3.63102	0.307974	0.328478	0.0910878	0.158318	0.468805
	AT5G40610	NAD-dependent glycerol-3-phosphate dehydrogenase family protein;(source:Araport11)	5	-3.3854	1.48134e-05	-2.70583	9.6595e-05	-2.60526	0.00108428	-3.39782	1.02668e-05	-3.22511	1.85396e-05	2.26156	1.7036e-06	1.10097	0.00438868	-0.283017	0.552799	1.37971	0.07022	0.634926	0.518642	3.04075	1.31624e-08	0.843407	0.0239474
	AT2G17650	AMP-dependent synthetase and ligase family protein;(source:Araport11)	5	-3.14236	7.27076e-05	-2.33757	0.000849464	-2.28193	0.00250128	-3.55778	1.84144e-05	-3.2644	3.06841e-05	1.9369	7.82234e-07	1.70607	9.48888e-06	-0.339973	0.497257	-1.49179	0.000220994	-1.1471	0.00473344	4.04885	4.36475e-12	3.51679	1.00238e-10
	AT1G04010	phospholipid sterol acyl transferase 1;(source:Araport11)	1	-0.491289	0.0374471	-0.674914	0.0040904	0.21733	0.473445	0.00820546	0.973269	-0.0107261	0.96784	0.30051	0.144807	0.0641372	0.80118	-0.0318673	0.936392	0.592937	0.0376973	0.557153	0.088343	1.6192	5.40257e-08	0.890586	0.000226085
	AT5G58980	Neutral/alkaline non-lysosomal ceramidase;(source:Araport11)	1	-0.679368	0.107867	-0.432415	0.308709	0.219002	0.43767	0.599839	0.218495	0.222865	0.659148	-0.249189	0.628577	-0.090781	0.877663	-0.0461177	0.901671	0.272946	0.267796	0.702632	0.0134745	1.03976	0.0150876	0.874048	0.0537381
	AT1G01020	ARV1 family protein;(source:Araport11)	1	0.0382336	0.912734	-0.134592	0.661366	-0.136068	0.864117	-0.490853	0.075623	-0.471995	0.0969222	-0.368755	0.326383	-0.367346	0.35597	-0.594295	0.494235	0.572765	0.323872	0.472539	0.507668	1.20196	0.0237579	1.85961	0.00114451
	AT1G01710	acyl-CoA thioesterase II;(source:Araport11)	1	-0.197637	0.599701	0.135213	0.728766	-0.303323	0.249423	-0.131698	0.73881	-0.139987	0.736909	-0.595538	0.0495813	-0.158276	0.644075	-0.072616	0.826978	-0.20803	0.397163	0.341525	0.208676	2.4988	1.36286e-08	0.653618	0.0324614
	AT5G46290	Encodes beta-ketoacyl-[acyl carrier protein] synthase I (KASI). Crucial for fatty acid synthesis. Plays a role in chloroplast division and embryo development.	1	0.36552	0.191285	0.931533	0.00278957	-0.779468	0.0112523	-0.425392	0.132448	-0.476033	0.102287	0.686748	0.00805286	0.890304	0.00177156	-0.833331	0.0135348	0.516125	0.126953	0.368363	0.358988	1.60818	7.02771e-07	1.47503	4.48908e-06
	AT5G20060	alpha/beta-Hydrolases superfamily protein;(source:Araport11)	1	-0.281036	0.310373	0.0096735	0.97594	-0.886701	0.0217201	-0.638166	0.0210341	-0.711859	0.012891	-0.415109	0.443227	0.423772	0.391617	-0.62517	0.113697	0.202317	0.648444	0.651493	0.160888	2.79158	2.97736e-06	2.32027	6.39193e-05
	AT1G04290	Thioesterase superfamily protein;(source:Araport11)	1	0.230737	0.55155	0.111621	0.785652	-0.484151	0.383217	-0.571225	0.127114	-1.20443	0.00316055	-0.842138	2.1573e-05	-0.457817	0.00952629	-2.65176	0.0111908	0.350373	0.565831	0.359979	0.625945	0.356117	0.0226743	0.377445	0.024947
	AT1G14290	Encodes one of the two redundant sphingoid base hydroxylases (SBH). Involved in sphingolipid trihydroxy long-chain base (4-hydroxysphinganine) biosynthesis. Double mutants of SBHs were dwarfed and not able to progress from vegetative to reproductive growth.	1	-1.25262	0.000153921	-1.17831	0.00022458	-2.45209	3.45152e-05	-1.99475	1.73379e-07	-2.16673	8.93934e-08	0.790341	0.00209376	0.441056	0.0839246	-1.3898	0.00129445	-0.16605	0.577247	0.0378527	0.924459	2.2902	2.60875e-09	1.93355	6.88481e-08
	AT3G15850	Chloroplastic enzyme responsible for the synthesis of 16:1 fatty acids from galactolipids and sulpholipids. Uses ferredoxin as electron donor. The mRNA is cell-to-cell mobile.	1	-1.07302	0.196089	-1.11671	0.163717	-3.10083	7.62854e-07	-2.77569	0.00452829	-2.59688	0.00905376	-0.0233127	0.924041	0.292848	0.201571	-1.24454	0.00193909	-0.584616	0.0835698	-0.587117	0.129499	2.80903	1.43558e-11	2.64532	1.10691e-10
	AT2G41540	Encodes a protein with NAD-dependent glycerol-3-phosphate (G3P) dehydrogenase which was shown to complement an Escherichia coli strain: BB20-14, auxotrophic for glycerol/G3P due to a loss-of-function mutation in the gpsA gene.	1	-0.143247	0.845398	0.233534	0.746875	-2.32171	0.0014469	-2.02128	0.00098189	-2.83698	7.27043e-05	0.00250425	0.995579	-0.208113	0.587287	-0.871419	0.100654	-0.490704	0.2842	-1.24875	0.0416525	0.665948	0.0450234	0.512485	0.151291
	AT1G01120	Encodes a condensing enzyme KCS1 (3-ketoacyl-CoA synthase 1) which is involved in the critical fatty acid elongation process in wax biosynthesis.	1	-0.448803	0.582656	-0.0264241	0.977402	-3.97422	1.48965e-05	-2.512	0.00239347	-1.82422	0.0297505	0.124324	0.480446	-0.405101	0.0267148	-1.11476	0.0268662	-1.03121	0.0218917	-0.36117	0.483752	1.16248	3.31144e-07	0.511731	0.00498611
	AT4G31780	Encodes an A-type monogalactosyldiacylglycerol (MGDG) synthase. It represents the isoform responsible for the bulk of MGDG synthesis in Arabidopsis.	1	-0.595977	0.135212	0.212333	0.63627	-1.26493	0.000585603	-1.77945	6.43871e-05	-1.66817	0.000181681	1.95173	0.000147329	1.24023	0.0126159	-0.40224	0.241422	-0.557208	0.0762334	-0.380325	0.292146	-0.455232	0.186344	-0.182182	0.632158
	AT5G35360	chloroplastic glutamine synthetase The mRNA is cell-to-cell mobile.	1	-0.786312	0.494132	-0.305889	0.806994	-1.76726	6.38283e-06	-1.61701	0.102988	-1.69271	0.0960782	0.302778	0.579519	0.251939	0.672316	-0.348013	0.25409	0.123198	0.683584	-0.604859	0.0550522	-2.8598	5.07987e-05	-1.71745	0.000988353
	AT3G05020	encodes an acyl carrier protein expressed in leaves, roots, and dry seeds. Protein is not regulated by light.	1	-0.536796	0.146813	0.333625	0.414359	-2.11262	0.035652	-1.62286	0.000402834	-1.71597	0.000294077	-1.00011	0.000678061	-0.754432	0.0100122	0.564255	0.39103	1.16441	0.0168367	-0.0914028	0.902639	-0.0842572	0.756356	-0.164162	0.573468
	AT3G11170	Chloroplastic enzyme responsible for the synthesis of 16:3 and 18:3 fatty acids from galactolipids, sulpholipids and phosphatidylglycerol. Uses ferredoxin as electron donor. Gene expression is induced by wounding in shoot and root. The wound-response in shoot is independent of jasmonic acid mediated pathway whereas the root response is mediated by jasmonic acid. The mRNA is cell-to-cell mobile.	1	0.325594	0.73163	0.544137	0.546715	-1.84413	2.4421e-05	-2.04703	0.0173225	-1.87931	0.0334312	-1.09848	0.00461981	-0.734741	0.0617642	-1.04314	0.0080774	0.79234	0.0245719	0.532663	0.165484	-1.4286	0.000354815	-1.22895	0.00255561
	AT3G55360	Enoyl-CoA reductase is involved in all very long chain fatty acids (VLCFA) elongation reactions that are required for cuticular wax, storage lipid and sphingolipid metabolism. The protein is located in the ER, but in contrast to its yeast homolog TSC13 is not particularly enriched in the nuclear envelope-vacuole junction. Mutants in this gene show abnormal organ morphology and stem glossiness. Ce…	1	-0.77273	0.00826933	0.101278	0.758904	-1.14454	0.000654063	-1.34602	0.000116795	-1.30787	0.000220814	-0.857272	7.5994e-05	-0.617934	0.00279802	-1.4913	0.000237094	-0.118664	0.723447	-0.310906	0.411594	-0.989954	8.24763e-06	-0.367327	0.0541264
	AT4G30950	Chloroplastic enzyme responsible for the synthesis of 16:2 and 18:2 fatty acids from galactolipids, sulpholipids and phosphatidylglycerol. Uses ferredoxin as electron donor. Gene mutation resulted in reduced level of unsaturated fatty acids leading to susceptibility to photoinhibition.	1	-1.16991	0.171975	-0.846118	0.329474	-1.47619	0.000100274	-1.60658	0.099769	-1.3847	0.174793	-1.30519	7.89269e-06	-0.858016	0.00117704	-0.766892	0.0290527	0.184367	0.577593	0.283884	0.439363	-1.21233	1.27282e-05	-0.653863	0.00877576
	AT3G48610	Non-specific phospholipase C6 involved in gametophyte development.	1	-1.63664	0.000173851	-1.89565	3.13504e-05	-1.27772	0.000677814	-1.99406	0.000122062	-1.74935	0.000668083	-0.106668	0.813249	-0.275886	0.550404	-0.540665	0.101423	1.08779	0.00630385	1.35347	0.00284024	-2.76473	0.00572393	0.0691362	0.918281
	AT5G01220	Encodes a UDP-sulfoquinovose:DAG sulfoquinovosyltransferase that is involved in sulfolipid biosynthesis and whose expression is responsive to both phosphate (Pi) and phosphite (Phi) in both roots and shoots.	1	-1.60942	0.000102412	-0.931064	0.0111365	-0.280129	0.227746	-1.64154	0.000150748	-0.897828	0.0287648	-0.155991	0.765592	0.148936	0.800272	-0.392411	0.123569	-0.716988	0.00589503	-0.131171	0.662442	-1.62986	0.00117431	1.27983	0.013333
	AT3G11670	Responsible for the final assembly of galactolipids in photosynthetic membranes. Provides stability to the PS I core complex (e.g. subunits PsaD, PsaE).	1	-1.56733	0.00142719	-2.212	3.10867e-05	-0.368828	0.0615723	-2.10245	0.000155963	-1.4065	0.00855957	-0.388469	0.0955315	-0.575268	0.0223647	0.733733	0.00193909	-0.0249833	0.913218	-0.153608	0.510337	-1.62067	3.64203e-07	-0.314568	0.203604
	AT5G47630	Encodes a member of the mitochondrial acyl carrier protein (ACP) family. Its role is currently obscure as it is weakly expressed and has not yet been identified by mitochondrial proteome analysis.	1	-2.11094	0.000118923	-2.31202	0.000154011	-0.150452	0.773635	-2.11076	3.63621e-05	-1.39727	0.00164281	0.673916	0.0488281	0.433371	0.238237	-0.63725	0.250376	0.850597	0.188544	0.622024	0.435452	0.660236	0.0787345	0.826679	0.0393548
	AT1G31812	Acyl-CoA-binding protein. Bind acyl-CoA esters and protect acyl-CoAs from degradation by microsomal acyl-hydrolases. Plays a role in determining seed oil content.	1	-0.714651	0.0513571	-0.635488	0.0742145	-0.222352	0.361167	-1.5472	0.00021352	-1.14396	0.00463666	-0.00984622	0.975258	-0.0803652	0.806728	-1.83353	5.62577e-06	1.28009	4.03535e-05	0.855239	0.00326724	-0.478989	0.059542	0.0568922	0.85623
	AT3G25860	Encodes the dihydrolipoamide S-acetyltransferase subunit of the plastid Pyruvate Dehydrogenase Complex (E2). Mutant has embryo defect.	1	-1.59506	2.02636e-06	-0.33863	0.182526	-0.831842	0.00038571	-2.07705	1.32793e-06	-1.53324	7.82133e-05	-0.489532	0.0100175	-0.412397	0.0364978	-0.795102	0.00128732	0.881859	0.000412316	0.491789	0.0512524	-0.223062	0.203684	-0.0248092	0.911558
	AT1G52700	alpha/beta-Hydrolases superfamily protein;(source:Araport11)	1	-1.65424	5.45865e-05	-2.11641	1.13416e-05	-1.87544	0.0412325	-0.0148495	0.971562	-1.35508	0.00664114	0.019889	0.984933	0.123886	0.905385	-0.437949	0.587602	1.15956	0.0747112	-0.515359	0.605393	-1.09735	0.0283262	-0.655232	0.161128
	AT2G45150	cytidinediphosphate diacylglycerol synthase 4;(source:Araport11)	1	-1.95917	1.96566e-06	-1.26542	0.000185885	-0.606183	0.124275	-0.80033	0.00379081	-0.747256	0.00780814	-0.579338	0.0149256	-0.466673	0.0594427	-0.39289	0.353708	0.252396	0.593783	1.06326	0.0295448	-0.582141	0.0111136	-0.383636	0.109711
	AT2G29390	Encodes a sterol 4-alpha-methyl-oxidase, specifically a 4-alpha-methyl-delta-7-sterol-4alpha-methyl-oxidase.	1	-1.57238	0.00110588	-1.25842	0.00600766	-0.747768	0.0377894	-0.973954	0.0271257	-0.613263	0.190645	-1.39942	7.00085e-07	-0.743144	0.0012347	-0.02835	0.947438	0.159459	0.633541	0.837611	0.0185438	-0.567578	0.00489008	-0.382696	0.0653352
	AT1G71340	Encodes a member of the glycerophosphodiester phosphodiesterase (GDPD) family.	1	-0.660662	0.0147922	-0.612701	0.0186484	-0.439254	0.216409	-1.17759	0.000723113	-1.30775	0.000328504	-0.122376	0.777168	-0.111511	0.815642	0.634741	0.0625152	-0.0164413	0.958121	-0.041428	0.912594	0.366456	0.333575	-0.127003	0.783205
	AT1G62430	Encodes a CDP-diacylglycerol synthase, involved in phospholipid biosynthesis.	1	-1.30103	0.000744721	-1.26228	0.000819626	-1.04722	0.000199714	-0.723206	0.0131735	-0.61784	0.0386506	-0.22231	0.385466	-0.231839	0.400157	-0.622694	0.0168465	0.360656	0.123398	0.0535283	0.868824	0.228375	0.342283	0.119312	0.66785
	AT3G15690	Single hybrid motif superfamily protein;(source:Araport11)	1	-0.935506	0.000325529	-0.566234	0.01479	-0.899378	0.00207516	-0.922593	0.000301113	-1.25464	1.30953e-05	-0.8099	0.000519836	-0.402358	0.0717802	-1.20102	0.000650903	0.0119735	0.964768	-0.236794	0.382717	0.0411022	0.850488	0.0532694	0.827886
	AT2G34590	Transketolase family protein;(source:Araport11)	1	-1.17893	0.0239557	-0.43423	0.427331	-1.45809	0.000778447	-1.98572	0.000327679	-1.72607	0.00172609	-0.462907	0.00546655	-0.45479	0.00944517	-0.318246	0.399664	-0.586005	0.0494389	-0.689696	0.0446613	-0.179951	0.236782	-0.3783	0.0233885
	AT4G33110	S-adenosyl-L-methionine-dependent methyltransferases superfamily protein;(source:Araport11)	1	-1.76426	0.00125344	-1.04892	0.0385957	-1.58013	5.95416e-05	-1.5871	0.0317985	-1.41244	0.0663606	-0.256962	0.280014	-0.371549	0.139531	0.223894	0.425212	-0.98998	0.00173362	-0.316022	0.315529	-0.603495	0.00977083	-0.389351	0.110341
	AT2G43710	Encodes a stearoyl-ACP desaturase, involved in fatty acid desaturation. The ssi2 mutants have increased 18:0 and reduced 18:1 fatty acids. Exogenous application of glycerol to wild type plants mimics the ssi2 mutant phenotype. The altered 18:1 fatty acid content in the ssi2 mutants has an impact on SA- and JA-mediated defense signaling. ssi2 mutants resulted in hyper-resistance to green peach aph…	1	-0.787006	0.573207	-0.834565	0.533059	-0.80804	0.00119138	-1.52183	0.315547	-0.989973	0.561193	-0.448241	0.0129837	-0.390225	0.038377	0.201661	0.444419	0.0567108	0.826341	0.284798	0.279667	-0.826938	4.99635e-05	-0.569632	0.00345251
	AT1G77590	Encodes major plastidic long chain acyl-CoA synthetase with a slight substrate preference of oleic acid over any of the other fatty acids.	1	-1.4297	1.43705e-05	-0.802719	0.00356428	-0.515127	0.133492	-1.86589	3.59608e-06	-1.9664	2.65654e-06	-0.609455	0.000637661	-0.246121	0.153597	-0.129023	0.755068	0.0802496	0.839657	-0.130477	0.782038	-0.459168	0.00491579	-0.445984	0.00993642
	AT2G40690	Encodes a putative dihydroxyacetone phosphate (DHAP) reductase involved in glycerol-3-phosphate supply within the chloroplast for synthesis of glycerolipids. Mutants have reduced levels of hexadecatrienoic acid, which is rescued by exogenous glycerol-3-phosphate. This gene appears to be involved in the flux of fatty acids in the prokaryotic glyerolipid biosynthesis pathway.	1	-1.3455	3.62273e-05	-1.26571	6.21485e-05	-0.731317	0.167261	-1.75007	1.87912e-06	-1.70894	3.27484e-06	-0.290463	0.297039	-0.0610657	0.856749	0.175086	0.753113	-0.17588	0.755046	-0.00474737	0.994825	-1.22882	2.7654e-05	-0.471547	0.0674717
	AT4G15130	phosphorylcholine cytidylyltransferase2;(source:Araport11)	8	0.139878	0.800412	0.11185	0.835008	-0.205177	0.431936	-0.0370448	0.922878	0.63807	0.122438	-0.196787	0.19331	0.0702837	0.694307	-0.119002	0.697408	1.88074	1.04627e-06	0.347584	0.280127	0.162707	0.25993	0.0805866	0.628737
	AT4G04870	Encodes a protein with cardiolipin synthase activity that is localized to the mitochondiria.	8	0.0896493	0.637881	0.465842	0.0123962	0.0267094	0.964191	-0.284423	0.144431	-0.283454	0.161771	0.785015	0.00331217	0.221196	0.429901	-0.081111	0.905922	1.4622	0.0610795	0.978204	0.297971	-0.728606	0.00428809	-0.385124	0.137934
	AT3G05510	Phospholipid/glycerol acyltransferase family protein;(source:Araport11)	8	0.240896	0.247138	-0.0144967	0.948491	0.965577	0.01372	0.0617995	0.734986	0.0146128	0.941744	-0.434957	0.0569307	-0.278236	0.24987	1.21946	0.00496912	1.38639	3.53524e-05	0.72837	0.0214932	-0.682912	0.00213332	-0.239188	0.283481
	AT1G10030	ergosterol biosynthesis protein;(source:Araport11)	8	0.439586	0.244729	0.119534	0.770674	-0.745119	0.387972	-0.605908	0.104089	-0.914789	0.018803	-0.0856186	0.833867	-0.358593	0.37956	0.416073	0.617112	2.69536	0.00949495	2.65887	0.0213746	0.328359	0.399257	-0.141623	0.764603
	AT4G16700	Encodes a mitochondrial phosphatidylserine decarboxylase. Expressed mainly in roots and flowers.	8	-1.58897	0.0300398	0.267886	0.643551	1.45452	0.0357582	-0.959634	0.0547386	-0.0501007	0.93266	-0.0660561	0.891727	-0.236096	0.633071	0.729	0.372288	3.7536	0.0154405	2.38685	0.189733	1.09565	0.218798	-1.10759	0.390096
	AT3G14360	alpha/beta-Hydrolases superfamily protein;(source:Araport11)	8	-1.58923	0.246904	0.399974	0.693426	0.0733992	0.955141	1.89599	0.133591	0.660342	0.664539	-3.31838	0.000544173	-0.640893	0.189827	-1.13613	0.461824	1.11638	0.278676	0.504208	0.725442	-1.01543	0.0449954	-1.01721	0.0571427
	AT2G44300	Bifunctional inhibitor/lipid-transfer protein/seed storage 2S albumin superfamily protein;(source:Araport11)	8	-0.521325	0.439784	0.34173	0.593801	-0.620608	0.603886	-0.369537	0.494816	-0.596505	0.273274	-2.07469	0.000759697	-1.67521	0.00279682	-2.91437	0.110683	2.70097	0.167265	3.14637	0.151279	-1.18119	0.0025365	-0.421249	0.278068
	AT2G11810	MGD3 is the major enzyme for galactolipid metabolism during phosphate starvation. Does not contribute to galactolipid synthesis under P1-sufficient conditions.	8	-1.31645	0.0160502	-3.75901	0.000517591	-1.74473	0.20254	-0.455028	0.371553	0.630238	0.144804	-0.376089	0.416343	-0.591716	0.222607	-2.62837	0.114431	4.29938	0.0622539	3.40907	0.209065	-4.04322	2.48906e-08	0.0730915	0.887201
	AT3G18000	Encodes a N-methyltransferase-like protein. Double mutants of NMT1 and NMT3 are defective in leaf, root, flower, seed, and pollen development.	8	-2.10354	0.000283932	-3.32539	2.66999e-06	-2.37101	1.52449e-05	-2.20447	7.61623e-05	-2.27229	7.00476e-05	0.965625	0.0861011	0.52454	0.397032	-1.14766	0.00339483	1.74829	0.00291057	1.14322	0.0755385	-3.59027	1.18109e-06	-3.67976	1.71424e-06
	AT3G18850	lysophosphatidyl acyltransferase 5;(source:Araport11)	2	-4.9896	0.000794584	-1.70333	0.0155057	-2.30304	0.0100095	-5.2028	6.67777e-06	-5.91476	9.54064e-06	-0.906842	0.000353564	-0.606872	0.0125172	-1.30453	0.0666654	0.964331	0.583441	2.04322	0.258637	-1.21566	8.45221e-06	-0.62605	0.00835962
	AT5G05580	Encodes a temperature sensitive plastidic fatty acid desaturase.	2	-1.6454	2.44179e-05	-1.17121	0.000705772	-3.33127	1.30033e-05	-3.70446	1.53024e-06	-2.74178	8.82177e-05	-3.528	0.00058418	-1.29009	0.0272145	-0.653392	0.126145	2.31774	0.0133427	1.74774	0.0965233	-2.62515	2.60224e-06	-1.13084	0.0161078
	AT1G27480	alpha/beta-Hydrolases superfamily protein;(source:Araport11)	2	-3.88695	8.06577e-06	-3.0922	7.90033e-05	-1.97127	8.29006e-07	-4.1418	1.24701e-05	-3.82545	3.72522e-05	-2.4488	8.58153e-08	-2.17577	9.98793e-07	-1.63578	1.33704e-05	0.0298262	0.931523	0.0317991	0.942426	-0.646984	0.0226153	-0.331655	0.275912
	AT4G00400	bifunctional sn-glycerol-3-phosphate 2-O-acyltransferase/phosphatase. Involved in cutin assembly and is functionally redundant with GPAT4.	2	-1.35283	0.325283	-1.64135	0.201271	-3.30694	3.07679e-06	-5.55859	0.000285531	-4.79269	0.00119296	-2.61449	4.51257e-09	-2.07969	1.51538e-07	-1.01208	0.00884649	-0.226259	0.548524	-0.578696	0.182217	-1.04839	6.89596e-05	-0.902968	0.000643669
	AT1G04220	Encodes KCS2, a member of the 3-ketoacyl-CoA synthase family involved in the biosynthesis of VLCFA (very long chain fatty acids).	2	0.765185	0.564912	1.03365	0.422427	-2.85916	0.0743661	-2.14779	0.0700906	-2.59762	0.0333303	-1.73752	0.0124403	-1.31314	0.0396108	-0.68963	0.525215	-1.60148	0.0478882	0.158749	0.864296	-4.20335	1.09703e-05	-1.64298	0.00130742
	AT3G12120	Major enzyme responsible for the synthesis of 18:2 fatty acids in the endoplasmic reticulum. Contains His-rich motifs, which contribute to the interaction with the electron donor cytochrome b5. Mutations in this gene suppress the low temperature-induced phenotype of Arabidopsis tocopherol-deficient mutant vte2.	2	-1.11927	0.515406	-0.738742	0.677853	-2.63302	2.8374e-08	-1.70777	0.263294	-1.8866	0.225987	-2.26993	0.091756	-0.891044	0.527003	-1.82808	6.14001e-06	0.410485	0.12277	0.316836	0.292446	-4.5449	0.000191155	-0.617283	0.182949
	AT3G25110	Encodes a FatA acyl-ACP thioesterase	2	-2.60086	0.0367662	-0.195041	0.838707	-1.72155	0.0203251	-1.68419	0.0542917	-1.75909	0.047842	-0.370182	0.375607	0.0730583	0.879068	-2.07807	0.0192746	-1.12772	0.371456	-3.22929	0.0961994	-1.37738	0.000347567	-0.464474	0.160655
	AT4G10955	alpha/beta-Hydrolases superfamily protein;(source:Araport11)	2	-1.42618	0.00135066	0.29269	0.358032	-1.70486	0.0822499	-1.2926	0.000113188	-2.80775	6.1562e-07	-0.588758	0.13726	-0.346231	0.415327	-5.1	0.0137038	-1.2364	0.586166	-1.00089	0.707902	-1.93264	0.00235174	-0.846748	0.0877784
	AT2G06925	Encodes a secretory phospholipase A2 enzyme, which specifically hydrolyzes the sn-2 position of phospholipids. The enzyme has a preference towards linoleoyl acyl chain over palmitoyl acyl chain. It also has a slight preference for phosphatidylcholine over phosphatidylethanolamine.	2	-3.1422	8.04818e-06	-1.8149	0.00166044	-1.44147	0.00109104	-1.48499	0.000124487	-0.541371	0.0860162	-1.58907	0.221159	-2.42286	0.112762	-1.34326	0.00319824	1.83143	0.000697993	0.50928	0.413338	-1.48136	0.00118608	0.336018	0.42462
	AT2G42690	alpha/beta-Hydrolases superfamily protein;(source:Araport11)	2	-3.65021	5.30202e-05	-4.12604	1.30074e-05	-0.319553	0.290785	-3.0527	0.00663582	-1.92785	0.102964	-2.09566	8.7749e-07	-2.11461	2.14353e-06	0.191452	0.594082	-0.996669	0.00256338	-0.12356	0.749018	-2.19189	1.05521e-07	-1.14742	0.000611204
	AT3G23410	Encodes a fatty alcohol oxidase.	2	-1.81973	0.003366	-2.20453	0.000705604	-0.705469	0.0459839	-1.82265	0.000991126	-1.45005	0.00709526	-3.55676	0.000554101	-1.38435	0.0125756	-0.383726	0.316555	-0.0265726	0.951393	-0.6968	0.122677	0.65298	0.162776	-0.265682	0.664105
	AT1G64720	membrane related protein CP5	2	-1.46624	0.317111	-1.56677	0.265161	-2.23187	9.8469e-06	-2.1592	0.0910732	-1.9504	0.142872	-2.10134	5.66696e-07	-1.48213	7.94121e-05	0.354523	0.440812	-2.73528	1.41012e-06	-1.3253	0.00509587	-0.654257	0.025116	-0.663829	0.034482
	AT2G38540	Non-specific lipid transfer protein. Binds calmodulin in a Ca2+-independent manner. Localized to the cell wall. Specifically expressed in L1 epidermal layer. Predicted to be a member of PR-14 pathogenesis-related protein family with the following members: At2g38540/LTP1, At2g38530/LTP2, At5g59320/LTP3, At5g59310/LTP4, At3g51600/LTP5, At3g08770/LTP6, At2g15050/LTP7, At2g18370/LTP8, At2g15325/LTP9,…	2	-1.65506	0.140743	-1.22676	0.282533	-3.06032	3.76106e-06	-2.93482	0.0111228	-3.20721	0.0065701	-3.77644	2.18418e-06	-3.17745	5.18346e-06	-1.20182	0.0262071	-1.16034	0.0189163	-1.16347	0.0319858	-0.247074	0.50924	-0.700665	0.0755048
	AT1G51440	Encodes a lipase that hydrolyzes phosphatidylcholine, glycolipids as well as triacylglycerols.	2	-3.37148	0.000593059	-2.52967	0.0044384	-1.90261	0.0260032	-3.31791	0.00097638	-2.41243	0.0107419	-0.493883	0.0430462	-0.778124	0.00408431	0.5778	0.320661	-1.13338	0.0163631	0.0898258	0.87132	-0.343554	0.136951	-0.641633	0.0126436
	AT2G03550	alpha/beta-Hydrolases superfamily protein;(source:Araport11)	2	-2.1929	0.00319947	-2.09771	0.00402476	-1.21132	1.99618e-05	-4.74266	1.1339e-06	-3.29837	0.000113268	0.169604	0.378367	-0.163413	0.433788	-0.0467903	0.867961	-1.1432	3.25285e-05	-0.647158	0.0100944	-0.75172	0.000262439	-0.23593	0.231215
	AT4G38690	PLC-like phosphodiesterases superfamily protein;(source:Araport11)	2	-2.12171	9.3046e-05	-2.50582	1.37164e-05	-2.47051	0.000272959	-3.6199	7.59554e-07	-3.16669	4.79159e-06	-1.06095	0.00358027	-0.826008	0.023485	-0.0171259	0.971124	-1.34502	0.000566555	-0.591797	0.106965	-2.28869	3.83543e-07	-1.03486	0.00375947
	AT1G30520	Encodes a chloroplast O-succinylbenzoyl-CoA ligase. Involved in phylloquinone biosynthesis. Knock mutant is seedling lethal.	2	-3.1337	1.96088e-05	-3.01862	2.77811e-05	-4.03636	1.76886e-05	-3.77352	1.26566e-05	-3.514	3.62226e-05	-0.307199	0.245791	-0.337076	0.228505	-1.11206	0.00429187	-0.626052	0.0678951	-0.214304	0.60218	-2.28418	2.60875e-09	-1.31429	1.32832e-05
	AT1G49430	Encodes a long chain acyl-CoA synthetase that catalyzes the synthesis of omega-hydroxy fatty acyl-CoA intermediates in the pathway to cutin synthesis. Required for repression of lateral root formation.	2	-1.88627	0.00119032	-1.57866	0.00475027	-4.03668	0.00404822	-2.69667	2.83111e-05	-2.23223	0.000316464	-2.23109	5.69773e-07	-1.24238	0.000435336	-0.43859	0.49111	-0.100391	0.862784	-0.436615	0.49983	-0.836662	0.00463949	-0.590061	0.0529863
	AT1G32200	Encodes a chloroplast glycerol-3-phosphate acyltransferase.Involved in the biosynthesis of chloroplast phosphatidylglycerol.	2	-2.4494	6.38144e-05	-1.62926	0.0031697	-2.18517	1.14784e-05	-2.14631	0.00026765	-2.04066	0.000593388	-0.822386	0.000349708	-0.819142	0.000668558	-0.619625	0.0779352	0.256309	0.44498	0.250178	0.522261	-0.336429	0.0857926	-0.262875	0.21719
	AT4G25050	encodes an acyl carrier protein predominantly expressed in leaves. Gene expression is upregulated by light.	2	-1.606	0.00437077	-1.97523	0.00058479	-2.40027	8.20809e-06	-2.56786	0.000164117	-2.1468	0.00136801	-1.07859	1.06071e-05	-1.22961	6.37241e-06	-0.209626	0.65837	0.716458	0.0694708	0.807342	0.0683092	-0.843842	0.000115715	-0.591404	0.0053637
	AT2G05990	Encodes enoyl-ACP reductase a component of the fatty acid synthase complex. A reduced function mutation in this gene, mod1, was found in a screen for premature cell death mutants. Mutant plants have reduced lipid level and pleiotropic morphological defects, including chlorotic and abnormally shaped leaves. The mRNA is cell-to-cell mobile.	2	-1.31902	9.08099e-05	-0.178833	0.571094	-2.683	1.25165e-05	-2.00215	5.09684e-06	-1.98713	8.09805e-06	-0.068588	0.756751	0.166352	0.458558	-1.17252	0.00375473	0.0636867	0.868432	-0.388064	0.354078	-0.00280551	0.989376	-0.104866	0.637958
	AT3G56130	biotin/lipoyl attachment domain-containing protein;(source:Araport11)	2	-1.18968	0.00476526	-0.516037	0.209676	-2.81185	7.95081e-05	-2.73334	2.54355e-06	-2.86871	1.88409e-06	-0.608483	0.0529838	-0.107736	0.775864	-0.0994504	0.814312	0.733922	0.0128717	0.447724	0.173792	-0.0319996	0.922861	-0.0790775	0.827886
	AT2G22230	Thioesterase superfamily protein;(source:Araport11)	2	-1.61217	3.70884e-05	-0.688094	0.0302232	-1.78881	9.16267e-05	-2.09716	3.34946e-06	-1.97018	9.00836e-06	-0.612616	0.00896587	-0.168594	0.507811	-1.79972	0.000248719	0.406366	0.450764	0.255183	0.709198	-0.300136	0.163519	-0.231265	0.328948
	AT4G20870	encodes a fatty acid hydroxylase, required for the AtBI-1-mediated suppression of programmed cell death.	2	-1.85067	4.18872e-07	-1.57939	2.22394e-06	-1.86346	0.00502899	-2.70299	2.91613e-08	-2.31275	2.44319e-07	-0.0503535	0.825545	0.345024	0.117767	-1.30096	0.0301193	0.399647	0.446782	-0.0535415	0.946783	-0.751029	0.000633746	-0.215261	0.320923
	AT2G26640	Encodes KCS11, a member of the 3-ketoacyl-CoA synthase family involved in the biosynthesis of VLCFA (very long chain fatty acids).	2	-1.88597	0.000230653	-1.97019	0.000139547	-2.69891	7.47188e-06	-2.12152	2.26339e-05	-1.90602	9.56153e-05	-0.0627182	0.774889	-0.47193	0.0274515	-0.809118	0.017714	0.593454	0.0362328	-0.512141	0.143432	0.917492	4.42641e-05	1.36525	5.86343e-07
	AT4G14440	encodes a cytosolic delta3, delta2-enoyl CoA isomerase, involved in unsaturated fatty acid degradation	2	-1.53544	0.00198798	-1.35192	0.00486723	-2.33008	0.000810639	-3.12074	3.95225e-06	-1.76827	0.00301459	-0.166811	0.554685	-0.0209321	0.953343	-0.377507	0.475671	-1.2603	0.0117099	-1.28319	0.0268544	0.611673	0.0196806	-0.23829	0.403091
	AT1G01610	bifunctional sn-glycerol-3-phosphate 2-O-acyltransferase/phosphatase. Involved in cutin assembly and is functionally redundant with GPAT8.	2	-1.12242	0.00237599	-0.77384	0.0260921	-2.23347	0.000111874	-2.19963	9.58029e-07	-1.2369	0.00107405	-0.948296	0.00366453	-0.964382	0.00462043	-0.190919	0.676972	-0.192641	0.616577	-0.970307	0.0270746	-0.567153	0.0351791	0.249928	0.396726
	AT3G16175	Thioesterase superfamily protein;(source:Araport11)	2	-1.82174	0.000998368	-1.76528	0.00245983	-2.85125	0.0324892	-2.33182	2.42879e-05	-1.48285	0.000638166	-1.11754	0.00144472	-0.658338	0.0460956	0.857296	0.267845	-0.502636	0.411105	-0.280492	0.716071	0.195382	0.512998	0.0217765	0.954124
Cell wall metabolism	AT1G30620	encodes a type-II membrane protein that catalyzes 4-epimerization of UDP-D-Xylose to UDP-L-Arabinose in vitro, the nucleotide sugar used by glycosyltransferases in the arabinosylation of cell wall polysaccharides and wall-resident proteoglycans.	4	3.65288	3.0696e-07	3.39435	1.64348e-07	1.82856	8.20581e-05	4.4735	3.74527e-08	4.22261	6.96948e-08	0.676416	0.00219547	0.323035	0.142857	-0.440371	0.400308	0.945369	0.0504357	0.102554	0.887658	1.32491	1.00242e-06	1.13821	1.43332e-05
	AT5G20950	Encodes a beta-glucosidase involved in xyloglucan metabolism.	4	3.05018	5.3009e-06	2.92945	7.548e-06	1.12717	0.00646432	3.92988	9.22549e-08	3.77455	1.99835e-07	0.0135325	0.937446	0.0088191	0.964604	0.125494	0.802931	0.511652	0.195365	0.00736834	0.989353	1.99295	1.30268e-11	1.56393	1.24808e-09
	AT3G02230	RGP1 is a UDP-arabinose mutase that catalyzes the interconversion between the pyranose and furanose forms of UDP-L-arabinose. It appears to be required for proper cell wall formation. rgp1/rgp2 (at5g15650) double mutants have a male gametophyte lethal phenotype. RGP1 fusion proteins can be found in the cytosol and peripherally associated with the Golgi apparatus. The mRNA is cell-to-cell mobile.	4	4.10277	1.42798e-08	4.27867	5.06961e-09	1.62887	8.77789e-05	2.18973	0.000100849	1.58935	0.00123943	1.30665	9.68112e-07	0.61138	0.00423208	1.11279	0.00586524	0.939626	0.0892045	0.682601	0.3042	1.27172	5.73483e-07	1.02736	1.85236e-05
	AT4G10960	Encodes a protein with UDP-D-glucose 4-epimerase activity.	4	2.39296	2.15392e-07	2.87719	3.88061e-08	3.36052	0.0020249	4.05188	2.44656e-08	3.73588	4.93992e-08	1.12839	0.000265634	-0.78912	0.0125661	1.77993	0.124997	-0.00415169	0.995592	-0.184117	0.849784	0.0427757	0.881774	0.0338384	0.919018
	AT4G24000	encodes a protein similar to cellulose synthase	4	5.11928	0.0811386	5.28468	0.0729341	5.85365	0.10086	3.45694	0.00881337	1.99668	0.111898	-1.29156	5.17814e-05	-0.25109	0.386681	-1.64448	0.825724	-1.48045	0.528086	-0.763012	0.782801	0.508493	0.0448039	-0.0193751	0.952674
	AT2G28110	Homolog to AT5G22940, a member of glycosyltransferase family 47 that is involved in secondary cell wall biosynthesis. It exhibits high sequence similarity to tobacco (Nicotiana plumbaginifolia) pectin glucuronyltransferase. Protein has a domain that shares significant similarity with the pfam03016 domain. It is expressed specifically in developing vessels and fiber cells, and FRA8 is targeted to …	4	4.10711	1.66465e-06	3.18347	8.55853e-07	4.15657	0.0419147	5.5503	5.13595e-07	4.68538	7.70727e-07	0.746075	0.0435315	0.767316	0.0495828	2.1971	0.381646	-4.5719	0.000268711	-0.608842	0.245294	3.65865	1.0802e-08	3.68682	2.04242e-08
	AT4G25810	xyloglucan endotransglycosylase-related protein (XTR6)	4	4.79564	0.00298683	3.80542	0.00171222	3.03462	0.513846	4.36363	0.000499112	3.17748	0.00150002	0.936407	0.0767955	-0.139073	0.833949	1.60054	0.794496	2.70071	0.257847	2.981	0.275388	2.54459	0.00789821	4.66248	4.469e-05
	AT5G06860	Encodes a polygalacturonase inhibiting protein involved in defense response. PGIPs inhibit the function of cell wall pectin degrading enzymes such as those produced by fungal pathogens. PGIP1 is induced by fungal infection. Suppressed in the proton sensitive stop1-mutant, but the transcription level was recovered by transformation of STOP2. Knockout mutant showed severe damage in the root tip in …	4	3.68137	9.83724e-07	4.14403	3.11568e-07	2.0792	0.000155711	3.83544	8.31468e-08	3.12212	3.33171e-07	1.50898	7.8518e-08	1.24702	2.28787e-06	1.29674	0.0161782	0.020161	0.959714	0.787424	0.0381857	3.958	1.28563e-12	3.72497	1.24539e-11
	AT4G02330	Encodes a pectin methylesterase that is sensitive to chilling stress and brassinosteroid regulation.	4	2.97326	0.000266467	4.61653	6.20947e-05	4.13643	5.41064e-06	6.26297	3.22608e-05	6.01849	4.85878e-05	1.26559	3.97471e-05	1.22695	0.000120888	2.21672	0.00526502	1.91844	0.00055736	1.51147	0.00936348	3.09421	6.52348e-11	3.56536	3.21564e-11
	AT2G18660	Encodes PNP-A (Plant Natriuretic Peptide A). PNPs are a class of systemically mobile molecules distantly related to expansins; their biological role has remained elusive. PNP-A contains a signal peptide domain and is secreted into the extracellular space. Co-expression analyses using microarray data suggest that PNP-A may function as a component of plant defence response and SAR in particular, an…	8	-0.719578	0.642193	-0.544254	0.732391	6.48914	6.32588e-07	2.77072	0.000316876	3.93147	4.6897e-05	2.93532	9.38241e-06	1.77288	0.00263629	1.78999	0.0744742	0.119372	0.916742	0.187839	0.891125	1.82845	0.0141626	2.04385	0.0102653
	AT3G51160	Catalyzes the first step in the de novo synthesis of GDP-L-fucose. Loss of function mutations result in reduced levels of fucosylation and decreased freezing tolerance.	2	2.82339	1.47107e-07	2.76849	7.42129e-08	1.40258	7.11362e-06	1.46269	0.000190449	1.39113	0.000385041	0.283142	0.175828	-0.250247	0.268827	0.0450333	0.885024	1.26805	0.000110616	0.403997	0.213196	1.28521	1.42995e-06	0.606438	0.0065231
	AT4G06744	Leucine-rich repeat (LRR) family protein;(source:Araport11)	2	2.69453	2.19041e-05	3.14336	5.0333e-06	0.861319	0.304235	1.99163	0.000606884	1.02673	0.0225116	-0.555562	0.0957542	0.314816	0.341208	-0.625241	0.617471	0.179718	0.817701	0.382795	0.665992	0.181348	0.598267	0.788774	0.0206278
	AT1G17890	NAD(P)-binding Rossmann-fold superfamily protein;(source:Araport11)	2	1.9753	2.75992e-06	1.83013	2.28677e-06	1.27603	0.00153675	1.98329	5.80375e-06	1.64299	3.51303e-05	-0.288894	0.238225	-0.149004	0.595589	-0.121892	0.812289	0.798215	0.121467	0.941028	0.110308	0.0820118	0.739133	-0.147431	0.578173
	AT3G29360	Encodes one of four UDP-glucose dehydrogenase UGD) genes. Mutation of this gene in combination with UGD3 leads to swollen plant cell walls and severe developmental defects associated with changes in pectic polysaccharides.	2	1.93208	0.000392324	2.08773	0.000157318	0.360369	0.0492446	1.0172	0.0367281	0.657288	0.166741	1.65802	3.30044e-06	0.743251	0.011359	-0.429365	0.0330893	1.2461	3.48277e-06	0.152694	0.507837	0.307955	0.224094	-0.0455511	0.88621
	AT4G09030	Encodes arabinogalactan protein (AGP10). The mRNA is cell-to-cell mobile.	2	0.93507	0.274187	1.95585	0.0261409	1.18471	0.019591	1.77439	0.0435798	0.246965	0.790216	0.892884	0.311995	0.0371913	0.976635	-1.12162	0.158399	0.33275	0.645551	1.0007	0.17812	-0.600807	0.703121	-0.0930221	0.957904
	AT5G16510	RGP5 is a member of the reversably-glycosylated family of proteins. Analyses using tagged RGP5 suggest that it is present in the cytosol and in association with the Golgi apparatus. Recombinant RGP5 does not have UDP-arabinose mutase activity based on an in vitro assay even though the related RGP1, RGP2, and RGP3 proteins do have activity in the same assay. RGP5 can form complexes with RGP1 and R…	2	1.21932	7.48991e-06	1.21692	3.64426e-06	1.10786	0.000445548	1.86013	2.55296e-08	1.73988	6.58464e-08	-0.0266639	0.933957	-0.186792	0.553684	-0.149729	0.685772	-0.349955	0.303921	-0.666033	0.113157	1.36143	4.0647e-05	0.777646	0.0119602
	AT5G18070	encodes a novel protein involved in DNA repair from UV damage. Isolated by functional complementation of E. coli UV-sensitive mutants (UVR genes).	2	1.12536	0.000840321	1.0195	0.0013706	0.543993	0.121848	1.45115	6.12871e-05	0.871741	0.00483441	-0.559497	0.0023403	-0.280658	0.12669	-0.365415	0.415251	-0.592199	0.171671	-0.848403	0.119021	0.623703	0.00063071	0.486166	0.008203
	AT4G28300	Encodes a protein with 13.6% proline amino acids that is predicted to localize to the cell wall. The mRNA is cell-to-cell mobile.	2	0.682445	0.535071	0.563417	0.594101	1.29138	7.06451e-05	1.21868	0.164845	1.05835	0.236269	-0.206137	0.364482	-0.0259986	0.929215	1.53755	4.1602e-05	-0.324751	0.232569	0.117877	0.732566	0.674141	0.00294068	0.132134	0.586375
	AT2G28760	UDP-XYL synthase 6;(source:Araport11)	2	-0.582692	0.139562	-0.362079	0.366788	1.44551	0.00210608	2.43886	0.000893722	1.70417	0.0052642	-0.402781	0.0592597	-0.179247	0.449996	-1.29518	0.0570468	-0.109517	0.88643	0.314579	0.704682	1.242	2.68416e-06	0.816211	0.000638695
	AT1G02460	Pectin lyase-like superfamily protein;(source:Araport11)	2	0.321489	0.349898	0.551593	0.096632	2.00052	0.00939148	2.4265	3.25245e-07	2.71527	3.6399e-07	-2.78984	0.000536343	-0.887378	0.0794486	0.603163	0.533173	1.18832	0.0450561	0.570837	0.438722	1.04536	0.018209	0.227487	0.662419
	AT2G46330	Encodes arabinogalactan protein (AGP16).	2	1.14977	0.113599	0.3731	0.568122	0.166546	0.708912	0.545865	0.471614	1.17256	0.163308	-0.214249	0.558018	0.406322	0.281699	0.56891	0.196765	1.1693	0.00947861	1.07928	0.0289693	2.41407	3.29489e-07	2.71878	1.29875e-07
	AT1G19300	The PARVUS/GLZ1 gene encodes a putative family 8 glycosyl transferase that contributes to xylan biosynthesis. Its gene expression shows good co-variance with the IRX3 gene involved in secondary cell wall synthesis. PARVUS/GLZ1 is predicted to have galacturonosyltransferase activity and may be involved in the formation of the complex oligosaccharide sequence present at the reducing end of xylan. P…	2	0.231584	0.600484	-0.484086	0.207876	1.18694	0.000309513	0.424856	0.240421	0.750801	0.0579505	0.403512	0.0677427	0.65732	0.00711682	-0.463978	0.19596	0.295086	0.481595	0.563081	0.225333	2.40459	2.67733e-10	2.49148	4.05958e-10
	AT3G03050	encodes a cellulose synthase like protein. mutations initiate root hairs that rupture at their tip soon after initiation. is required for the synthesis of a noncellulosic wall polysaccharide.	2	0.82472	0.166755	0.860715	0.133872	-0.155508	0.512651	0.458368	0.393907	0.323275	0.569457	0.712724	0.00577081	0.784496	0.00451709	-0.11591	0.674145	-0.0807364	0.740662	0.139138	0.611291	1.50571	1.66837e-06	2.40356	4.72804e-09
	AT3G62830	encodes an isoform of UDP-glucuronic acid decarboxylase, which is predicted to be membrane-bound by PSORT. This enzyme produces UDP-xylose, which is a substrate for many cell wall carbohydrates including hemicellulose and pectin. UDP-xylose is also known to feedback regulate several cell wall biosynthetic enzymes.	2	0.706557	0.0242321	1.10596	0.00135249	1.05898	1.46247e-05	0.972967	0.0050642	0.910896	0.00928312	0.647814	0.0849472	0.54358	0.176519	-0.168909	0.458228	0.389648	0.0418066	0.0443412	0.866746	4.61019	9.67556e-10	3.33471	2.60547e-07
	AT5G15490	Encodes one of four UDP-glucose dehydrogenase UGD) genes. Mutation of this gene in combination with UGD2 leads to swollen plant cell walls and severe developmental defects associated with changes in pectic polysaccharides.	2	2.21878	1.81811e-06	2.55176	3.5178e-07	0.776835	0.00162112	0.599106	0.0720224	0.0265146	0.940771	1.06405	0.000202049	0.610616	0.0233923	-0.854136	0.00374614	1.6598	5.06567e-06	0.738118	0.0203158	2.03008	2.57465e-08	1.40652	8.25991e-06
	AT4G33440	Pectin lyase-like superfamily protein;(source:Araport11)	2	1.14715	0.0244901	1.51144	0.00482325	-0.981136	0.26457	0.11241	0.810654	-0.201246	0.669905	0.513173	0.0653523	-0.194944	0.537499	-1.35154	0.202276	2.12846	0.0681612	0.842539	0.588131	2.7627	2.75254e-09	1.72007	5.09536e-06
	AT1G55850	encodes a protein similar to cellulose synthase The mRNA is cell-to-cell mobile.	2	-0.72604	0.118519	-1.09944	0.0133624	0.476007	0.224053	0.398088	0.194117	0.542191	0.102138	1.06029	0.332379	0.942692	0.428641	0.535934	0.210566	-1.14768	0.00288537	-0.861437	0.0338375	1.08577	0.00470679	2.15943	9.07079e-06
	AT5G10560	Glycosyl hydrolase family protein;(source:Araport11)	2	-1.25152	0.0179756	-1.29439	0.012655	0.128546	0.581876	-0.44175	0.399178	0.172757	0.785747	0.152888	0.389377	0.557886	0.00415047	0.403105	0.094821	0.470301	0.0373485	0.109668	0.693624	1.68865	1.86222e-09	1.03135	4.45951e-06
	AT4G36890	IRX14 was identified as MUCI64 in a reverse genetic screen for MUCILAGE-RELATED genes. IRX14/MUCI64 is a GT43 protein essential for xylan elongation in seed coat mucilage. The xylan backbone maintains the attachment of mucilage to the seed surface and the distribution of cellulose. It was identified based on its gene expression co-variance with the IRX3 gene involved in secondary cell wall synthe…	2	-0.226605	0.497202	-0.322974	0.292227	0.089104	0.676088	-0.0458024	0.902444	0.111586	0.777661	-0.200816	0.280195	-0.156314	0.444938	0.394877	0.0642382	-0.33323	0.0880355	-0.311727	0.164486	1.28553	2.71472e-07	0.530343	0.00713317
	AT4G17030	Encodes EXLB1 (expansin-like B1), a member of the expansin family.	2	-0.810901	0.044585	-1.91703	0.000121323	0.936782	0.1374	-0.25915	0.525971	0.587078	0.223515	0.940466	0.0414728	0.810383	0.0960838	-1.37641	0.168294	0.32388	0.648852	1.1441	0.113563	3.39073	5.85206e-06	1.68363	0.0122055
	AT5G23870	Encodes a pectin acetylesterase that removes cell wall acetate associated with pectin formation in Arabidopsis leaves.	2	-1.65757	0.000565012	-2.01918	5.51227e-05	-2.08886	0.00652119	-0.318556	0.290279	-0.701973	0.0208975	0.953277	0.00268033	1.10216	0.00136008	1.15203	0.0163096	1.25777	0.000510744	1.08961	0.00402535	2.12724	4.57468e-07	1.21785	0.000747835
	AT3G23730	xyloglucan endotransglucosylase/hydrolase 16;(source:Araport11)	2	-1.54087	0.00902145	-0.888491	0.102367	-2.59822	0.0973063	1.74757	0.00168752	1.6292	0.00336209	0.133722	0.762717	0.518922	0.233686	-1.693	0.239529	2.24871	0.155131	2.06766	0.269609	3.14292	4.2008e-08	2.82101	4.04698e-07
	AT3G45970	member of EXPANSIN-LIKE. Naming convention from the Expansin Working Group (Kende et al, 2004. Plant Mol Bio) The mRNA is cell-to-cell mobile.	2	-2.2096	0.232671	-1.69591	0.371856	-3.51404	0.0159318	1.45729	0.200792	0.945025	0.420299	-1.08724	0.0524917	-1.1179	0.0598654	-2.35201	0.050488	-0.180472	0.579578	0.0174268	0.970174	2.59226	0.00099132	2.68958	0.00128908
	AT1G32170	xyloglucan endotransglycosylase-related protein (XTR4) The mRNA is cell-to-cell mobile.	5	1.72564	0.00939043	1.38086	0.0171388	-0.168057	0.854008	3.90947	1.05676e-07	2.78528	4.72252e-07	-0.154816	0.478581	0.138363	0.566018	0.642179	0.408514	0.173558	0.547242	-0.013224	0.975616	-0.388794	0.0544793	0.422623	0.0542667
	AT3G61490	Pectin lyase-like superfamily protein;(source:Araport11)	5	0.358204	0.499941	0.621206	0.222995	-1.27765	0.188791	3.52045	2.55327e-05	2.95274	7.52936e-05	-0.447926	0.261683	0.250484	0.574137	0.184025	0.845633	-0.54014	0.156599	-0.00735943	0.988835	0.756893	0.0440003	0.92043	0.0243054
	AT1G63180	Encodes a protein with UDP-D-glucose 4-epimerase activity. Involved in pollen development.	5	2.07895	0.000395169	2.2866	0.000121377	-0.507819	0.645025	3.58708	4.69594e-07	2.3168	1.97107e-05	-1.54066	1.84102e-05	-0.766945	0.0155577	-0.285284	0.81834	-2.34345	3.29694e-05	-1.04535	0.0134971	0.817398	0.00468481	0.318141	0.287372
	AT5G04310	Pectin lyase-like superfamily protein;(source:Araport11)	5	2.31891	0.00463378	1.60983	0.0160161	-1.17727	0.560299	4.9203	6.26121e-08	4.00728	1.15382e-07	-2.45122	2.14229e-06	-1.10661	0.00825471	-0.149585	0.942669	1.34156	0.0576896	0.727777	0.396764	-1.09761	0.0042854	-0.775178	0.0502621
	AT2G32530	encodes a gene similar to cellulose synthase	3	-0.354254	0.230391	0.558404	0.0858783	2.03517	0.0463126	0.840416	0.03881	0.790905	0.0577152	0.465811	0.330677	0.624956	0.218298	1.79782	0.110113	-1.77942	0.0108964	0.44363	0.479393	-2.5793	7.10658e-06	0.141493	0.797647
	AT4G19420	Pectinacetylesterase family protein;(source:Araport11)	3	-1.76793	0.044336	-3.46076	0.000194127	1.85206	0.0459839	0.315061	0.679822	0.904064	0.281224	-1.4354	0.00253877	-0.686732	0.0892014	3.29353	0.00211029	-2.45766	0.000442421	-0.737239	0.286624	-1.28212	0.000265668	-0.626109	0.0528604
	AT5G49360	Encodes a bifunctional {beta}-D-xylosidase/{alpha}-L-arabinofuranosidase required for pectic arabinan modification. Located in the extracellular matrix. Gene is expressed specifically in tissues undergoing secondary wall thickening. This is a member of glycosyl hydrolase family 3 and has six other closely related members.	3	-1.10469	0.687442	-1.68973	0.490414	0.125	0.887248	0.0350825	0.984502	-0.656871	0.696176	-2.95237	6.20284e-07	-1.38369	0.00340068	1.86293	0.0202013	-3.51996	0.000106044	-0.760807	0.409684	2.32574	5.0538e-06	1.26627	0.00455329
	AT5G64570	Encodes a beta-d-xylosidase that belongs to family 3 of glycoside hydrolases.	3	-0.511226	0.626347	-1.23058	0.168137	-0.0465383	0.957541	2.11535	0.00115054	0.99121	0.042109	-1.82937	1.06494e-07	-1.24907	2.50283e-05	-1.22514	0.206916	-2.68271	0.000246642	-0.746526	0.312276	1.59051	1.26573e-07	0.707216	0.00269128
	AT3G10740	Encodes a bifunctional alpha-l-arabinofuranosidase/beta-d-xylosidase that belongs to family 51 of glycoside hydrolases. It may be involved in cell wall modification.	3	-0.346216	0.567524	-0.872505	0.0990765	-0.929779	0.0345664	0.541535	0.294762	-0.0765993	0.889143	-2.06914	2.68245e-08	-1.09517	0.00010238	0.0618197	0.909585	-1.78942	0.000141412	-0.133814	0.795916	0.762136	0.00111098	0.768475	0.00191131
	AT1G62440	encodes a paralog of LRX1 (LEUCINE-RICH REPEAT/EXTENSIN 1) which acts synergistically with LRX1 in root hair cell morphogenesis.	3	0.151581	0.887867	0.640135	0.501764	-3.26741	0.18651	-2.00106	0.13422	-3.06776	0.0740651	-1.06583	0.0895615	-1.07807	0.0846161	2.12062	0.193372	-1.97572	0.00236725	-1.4569	0.0243148	0.0240955	0.98804	-0.0801392	0.966213
	AT1G23200	ProPME pectin methyl esterase involved in embryo development.	3	0.225277	0.701524	1.20978	0.0471528	0.401445	0.31982	-2.33934	0.000300634	-2.37389	0.000307335	-1.77049	8.6827e-07	-0.855487	0.00316116	-0.824207	0.119142	-1.61948	0.000261894	-0.823801	0.0364172	0.267837	0.284641	0.341141	0.208094
	AT4G23920	Encodes a protein with UDP-D-glucose 4-epimerase activity. Involved in growth and cell wall carbohydrate biosynthesis.	3	-0.824821	0.00351011	0.744123	0.0195731	-0.388518	0.27704	-1.46235	1.84004e-05	-0.965368	0.00171893	-1.97752	6.83743e-06	-1.82058	4.32988e-05	-0.580759	0.141201	-0.481096	0.15271	-0.64141	0.116276	-1.07413	0.00246501	-0.864819	0.0181221
	AT2G20370	Encodes a xyloglucan galactosyltransferase located in the membrane of Golgi stacks that is involved in the biosynthesis of fucose. It is also involved in endomembrane organization. It is suggested that it is a dual-function protein that is responsible for actin organization and the synthesis of cell wall materials. The mRNA is cell-to-cell mobile.	3	0.887931	0.0168836	1.54816	0.000434068	0.469297	0.0487858	-0.0667095	0.876234	0.0745925	0.871106	0.389553	0.0644865	0.0549918	0.834639	-0.165033	0.564749	1.08816	0.0005888	0.0961195	0.805093	1.63523	5.9008e-08	1.00203	7.27616e-05
	AT2G39770	Encodes a GDP-mannose pyrophosphorylase/ mannose-1-pyrophosphatase. This enzyme provides GDP-mannose, which is used for cell wall carbohydrate biosynthesis and protein glycosylation as well as for ascorbate (vitamin C) biosynthesis. Mutations in this gene confer hypersensitivity to NH4+.	3	0.539109	0.142273	0.626112	0.0810211	0.22386	0.319022	-0.559959	0.119078	-0.545586	0.141375	0.0535725	0.784731	0.0103092	0.965027	0.283095	0.247995	1.05192	0.000115088	0.205198	0.431718	0.0320571	0.863632	0.360381	0.0525866
	AT5G52560	Encodes a protein with UTP:sugar 1-phosphate uridylyltransferase activity, which has been shown to use a wide range of substrates including glucose-1-P, galactose-1-P, xylose-1-P, arabinose-1-P and glucuronate-1-P. The enzyme was shown to require Mg2+ or Mn2+ for activity. Mutations in USP can lead to a complete loss of male fertility.	3	0.329356	0.523644	0.341252	0.487598	0.0281242	0.909614	-0.254884	0.609797	-0.431834	0.385553	0.00527646	0.979281	0.123745	0.51159	-0.139832	0.57858	0.643325	0.00376983	0.180309	0.467287	0.928393	5.55462e-06	0.476326	0.00754749
	AT3G25140	Quasimodo1, encodes a glycosyltransferase, involved in homogalacturonan biosynthesis; mutant shows cell adhesion defect and lower wall uronic acid content. The mRNA is cell-to-cell mobile.	3	1.05944	0.0040283	1.07895	0.00273259	-0.617341	0.0029322	-0.00661983	0.983516	-0.304196	0.297901	-0.17803	0.356219	-0.0775379	0.733037	0.0167956	0.94735	1.19023	7.54404e-06	-0.397936	0.0773322	0.131222	0.47417	0.217399	0.265557
	AT2G45790	Encodes a cytoplasmic phosphomannomutase, involved in ascorbate biosynthesis	3	1.38368	0.00214528	1.07868	0.00710518	1.59794	1.31271e-06	0.253669	0.479361	-0.00692547	0.98719	-0.69775	0.000594004	-0.450047	0.0231085	0.135646	0.620111	0.758053	0.00365258	0.576974	0.0396829	-0.196134	0.263669	-0.160848	0.408554
	AT1G17270	O-fucosyltransferase family protein;(source:Araport11)	3	0.437605	0.0190432	0.336162	0.0487896	0.147306	0.727874	0.907941	3.2787e-05	0.507672	0.00408754	-0.143878	0.536345	0.0545157	0.845127	0.0738348	0.885401	0.552747	0.117205	0.480604	0.249648	-1.07473	3.80082e-05	-0.614069	0.00939285
	AT5G22130	member of Glycosyltransferase Family- 50	3	0.101448	0.687777	0.147694	0.528509	-0.539637	0.252622	0.230748	0.337505	-0.0355168	0.893151	0.208223	0.562005	0.635427	0.0744695	-0.258142	0.624686	1.05892	0.0794858	0.0765988	0.938414	-0.400984	0.222619	-0.669427	0.0621521
	AT2G03220	member of Glycosyltransferase Family- 37	3	-0.435247	0.0432813	-0.220915	0.299327	0.195336	0.512755	-0.194684	0.40292	-0.130921	0.609231	0.255978	0.39825	-0.00829054	0.983004	-0.197462	0.575386	1.57309	0.000315063	1.21338	0.00779965	0.0575388	0.853816	-0.278537	0.382433
	AT5G48450	Encodes a protein with two DUF26 domains and a signal peptide for secretion. The protein is transported to the apoplast when it is expressed as a GFP fusion protein.	3	0.286715	0.259467	1.20296	0.000168356	-1.16708	0.101016	-0.696802	0.00731657	-0.494485	0.0478436	1.19344	0.000549844	1.56453	7.65677e-05	-0.539984	0.43455	0.86264	0.278809	0.271677	0.815648	0.481014	0.101077	0.616023	0.0535866
	AT3G28180	encodes a gene similar to cellulose synthase The mRNA is cell-to-cell mobile.	3	0.0766844	0.886646	-0.500164	0.242448	-0.867953	0.0654835	-0.97703	0.0359088	-0.335289	0.526672	0.589919	0.0274243	0.460575	0.101354	-0.919815	0.0754618	1.86746	0.00152069	1.0026	0.0991233	-0.0508066	0.852438	1.5004	8.73366e-06
	AT1G02000	UDP-D-glucuronate 4-epimerase The mRNA is cell-to-cell mobile.	3	0.841469	0.00588604	0.69016	0.0121099	-0.587455	0.0981043	-0.580883	0.031999	-0.615412	0.028104	0.44065	0.352125	-1.11003	0.0778563	-0.0720806	0.866597	-0.342615	0.288467	-0.223312	0.573951	-2.38061	2.28903e-06	-0.700617	0.036167
	AT1G01220	Encodes a bifunctional enzyme that has both L-fucokinase and GDP-L-fucose pyrophosphorylase activities. It catalyzes the two steps of the L-fucose salvage pathway for the generation of activated GDP-L-fucose. This pathway seems to be of minor importance for cell wall polysaccharide biosynthesis compared to the de novo GDP-L-fucose biosynthesis pathway in Arabidopsis.	3	-0.124	0.701168	-0.418919	0.127497	-0.95673	0.00247639	0.17481	0.519543	-0.278781	0.282506	-0.981239	8.97004e-05	-0.469516	0.0394735	-0.699509	0.0276456	-0.708145	0.0134509	-0.60897	0.0554809	-0.82877	0.00032091	-0.460854	0.0378109
	AT4G01220	Encodes MGP4 (MALE GAMETOPHYTE DEFECTIVE 4), a rhamnogalacturonan II xylosyltransferase important for growth of pollen tubes and roots.	3	-0.300483	0.288997	-0.31963	0.236967	-0.797264	0.0777447	-1.06663	0.000827175	-1.04807	0.0012449	-0.233483	0.640693	0.0909194	0.877663	-0.504287	0.282638	0.0775019	0.872506	-0.390138	0.480497	-0.723563	0.112681	-0.947586	0.0566472
	AT3G55140	Pectin lyase-like superfamily protein;(source:Araport11)	3	-1.05266	0.00133325	-0.936651	0.00291648	-0.0479337	0.895004	-1.08161	0.000543149	-0.597733	0.0499505	-0.152852	0.580153	-0.0613188	0.851292	0.457307	0.160602	-0.486939	0.10519	-0.224635	0.531961	-0.520432	0.0444354	-0.291849	0.291757
	AT1G80170	Pectin lyase-like superfamily protein;(source:Araport11)	3	-1.31041	0.000614266	-1.05596	0.00359411	-0.483736	0.619891	-1.37702	0.000296868	-1.29496	0.00053762	-1.08751	0.106026	-0.0352951	0.961999	-0.0376446	0.972402	0.255221	0.761406	-0.272926	0.813692	-0.0860408	0.860751	-0.675585	0.183646
	AT3G10700	Encodes a GHMP kinase family protein that acts as a galacturonic acid-1-phosphate kinase that catalyzes the production of galacturonic acid-1-phosphate. This is a precursor of the important cell wall building block UDP-galacturonic acid. Based on gene trap line GT8007, the gene appears to be expressed in a petal and stamen-specific manner, between flower stages 8 to 11, however, later RT-qPCR ana…	3	-1.34575	0.000459344	-1.69482	4.40914e-05	-1.26655	0.00506082	-0.870003	0.0266393	-1.22431	0.0029306	-1.40639	0.00010979	-1.19611	0.000788544	-0.244933	0.558669	-0.29559	0.460253	0.378117	0.379848	-1.41481	3.37103e-05	-0.792175	0.0108897
	AT2G28100	Encodes a protein with &#945;-fucosidase activity. The activity was assessed on 2'-fucosyl-lactitol. AtFUC1 was not able to act on XXFG substrates, at least when heterologously expressed in <i>Pichia pastoris</i>. The enzyme has been postulated to act on fucosylated substrates other than xyloglucan oligosaccharides. was shown (<i>Pichia pastoris</i>) to hydrolyze fucose in 3- and 4-linkage , henc…	3	-1.23008	9.91963e-05	-1.34486	2.83041e-05	-0.412304	0.245331	-0.257297	0.261149	-0.484908	0.0380055	-1.2392	0.428342	0.0702414	0.96652	0.0327742	0.941134	-0.261482	0.411843	0.288396	0.420579	-2.15744	0.0128757	-0.501115	0.389559
	AT5G09760	Plant invertase/pectin methylesterase inhibitor superfamily;(source:Araport11)	3	-1.12999	0.0112345	-1.27899	0.00359155	-0.327043	0.21762	-0.0940146	0.868754	-0.594873	0.242064	-0.741091	0.0302279	-0.365089	0.317015	-0.421859	0.1497	-0.384592	0.122064	-0.300013	0.302916	-1.93877	3.75807e-06	-1.19724	0.00130589
	AT1G69530	Member of Alpha-Expansin Gene Family. Naming convention from the Expansin Working Group (Kende et al, Plant Mol Bio). Involved in the formation of nematode-induced syncytia in roots of Arabidopsis thaliana.	6	1.14374	0.0743269	-0.375532	0.49613	-2.0267	0.0128807	-0.122759	0.848837	-0.154645	0.817805	-3.08451	0.0653608	-4.39882	0.0173413	0.94767	0.273837	0.698341	0.383436	0.609976	0.507642	-2.28763	0.000154428	-2.72271	5.77979e-05
	AT4G13710	Pectin lyase-like superfamily protein;(source:Araport11)	6	-2.83925	0.000470782	-1.41457	0.015783	-0.456372	0.542765	-2.8836	5.10556e-05	-2.79158	5.93702e-05	-3.32238	1.12774e-06	-2.98667	1.0743e-05	-0.251706	0.76521	2.78214	0.0632946	1.13923	0.579315	-1.59059	0.00182277	-2.08424	0.000276412
	AT5G66460	Encodes a endo-beta-mannanase involved in seed germination and silique dehiscence.	6	-2.21994	0.000183049	-1.36877	0.00623206	-0.930507	0.0398294	-3.51521	4.39714e-06	-3.03455	1.21786e-05	-2.88935	0.00594444	-2.37194	0.0100122	-1.12945	0.0265765	-0.785886	0.0508315	0.21301	0.641776	-1.4224	0.00100043	-1.78638	0.000232235
	AT2G37090	The IRX9 gene encodes a putative family 43 glycosyl transferase. It was coordinately expressed with the cellulose synthase subunits during secondary cell wall formation. Cell wall analysis revealed a decrease in the abundance of xylan in the irx9 mutant, indicating that IRX9 is required for xylan synthesis. Mutants have irregular xylem phenotype suggesting a role in secondary cell wall biosynthes…	6	-4.28629	0.0171857	-1.96052	0.0948024	-1.8651	0.125867	-0.12039	0.861062	-2.09424	0.028523	-2.56733	0.0104435	-1.79696	0.0310954	-3.16567	0.062217	-2.78069	0.138125	0.605901	0.69115	-0.662348	0.236275	-0.971816	0.127299
	AT5G01930	Encodes a endo-beta-mannanase involved in seed germination.	6	-0.562708	0.115522	0.303803	0.384746	-2.1727	0.0146204	1.6536	0.000275671	0.980318	0.017986	-1.64842	0.0047223	-1.45018	0.0118021	-2.84516	0.0117828	-0.0241532	0.977162	1.25904	0.0809606	-0.413212	0.409656	-0.680305	0.209576
	AT5G15630	Encodes a member of the COBRA family, similar to phytochelatin synthetase. Involved in secondary cell wall biosynthesis. Mutants make smaller plants with reduced levels of cellulose and cell wall sugars.	6	-1.69021	0.0474195	-0.116874	0.878177	-3.24843	0.0526126	1.67701	0.0678664	0.556068	0.60291	-1.07414	0.00287184	-2.67945	2.34164e-05	-2.29377	0.127124	-0.227426	0.879852	0.77336	0.603961	-0.484386	0.115906	-0.114324	0.739359
	AT5G44030	Encodes a cellulose synthase involved in secondary cell wall biosynthesis. Confers resistance towards bacterial and fungal pathogens, independent of salicylic acid, ethylene and jasmonate signaling. The mRNA is cell-to-cell mobile.	6	-2.07671	0.00171396	-1.20867	0.039275	-2.34068	0.00699405	-0.0544484	0.927743	-0.534901	0.334049	-0.967745	0.00253297	-1.25852	0.000468375	-2.90178	0.0080669	-0.525866	0.443294	0.379689	0.616006	0.296177	0.286821	0.0415077	0.90608
	AT4G18780	Encodes a member of the cellulose synthase family involved in secondary cell wall biosynthesis. Mutants have abnormal xylem formation, reduced cellulose content, and enhanced drought and osmotic stress tolerance. Mediates resistance towards bacterial pathogens via ABA. Confers resistance towards bacterial and fungal pathogens, independent of salicylic acid, ethylene and jasmonate signaling.	6	-2.3853	0.0150472	-0.958206	0.201507	-2.21752	0.00172964	0.132844	0.858003	-1.05286	0.185547	-0.460114	0.248183	-0.589896	0.161862	-3.83812	0.00137129	-0.287453	0.638169	0.557986	0.369675	-0.670268	0.0742417	-1.09092	0.0104856
	AT1G09890	Rhamnogalacturonate lyase family protein;(source:Araport11)	6	-2.29948	0.136889	-2.39201	0.182658	-2.96154	0.0819757	1.99363	0.124794	-0.0386685	0.984423	-2.82239	0.000685501	-1.76126	0.00623811	-0.266192	0.854468	1.21459	0.511571	2.76465	0.136643	-0.160619	0.716423	0.155577	0.738984
	AT3G02570	Encodes a protein with phosphomannose isomerase activity.	6	-1.44196	0.00191961	-1.61181	0.000571085	-1.03363	0.00222741	-0.612347	0.0926047	-0.473862	0.214542	-1.03212	1.51415e-06	-0.551855	0.00206307	-0.88389	0.0119096	2.2802	1.26582e-06	0.851011	0.0198562	0.550669	0.000848617	0.250478	0.121846
	AT1G03870	fasciclin-like arabinogalactan-protein 9 (Fla9). Possibly involved in embryogenesis and seed development.	6	-0.557239	0.428842	-1.28381	0.0372059	-3.28589	0.00461141	-0.326791	0.636416	-1.00708	0.112854	-1.45628	7.25393e-05	-0.775992	0.0208591	-0.689001	0.269474	0.910567	0.0856851	1.50961	0.0126961	-0.682746	0.0244899	0.0407153	0.915304
	AT1G05310	Pectin lyase-like superfamily protein;(source:Araport11)	6	-2.4725	1.34665e-05	-1.56475	0.000378186	-2.29172	0.149851	-0.535283	0.0778056	-1.11308	0.00143363	-2.27062	0.0742902	-0.79992	0.456327	0.764367	0.501242	0.395287	0.695251	0.423336	0.728734	-0.680025	0.29825	-0.611601	0.348737
	AT3G14310	encodes a pectin methylesterase, targeted by a cellulose binding protein (CBP) from the parasitic nematode Heterodera schachtii during parasitism.	6	-2.29763	0.113255	-3.32535	0.0155375	-1.01217	8.78891e-05	0.0802327	0.934866	-0.192129	0.844962	-1.36673	0.000187005	-1.16394	0.00148393	-0.736368	0.00353488	0.167516	0.47382	0.261496	0.311449	-0.73332	0.0189977	-0.461858	0.163815
	AT4G23500	Pectin lyase-like superfamily protein;(source:Araport11)	6	-2.2084	0.000218138	-2.21772	0.000194451	-0.886894	0.0389617	-0.438244	0.391701	-0.4753	0.372519	-1.51217	0.000433547	-1.05168	0.0069916	-1.05822	0.0282693	-0.88025	0.0135561	-0.226465	0.57436	-0.119731	0.71384	-0.690865	0.0438671
	AT4G03210	encodes a member of xyloglucan endotransglucosylase/hydrolases (XTHs) that catalyze the cleavage and molecular grafting of xyloglucan chains function in loosening and rearrangement of the cell wall. Gene is expressed in shoot apex region, flower buds, flower stalks and internodes bearing flowers.	1	0.0434855	0.937904	-0.344884	0.51653	-3.47233	0.0657034	-2.52079	3.82866e-05	-2.78717	1.99575e-05	0.0939642	0.824653	0.127589	0.785954	-5.33793	0.0734913	1.39714	0.170772	0.424832	0.767184	-0.244548	0.546099	0.809079	0.0490851
	AT4G23990	encodes a protein similar to cellulose synthase	1	-1.52027	0.0585032	-0.826196	0.278036	1.91768	0.161173	-4.75394	4.38526e-06	-5.42968	6.2217e-06	-0.149926	0.500585	0.516948	0.0255835	-0.941629	0.690521	0.696598	0.851286	-0.548558	0.919338	2.22923	5.74898e-10	1.85136	2.04847e-08
	AT2G03090	member of Alpha-Expansin Gene Family. Naming convention from the Expansin Working Group (Kende et al, 2004. Plant Mol Bio). Involved in the formation of nematode-induced syncytia in roots of Arabidopsis thaliana.	1	-3.42501	0.0219531	-1.8528	0.0799655	-1.69441	0.0218287	-5.89371	0.000800481	-4.19801	0.000342453	0.830429	0.261654	0.00495457	0.995901	-1.32476	0.0681048	2.09321	0.242672	2.00876	0.340132	-0.503221	0.701366	0.329532	0.791349
	AT2G36870	Encodes a xyloglucan endotransglycosylase/hydrolase. Protein sequence and phylogenetic analysis indicates that this enzyme resides in Group III-A of the XTH family, with high similarity to Tropaeolum majus (nasturtium) xyloglucanase 1 (TmNXG1). By sequence similarity to XTH31 (At3g44990) and in vivo analysis, likely to exhibit predominant xyloglucan endo-hydrolase activity (EC 3.2.1.151) with onl…	1	-2.75504	0.000396726	-2.33525	0.00169176	-3.48766	2.32946e-05	-5.67506	2.72251e-05	-5.66565	3.51043e-05	0.953937	0.00647248	-0.0117601	0.979085	-0.621903	0.0940044	1.99825	0.00368074	1.12789	0.143302	2.04624	6.49451e-06	0.104198	0.825302
	AT1G64670	Encodes a epidermally expressed extracellular protein that likely functions as an alpha-beta hydrolase and is required for normal cuticle formation. Homozygous mutant plants are dwarfed and have abnormal leaves, collapsed cells, reduced numbers of trichomes. The specific role of BDG is unclear: it may function in cutin biosynthesis or as a cross-linking enzyme in the cell wall itself.	1	-0.889837	0.0283457	0.136832	0.76184	-3.59243	0.000850995	-3.34595	2.91831e-05	-2.21341	0.00234106	-0.522019	0.209617	0.0549106	0.914503	-1.05983	0.0514091	-0.0873048	0.905973	0.627172	0.381164	-0.528511	0.150038	0.0483915	0.914202
	AT2G04780	fasciclin-like arabinogalactan-protein 7 (Fla7). Possibly involved in embryogenesis and seed development.	1	-1.59598	0.00666059	-1.50109	0.00915291	-2.63624	0.000138769	-3.42611	8.24275e-05	-4.01582	1.87896e-05	-1.59816	9.46208e-05	-1.09253	0.00426966	-1.6826	0.00142803	1.2522	0.0558556	1.28331	0.0849893	-0.338679	0.313433	-0.561911	0.120973
	AT4G31590	encodes a XyG glucan synthase; gene similar to cellulose synthase	1	-0.843167	0.0545521	-1.44501	0.00180333	-2.61045	0.000108539	-4.2257	4.44922e-06	-4.08664	8.15549e-06	-0.530229	0.137615	-0.624922	0.0967341	-1.01008	0.0238076	1.19648	0.0237522	0.661119	0.290701	-1.75033	6.42849e-06	-0.836183	0.00919911
	AT3G05910	Pectinacetylesterase family protein;(source:Araport11)	1	-3.65661	3.80678e-05	-3.48071	5.93969e-05	-2.58124	0.000122096	-3.27414	0.000106862	-2.97684	0.00040445	-0.151542	0.462355	0.15902	0.475885	0.0777633	0.894867	0.972583	0.0337034	0.650476	0.199452	0.317765	0.0979957	0.0736805	0.747453
	AT1G70370	polygalacturonase 2;(source:Araport11)	1	-2.60972	0.000684818	-2.29567	0.00202447	-2.53531	1.31815e-07	-3.27432	0.000211705	-2.97181	0.000762196	0.211775	0.394139	-0.193968	0.474394	-1.72748	1.73685e-05	0.4871	0.0840515	0.235572	0.482019	-0.557385	0.0181668	-0.495623	0.0482942
	AT1G79500	Encodes a protein with 3-deoxy-8-phosphooctulonate synthase (KDOP synthase) activity which is involved in the biosynthesis of KDO, a component of cell wall rhamnogalacturonan II.	1	-3.24739	8.91877e-07	-2.35246	2.82391e-05	-2.11693	5.82867e-05	-2.04142	3.77863e-06	-2.597	3.6399e-07	-1.52498	1.41591e-05	-0.558597	0.0493809	-0.792027	0.0315341	0.120527	0.756511	-0.12889	0.790177	-0.122131	0.650287	-0.206375	0.475186
	AT1G78060	Glycosyl hydrolase family protein;(source:Araport11)	1	-3.46365	1.65467e-06	-2.2137	0.000166949	-2.25608	0.000222217	-3.02589	1.66729e-05	-3.1225	1.5256e-05	-2.45442	0.000323961	-1.6108	0.00217635	-1.0441	0.038042	-0.80185	0.110241	-0.269557	0.659989	-0.563564	0.185539	-0.712324	0.118262
	AT2G39700	putative expansin. Naming convention from the Expansin Working Group (Kende et al, 2004. Plant Mol Bio). Involved in the formation of nematode-induced syncytia in roots of Arabidopsis thaliana.	1	-2.32943	0.000855925	-2.01395	0.00271595	0.578326	0.109755	-3.37808	0.00010936	-2.92942	0.000639614	1.06204	0.000226507	0.431967	0.108483	0.879793	0.0280792	-0.156279	0.686372	-0.882275	0.0446583	0.644541	0.0100652	-0.376242	0.158094
	AT3G46550	Isolated in a screen for salt hypersensitive mutants. Mutants have thinner cell walls, abnormal siliques and root growth is inhibited under salt stress. The gene has similarity to arabinogalactan proteins and domains associated with cell adhesion.SOS5 is required for normal mucilage adherence to seeds.	1	-3.08809	1.01464e-05	-3.17353	7.82947e-06	-1.24827	0.000341936	-3.11114	1.53759e-05	-2.4073	0.000305568	0.200864	0.397633	0.41658	0.091192	1.10551	0.000893058	-0.8077	0.0393498	0.671518	0.0874974	-0.743077	0.00197538	-0.276561	0.250583
	AT5G13870	EXGT-A4, endoxyloglucan transferase,	1	-1.35543	0.000467738	-1.02258	0.00439979	-0.843171	0.348901	-0.93347	0.00792062	-1.31889	0.000845649	-0.394761	0.210849	-0.672071	0.0458701	-0.0140624	0.987809	-1.04959	0.0781282	-0.82184	0.239054	1.33017	0.0001404	0.195955	0.570587
	AT1G53000	Encodes a mitochondrial-localized CMP-KDO (3-deoxy-D-manno-octulosonate) synthetase. This is the enzyme activating KDO as a nucleotide sugar prior to its incorporation into rhamnogalacturonan-II. Heterozygous mutants are defective in pollen development and in pollen tube elongation.	1	-2.50522	0.000386324	-2.47148	0.000433984	-1.09686	0.00761478	-2.08435	0.000222693	-1.47726	0.00505756	-0.512369	0.0541762	-0.161184	0.595334	-0.980948	0.0222343	-0.30755	0.359718	0.194187	0.626152	0.571735	0.0329942	0.978908	0.00136645
	AT4G30440	Encodes a UDP-D-glucuronate 4-epimerase involved in pectin biosynthesis in the cell wall and affects cell wall integrity and immunity to fungi and bacteria.	1	-0.440586	0.37325	-0.581663	0.210937	-0.853565	0.00315827	-2.08222	0.000127083	-1.77788	0.000860816	0.0635517	0.801505	-0.0348591	0.906976	-0.988007	0.00226234	-0.00239828	0.994048	0.277214	0.382278	0.0206145	0.931454	1.66283	3.16429e-07
	AT3G16850	Pectin lyase-like superfamily protein;(source:Araport11)	1	-1.21248	0.0380455	-1.62711	0.00480193	-1.89114	3.44497e-07	-1.90848	0.00338041	-1.88816	0.00451257	0.409465	0.0974274	0.351183	0.18416	-0.781051	0.00252762	-0.504676	0.0253112	0.0756742	0.789824	-1.43067	1.04738e-05	0.754418	0.00467192
	AT5G06390	FASCICLIN-like arabinogalactan protein 17 precursor;(source:Araport11)	1	-1.56967	0.00266024	-1.17838	0.0184691	-1.39443	6.32334e-06	-3.02398	1.86617e-05	-2.65087	0.000120879	-0.302981	0.216849	0.235981	0.381908	-1.53268	1.04203e-05	0.393972	0.113752	0.115987	0.72407	-0.918203	0.000446824	1.08787	0.000169868
	AT3G49220	Plant invertase/pectin methylesterase inhibitor superfamily;(source:Araport11)	1	-1.63113	0.000330445	-0.210649	0.647065	-0.8447	0.00222693	-1.92243	1.63872e-05	-1.96194	1.78677e-05	-2.00003	7.3392e-08	-1.13446	0.000121468	-0.822547	0.00555758	1.94833	9.04434e-07	0.619943	0.0344033	-0.388127	0.0857535	-0.333264	0.173613
	AT1G08200	Encodes a putative UDP-D-apiose/UPD-D-xylose synthetase.	1	-0.236218	0.466718	0.499028	0.127535	-1.38295	4.94697e-05	-1.95557	1.66954e-05	-1.90367	3.17667e-05	-0.680864	0.0119296	-0.524917	0.061285	-0.471351	0.114844	0.361153	0.191137	-0.325624	0.306501	-0.30066	0.231187	-0.293786	0.283727
	AT5G05170	Encodes a cellulose synthase isomer. CESA3 mutants have cellulose defect in the primary cell wall. Multiple lines of evidence suggest that CESA3, along with CESA1 and CESA6 are present in the same plasma membrane complex for cellulose biosynthesis. As inferred from the null role of secondary wall-type CesAs, included in a set of five primary wall-type CesAs that may support trichome cell wall thi…	1	-0.315122	0.867435	-0.472215	0.789057	-1.16759	1.28116e-05	-1.18332	0.45004	-1.25704	0.438748	-1.02228	0.000239672	-0.197693	0.471149	-0.250961	0.275588	1.30867	6.94548e-06	0.609105	0.0117563	-0.474484	0.0435362	-0.50305	0.0474267
	AT3G61130	Encodes a protein with putative galacturonosyltransferase activity. The mRNA is cell-to-cell mobile.	1	-0.0818943	0.887867	-0.451286	0.347566	-1.54351	4.05672e-07	-0.949361	0.0812766	-1.15357	0.0385201	-0.633502	0.00022595	-0.317044	0.0490392	-0.660021	0.00305826	0.952132	6.97804e-05	0.389678	0.0736287	-0.603229	0.000222993	-0.545087	0.00114531
	AT3G03220	member of Alpha-Expansin Gene Family. Naming convention from the Expansin Working Group (Kende et al, 2004. Plant Mol Bio)	1	-0.571525	0.00396581	-0.483052	0.0104235	-0.837902	0.146415	-2.32824	1.95861e-09	-1.97072	1.23689e-08	0.572754	0.122377	0.270428	0.521168	-0.649818	0.282014	1.74744	0.029562	0.213144	0.865568	-0.206547	0.638926	-0.761947	0.127013
	AT3G23820	Encodes a UDP-D-glucuronate 4-epimerase involved in pectin biosynthesis in the cell wall and affects cell wall integrity and immunity to fungi and bacteria. The mRNA is cell-to-cell mobile.	1	-0.883183	0.423941	-1.06073	0.319034	-1.34889	0.000617755	-2.21064	0.0259342	-2.22571	0.0288404	0.576985	0.00672654	0.634144	0.00537463	-0.325222	0.425316	0.916898	0.0145529	0.442322	0.274238	0.337832	0.0762064	0.654478	0.00277841
	AT1G31070	Encodes a protein that functions as an N-acetylglucosamine-1-phosphate uridylyltransferase that catalyzes the formation of UDP-N-acetylglucosamine (UDP-GlcNAc). This is an essential precursor for glycolipid and glycoprotein synthesis and is also used for regulatory protein modification in signaling pathways. The enzyme can also catalyze the reverse reaction using both UDP-GlcNAc and the less comm…	1	-1.09396	0.00272611	-0.502866	0.143091	-1.63942	0.00146471	-1.58139	0.000174862	-1.72605	8.94307e-05	-0.0323775	0.879966	0.356285	0.0794486	-0.784529	0.0708568	0.493118	0.245003	0.111262	0.855452	0.0749663	0.694975	-0.10851	0.601602
	AT5G60920	Encodes a glycosylphosphatidylinositol-anchored protein localized primarily in the plasma membrane of the longitudinal sides of root cells. Necessary for oriented cell expansion in Arabidopsis. Cob mutants have abnormal roots that expand radially rather than longitudinally under certain growth conditions.	1	-0.994242	0.475248	-1.31666	0.307303	-0.916077	0.000257252	-1.65067	0.172591	-1.67245	0.17912	0.182692	0.496049	0.335589	0.228381	-0.185517	0.458383	0.137815	0.550368	-0.209495	0.407883	-0.16556	0.50694	-0.192082	0.48221
	AT5G22740	Encodes a beta-mannan synthase based on in vitro enzyme assays from heterologously expressed protein. CSLA2 synthesizes the backbone of galactoglucomannan in seed coat epidermal cells. Both CSLA2 and MUCI10, which may be part of a protein complex, are critical for mucilage architecture.	1	-1.61856	0.000206477	-0.834438	0.0288015	-0.874605	0.0295	-3.13372	1.15836e-06	-3.07083	1.87204e-06	-0.584494	0.00365045	-0.702237	0.0013711	-0.653212	0.120157	0.399772	0.316863	-0.696158	0.174223	-0.984657	1.1896e-05	-1.03692	1.25538e-05
	AT4G32410	Encodes a cellulose synthase isomer. CESA1 mutants have cellulose defect in the primary cell wall. Multiple lines of evidence suggest that CESA1, along with CESA3 and CESA6 are present in the same plasma membrane complex for cellulose biosynthesis. lasma membrane complex for cellulose biosynthesis. As inferred from the null role of secondary wall-type CesAs, included in a set of five primary wall…	1	-1.45607	0.346615	-1.54109	0.299953	-1.48928	3.90005e-07	-1.98681	0.159821	-1.97695	0.174808	-1.13848	2.10092e-06	-0.544085	0.0060724	-0.717651	0.00159708	0.0234773	0.916009	-0.0570119	0.8203	-0.758953	0.000118689	-0.680411	0.000705661
	AT3G54690	Sugar isomerase (SIS) family protein;(source:Araport11)	1	-1.08318	0.0198941	-1.27692	0.00527749	-1.97843	8.17218e-05	-2.36278	4.56477e-06	-2.75778	9.2144e-07	-0.848798	0.00081577	-0.575524	0.0206622	-0.618859	0.0740911	0.566272	0.0514762	0.543566	0.101938	-1.20113	1.27945e-05	-0.732995	0.00347577
	AT4G29240	Leucine-rich repeat (LRR) family protein;(source:Araport11)	7	-1.53093	0.0726865	-2.74347	0.0271488	-5.48369	0.0247909	-3.28245	0.00160057	-4.80074	0.00108381	-1.23399	0.10952	-1.51867	0.0722551	-3.18439	0.0967023	0.560545	0.868745	2.12225	0.520472	-4.02753	0.00893154	-3.70673	0.0199838
	AT4G38770	Encodes one of four proline-rich proteins in Arabidopsis which are predicted to localize to the cell wall. Transcripts are most abundant in aerial organs of the plant.	7	-2.39865	0.0278605	-2.287	0.0333653	-3.97243	1.22089e-07	-6.20427	1.38606e-05	-5.6988	4.76829e-05	-5.64893	4.16675e-05	-3.36399	4.00256e-05	-0.633829	0.225859	-1.82126	0.00019204	-0.320415	0.522884	-3.98953	0.000793998	-4.07451	0.00114645
	AT4G28250	putative beta-expansin/allergen protein. Naming convention from the Expansin Working Group (Kende et al, 2004. Plant Mol Bio). Involved in the formation of nematode-induced syncytia in roots of Arabidopsis thaliana.	7	-2.20999	0.0421424	-1.23537	0.176717	-1.33429	0.00694361	-5.79845	0.00046697	-5.26787	0.000837262	-1.68641	0.0937782	-0.870486	0.299147	-0.176315	0.712013	0.322258	0.824985	0.583316	0.717906	-4.17081	0.000360056	-3.03879	0.00115055
	AT5G03760	encodes a beta-mannan synthase that is required for agrobacterium-mediated plant genetic transformation involves a complex interaction between the bacterium and the host plant. 3' UTR is involved in transcriptional regulation and the gene is expressed in the elongation zone of the root.	7	-2.99101	0.000264148	-3.176	0.000260087	-3.48069	4.03437e-05	-6.04796	8.477e-05	-5.70437	0.000169936	-2.74905	0.000889376	-2.7028	0.00106304	-1.00135	0.0274761	1.16646	0.144055	0.642172	0.526494	-4.18336	4.59651e-11	-2.72926	1.71607e-08
	AT1G67750	Pectate lyase family protein;(source:Araport11)	7	-4.40511	0.0336768	-3.83573	0.060312	-5.43874	0.000188149	-8.87179	8.60675e-05	-7.49239	6.73164e-05	-1.64904	0.00426387	-2.16535	0.000875387	-1.4721	0.00332527	1.18379	0.549647	1.28067	0.573358	-1.03989	0.0417708	-2.84143	2.48993e-05
	AT5G65730	xyloglucan endotransglucosylase/hydrolase 6;(source:Araport11)	7	-4.01968	0.0146579	-4.38257	0.00756893	-7.95421	0.0392491	-6.7322	0.000498913	-6.37895	0.000974625	-3.91637	4.23769e-10	-3.23569	1.12667e-08	-0.344645	0.666025	0.317837	0.635595	1.05901	0.142845	-1.45728	2.24751e-05	-2.03707	5.85945e-07
	AT2G37640	member of Alpha-Expansin Gene Family. Naming convention from the Expansin Working Group (Kende et al, 2004. Plant Mol Bio). Involved in the formation of nematode-induced syncytia in roots of Arabidopsis thaliana.	7	-1.19657	0.00250898	-0.644592	0.0844972	-7.04794	0.00127437	-5.22046	6.28919e-09	-4.68375	1.87564e-08	-4.08842	1.4851e-06	-3.75084	3.85682e-06	-1.34724	0.0114175	-0.475661	0.390955	-0.406846	0.549152	-1.19271	0.0151134	-1.70965	0.00196068
	AT4G23820	Pectin lyase-like superfamily protein;(source:Araport11)	7	-2.46698	0.0210641	-1.68712	0.11798	-5.40954	1.42815e-05	-3.56711	1.56555e-05	-4.19303	3.30369e-06	-1.37373	6.9911e-06	-1.0321	0.000330024	-2.15317	0.000446794	0.176476	0.721387	0.019292	0.977627	-0.362668	0.109962	-0.64724	0.0105817
	AT2G23130	AGP17 is a lysine-rich arabinogalactan-protein (AGP) and part of a multi-gene family of glycoproteins with approx. 50 members. It falls into one subclass with AGP18 and AGP19, other lysine-rich AGPs. 84% of its proline residues are hydroxylated to hydroproline and its heavy glycosylation accounts for appr. 69% of the molecular weight. The main glycosyl residues are arabinose (30.1%) and galactose…	7	-3.60666	0.113349	-3.21124	0.16045	-6.82231	0.00967235	-3.3913	0.137574	-3.41281	0.145215	-3.13707	5.09715e-06	-1.60114	0.0027202	-1.15057	0.0645148	-0.0583085	0.931523	0.668377	0.299246	0.844925	0.120674	0.0935865	0.898243
	AT5G55730	Encodes fasciclin-like arabinogalactan-protein 1 (Fla1). fla1 mutants show defects in shoot regeneration. Possibly involved in embryogenesis and seed development.	7	-1.4355	0.0143805	-1.408	0.0220545	-2.86052	5.37785e-06	-7.66909	6.4862e-06	-6.81674	7.56173e-06	-0.755629	0.0895721	-0.278542	0.580726	-2.08036	4.16319e-05	-0.679368	0.315226	-0.0780721	0.931012	-1.96598	0.000156682	-1.2902	0.00748846
	AT4G12730	AF333971 Arabidopsis thaliana fasciclin-like arabinogalactan-protein 2 (Fla2) mRNA, complete cds. Fasciclin-like arabinogalactan protein. Possibly involved in embryogenesis and seed development.	7	-1.40518	0.0122839	-1.79634	0.00146338	-5.2192	2.17735e-05	-5.19469	2.36001e-07	-5.17316	3.46969e-07	-1.22314	0.000112292	-0.772313	0.00966895	-1.82101	0.000717891	1.85563	0.00136466	1.1858	0.0516935	-0.72157	0.00767766	-0.750502	0.00966812
	AT1G11545	xyloglucan endotransglucosylase/hydrolase 8;(source:Araport11)	7	-2.30027	0.000113955	-1.52475	0.00295407	-6.00168	0.00661787	-6.65586	1.03114e-06	-6.90981	1.30208e-06	-1.12971	0.0157763	-0.331581	0.495298	-2.66895	0.0109208	2.30272	0.0132719	0.333151	0.811095	-1.15513	0.00809875	-1.23221	0.00846022
	AT5G26670	Pectinacetylesterase family protein;(source:Araport11)	7	-4.07669	0.0163831	-4.28233	0.0121992	-3.67171	0.0101966	-6.2374	0.000346747	-6.60512	0.000244945	-2.14376	9.54248e-08	-1.4695	2.06646e-05	-3.21365	0.0167121	-0.592326	0.848506	-2.00545	0.540006	-0.542192	0.0296256	-0.688861	0.011754
	AT2G40610	member of Alpha-Expansin Gene Family. Naming convention from the Expansin Working Group (Kende et al, 2004. Plant Mol Bio). Involved in the formation of nematode-induced syncytia in roots of Arabidopsis thaliana.	7	-3.76868	0.00272549	-4.96112	0.000323343	-6.21246	0.001198	-6.71084	0.000213247	-5.65921	0.00108665	-0.169194	0.73194	-1.27967	0.0106346	-0.306879	0.715161	-1.25133	0.142731	-0.68064	0.483752	-0.787731	0.0687454	-2.4381	2.44217e-05
	AT2G45470	Fasciclin-like arabinogalactan protein. Possibly involved in embryogenesis and seed development.	7	-2.77059	0.000258848	-2.62265	0.000410197	-4.563	9.30446e-09	-5.47072	1.00165e-05	-5.19234	2.22914e-05	-1.5977	9.55052e-05	-1.58994	0.000187442	-1.12069	0.00157384	-0.316158	0.380067	0.624195	0.106041	-1.47373	0.000110562	-1.36128	0.000492305
	AT4G37800	xyloglucan endotransglucosylase/hydrolase 7;(source:Araport11)	7	-3.08044	0.0162524	-4.15606	0.00187581	-4.68961	0.00083106	-6.7805	0.000563332	-6.24519	0.00132491	-2.10053	2.03214e-07	-2.02619	1.04795e-06	-1.19058	0.0859973	0.335199	0.674024	1.51305	0.0647058	-0.504726	0.05316	-1.54418	8.19687e-06
Secondary metabolism	AT2G37040	Encodes PAL1, a phenylalanine ammonia-lyase. Arabidopsis has four PALs: AT2G37040 (PAL1), AT3G53260 (PAL2), AT5G04230 (PAL3) and AT3G10340 (PAL4).	2	4.60009	3.53385e-08	5.43763	6.11299e-09	1.04614	0.113419	3.9794	2.15563e-07	3.71524	6.12424e-07	0.873145	0.0130224	0.161563	0.687885	0.923222	0.206163	-0.135898	0.853424	-0.106916	0.9056	2.39883	3.3448e-07	1.60512	0.000105207
	AT2G30490	Encodes a cinnamate-4-hydroxylase. Mutations in this gene impact phenylpropanoid metabolism, growth and development.	2	4.17912	4.29335e-06	4.53446	1.67737e-06	1.09264	0.0489475	3.87069	1.34498e-05	3.20329	0.000117454	2.29603	2.79135e-07	0.977714	0.0037579	0.504436	0.429403	0.888533	0.0972822	0.564799	0.358527	0.738556	0.0131653	-0.0166351	0.963996
	AT4G39230	encodes a protein whose sequence is similar to phenylcoumaran benzylic ether reductase (PCBER), which catalyzes NADPH-dependent reduction of 8-5' linked lignans such as dehydrodiconiferyl alcohol to give isodihydrodehydrodiconiferyl alcohol.	2	3.71227	1.47107e-07	5.1518	3.846e-08	2.8147	0.000372349	3.09433	5.13529e-08	3.08387	9.22711e-08	1.89947	3.73078e-07	1.4463	2.30847e-05	1.22795	0.131296	1.96021	0.000727718	1.15063	0.0610528	2.30859	6.60199e-09	1.50858	5.44406e-06
	AT5G54160	A caffeic acid/5-hydroxyferulic acid O-methyltransferase. Interacts with 14-4-3 proteins in yeast 2 hybrid assay. AtOMT1 (At5g54160) encodes a flavonol 3?-O-methyltransferase that is highly active towards quercetin and myricetin. The substrate specificity identifies the enzyme as flavonol 3?-methyltransferase which replaces the former annotation of the gene to encode a caffeic acid/5-hydroxyferul…	2	3.01737	0.00783176	2.8463	0.0112839	0.4645	0.309558	3.53518	0.0029359	3.32264	0.00521193	0.978656	0.000186957	1.05641	0.000173845	0.895158	0.0729217	1.22376	0.01185	0.98977	0.0570053	3.15656	7.03857e-12	2.95714	6.53914e-11
	AT5G05600	Encodes a protein with similarity to flavonol synthases that is involved in the detoxifcation polycyclic aromatic hydrocarbons.One of 4 paralogs encoding a 2-oxoglutarate/Fe(II)-dependent oxygenases that hydroxylates JA to 12-OH-JA.	2	3.02398	0.000265975	3.98469	3.07866e-05	-0.106995	0.954949	2.10622	0.000252615	1.84677	0.000801696	1.46125	8.52778e-06	0.460509	0.0919486	1.55183	0.326749	-0.296707	0.788053	0.408494	0.748035	3.64334	4.80386e-11	2.47352	4.04798e-08
	AT5G52810	SAR-DEFICIENT4 (SARD4) alias ORNITHINE CYCLODEAMINASE/m-CRYSTALLIN (ORNCD1) is involved in the biosynthesis of pipecolic acid. The reductase converts dehydropipecolic acid intermediates generated from L-Lysine by AGD2-LIKE DEFENSE RESPONSE PROTEIN1 (ALD1) to pipecolic acid (PMID:28330936).	2	1.73777	0.00011709	2.36619	9.89492e-06	3.32291	4.60873e-08	3.24285	0.000175418	3.32273	0.000227724	-0.677296	0.0703675	-0.502789	0.210054	0.722713	0.0555466	-0.654146	0.139342	-0.285921	0.595886	0.844547	0.020354	0.100437	0.817531
	AT1G72680	cinnamyl-alcohol dehydrogenase;(source:Araport11)	2	2.49736	4.66627e-06	2.51276	2.16866e-06	2.61956	1.61299e-06	4.42233	6.86867e-09	3.69737	1.44714e-08	-1.22744	4.55496e-05	-0.676107	0.0124713	0.716753	0.112046	-1.17443	0.000351937	-0.680253	0.0321146	-0.424776	0.0738233	-0.166544	0.536309
	AT4G31500	Encodes an oxime-metabolizing enzyme in the biosynthetic pathway of glucosinolates. Is required for phytochrome signal transduction in red light. Mutation confers auxin overproduction.	2	3.41276	0.00653819	3.30682	0.00802447	1.66676	5.21596e-05	3.00826	0.0217263	2.67544	0.0424151	-1.23019	2.25909e-05	0.0310379	0.920426	0.604823	0.0881729	-0.110361	0.750202	0.773636	0.0348027	-1.07751	5.85371e-05	0.248487	0.314344
	AT5G22300	encodes a nitrilase isomer. The purified enzyme shows a strong substrate specificity for beta-cyano-L-alanine, a intermediate product of the cyanide detoxification pathway. The mRNA is cell-to-cell mobile.	2	3.75926	7.53677e-07	3.20578	3.67158e-07	2.11759	0.0143292	3.18618	5.93127e-05	2.73734	0.000174073	-1.5147	9.78596e-05	-0.911431	0.00915614	0.271381	0.82993	-0.0996268	0.931523	0.0830571	0.954089	-1.0195	0.00163545	-0.330448	0.314344
	AT3G21240	encodes an isoform of 4-coumarate:CoA ligase (4CL), which is involved in the last step of the general phenylpropanoid pathway. The catalytic efficiency was in the following (descending) order: p-coumaric acid, caffeic acid, ferulic acid, 5-OH-ferulic acid and cinnamic acid. At4CL2 was unable to use sinapic acid as substrate.	2	2.66977	4.09958e-07	3.71322	4.39742e-08	0.0435601	0.948138	3.35204	3.26566e-06	2.95812	7.90199e-06	0.766468	8.99203e-05	0.203666	0.256193	-0.406365	0.57306	-1.03189	0.0744882	-0.571478	0.367189	1.26954	6.41888e-08	0.48163	0.00629893
	AT4G11820	Encodes a protein with hydroxymethylglutaryl-CoA synthase activity which was characterized by phenotypical complementation of the S. cerevisiae mutant. Involved in glucosinolate biosynthesis.	2	1.43229	0.0110445	1.14555	0.0227846	-0.0425637	0.863205	1.75659	0.00286417	1.2627	0.0184353	0.657251	0.00391986	0.735391	0.00267908	-0.317465	0.184672	0.274636	0.164628	-0.303415	0.200661	2.98875	1.07347e-11	1.30729	3.84407e-06
	AT2G22570	encodes a nicotinamidase that converts nicotinamide into nicotinic acid. As such the encoded enzyme is involved in the pyridine nucleotide salvage pathway which may be connected to the de novo NAD biosynthesis through the ABA signaling pathway.	2	-0.318895	0.276728	-0.0199622	0.95368	0.545975	0.438876	1.84858	7.89971e-06	1.7634	1.72583e-05	0.403639	0.195885	0.680016	0.0418417	-0.524167	0.583165	0.658551	0.386561	0.694785	0.436466	2.023	1.03969e-06	1.6129	3.74215e-05
	AT4G36220	encodes ferulate 5-hydroxylase (F5H). Involved in lignin biosynthesis.	2	1.38914	0.0681881	1.54675	0.0393723	1.15652	0.0020048	0.970689	0.252382	1.6455	0.0595959	1.82272	5.13873e-07	1.92692	8.60445e-07	0.746206	0.0485445	0.474413	0.168839	0.297289	0.459858	1.80756	2.1438e-07	1.59057	2.50972e-06
	AT3G51430	Although this enzyme is predicted to encode a strictosidine synthase (SS), it lacks a conserved catalytic glutamate residue found in active SS enzymes and it is not expected to have SS activity.	2	0.673125	0.0356022	0.50419	0.0884576	2.58843	1.97254e-05	2.60165	1.65199e-07	2.53437	3.29387e-07	-0.336109	0.120047	0.365596	0.112914	0.982962	0.0655136	-1.72753	0.000265625	-0.137677	0.782285	1.26	4.40598e-06	2.05519	8.82366e-09
	AT2G33590	Encodes a protein with homology to members of the dihydroflavonol-4-reductase (DFR) superfamily. The expression pattern of AtCRL1 indicates that CRL1 has a role in embryogenesis and seed germination. AtCRL1 is induced by ABA, drought and heat, and is highly expressed in seeds. The mRNA is cell-to-cell mobile.	2	2.16519	1.71308e-07	2.006	9.72797e-08	1.21042	0.000259224	1.02837	0.00127408	1.15482	0.00082773	0.112718	0.844309	-0.353237	0.561726	1.09052	0.00157773	-1.29858	0.000152729	-0.908876	0.00658417	1.90533	2.82342e-05	2.1805	1.10068e-05
	AT5G24530	Encodes a putative 2OG-Fe(II) oxygenase that is defense-associated but required for susceptibility to downy mildew. The mRNA is cell-to-cell mobile.	2	0.791288	0.0138068	0.952336	0.00376171	3.62502	1.8017e-08	1.56267	0.001679	2.39374	0.000160003	0.943486	0.000123623	0.548078	0.0166254	1.75345	8.03291e-05	0.860917	0.00866068	0.927758	0.0102133	0.876311	0.000170289	0.541806	0.0152785
	AT2G39980	HXXXD-type acyl-transferase family protein;(source:Araport11)	2	0.756879	0.429488	1.0806	0.245904	1.28686	0.139716	0.211427	0.671216	0.748308	0.165954	-1.14897	0.000258075	-0.683039	0.0195167	2.02792	0.0304031	-1.41678	0.0115012	-0.851699	0.160288	1.21962	6.39284e-05	-0.882529	0.00387164
	AT4G05160	Encodes a peroxisomal protein involved in the activation of fatty acids through esterification with CoA. At4g05160 preferentially activates fatty acids with medium chain length (C6:0 and C7:0) as well as even-numbered long-chain fatty acids (C14:0, C16:0 and C18:0). At4g05160 was also able to catalyze the conversion of OPC-6:0 to its CoA ester and is therefore thought to be involved in the peroxi…	2	0.512886	0.0701472	0.407648	0.126134	0.684508	0.00385716	1.59039	2.04933e-05	1.30054	0.000149749	-0.391267	0.0274514	-0.324063	0.0822322	-0.241618	0.354624	0.161122	0.483904	0.619947	0.0157193	1.2655	1.84053e-07	1.03643	5.54151e-06
	AT1G35190	2-oxoglutarate (2OG) and Fe(II)-dependent oxygenase superfamily protein;(source:Araport11)	2	0.261281	0.21782	-0.0014507	0.994601	0.856663	0.0282973	0.517052	0.00930041	0.40084	0.0412636	-0.331593	0.0512046	-0.293068	0.104076	0.513492	0.24028	1.15708	0.000743691	0.87063	0.0159296	1.57575	4.03157e-09	0.871467	2.95667e-05
	AT2G34630	Encodes a geranyl diphosphate synthase. RNAi lines are dwarf. T-DNA knock-out lines are embryo lethal.	2	0.500441	0.230431	0.41728	0.290944	0.508792	0.0283982	0.290048	0.567632	0.194921	0.718587	0.592033	0.00132745	0.455951	0.0139118	0.616276	0.0162512	0.366165	0.108212	0.343801	0.190741	-0.37523	0.0238095	-0.0692052	0.720411
	AT4G19010	Encodes for a 4-coumarate-CoA ligase involved in the biosynthesis of the benzenoid ring of ubiquinone from phenylalanine.	2	0.240301	0.276922	-0.364859	0.0602007	0.159922	0.758933	0.629328	0.00222506	0.52742	0.00909521	-0.382868	0.36964	-0.480765	0.281683	-0.0605785	0.923773	0.804708	0.0340183	0.795958	0.0667508	-0.432231	0.249203	-0.0940432	0.830765
	AT1G77670	Pyridoxal phosphate (PLP)-dependent transferases superfamily protein;(source:Araport11)	2	0.434651	0.0811873	0.0461255	0.85598	0.113406	0.762709	0.0249484	0.924546	0.151551	0.566905	-0.295804	0.164686	-0.248911	0.278294	0.247025	0.518843	0.692428	0.0809612	0.345688	0.486028	-0.513454	0.0124044	-0.298015	0.165331
	AT4G16330	2-oxoglutarate (2OG) and Fe(II)-dependent oxygenase superfamily protein;(source:Araport11)	2	-0.197273	0.330852	-0.0677026	0.749909	-0.0344912	0.906551	0.604293	0.00320616	0.431116	0.0274767	-0.0942341	0.714426	-0.382144	0.129206	-0.119533	0.693928	-0.10295	0.653635	0.639494	0.00957119	0.793634	0.00127167	0.488634	0.0468315
	AT5G12210	RAB geranylgeranyl transferase beta subunit 1;(source:Araport11)	2	-0.366024	0.189306	-0.408428	0.125476	0.441581	0.0792655	0.280247	0.253472	0.159473	0.540764	0.341725	0.0556387	0.134321	0.501322	0.415115	0.131808	-0.467945	0.041861	-0.547406	0.0389308	1.10666	1.33396e-06	0.387298	0.0364575
	AT3G02780	Encodes a protein with isopentenyl diphosphate:dimethylallyl diphosphate isomerase activity. There is genetic evidence that it functions in the mevalonate, but not the MEP biosynthetic pathway.	2	0.423021	0.19213	0.755752	0.0225721	-0.0168353	0.948138	1.04972	0.00653906	0.917546	0.016724	0.0922586	0.761763	0.118557	0.718888	0.8708	0.00121317	0.703123	0.00303748	0.0838331	0.764738	0.920913	0.00129344	0.367117	0.1974
	AT3G11950	publications Tian et al (2007) and Sadre et al (2006) refer to At3g11950. The prenyltransferase gene studied is actually At3g11945 which arises from a split of the previous At3g11950 gene model.	2	0.931317	0.167545	1.17249	0.0792054	0.39763	0.340692	1.31491	0.0455856	1.41085	0.0403241	0.0704063	0.822993	0.021698	0.954154	0.366881	0.431324	0.524296	0.174616	-0.0161814	0.97942	-0.482771	0.0924444	0.0888632	0.791136
	AT2G39550	encodes the beta subunit of geranylgeranyl transferase (GGT-IB), involved in both ABA-mediated and auxin signaling pathways.	2	1.30725	0.000599778	1.46868	0.000157041	0.906105	0.0103789	1.03805	0.00234932	1.04472	0.00300955	-0.404538	0.0378023	-0.48686	0.0197217	0.355565	0.376893	-0.00292065	0.993366	-0.270836	0.454152	0.874831	6.59364e-05	0.564956	0.00652815
	AT1G18590	encodes a desulfoglucosinolate sulfotransferase, involved in the final step of glucosinolate core structure biosynthesis. Has a broad-substrate specificity with preference with methionine-derived desulfoglucosinolates.	2	0.948023	0.000526776	0.433646	0.0379886	-0.402739	0.391283	0.607838	0.190865	0.018228	0.97263	1.88149	3.27573e-06	1.15994	0.00115861	-0.545821	0.292025	0.191125	0.815227	1.08709	0.169788	1.44043	0.000169777	1.45444	0.000284785
	AT4G01070	the glycosyltransferase (UGT72B1) is involved in metabolizing xenobiotica (chloroaniline and chlorophenole). Comparison between wild type and knock-out mutant demonstrates the central role of this gene for metabolizing chloroaniline but significantly less for chlorophenole. The glucosyltransferase preferred UDP-xylose over UDP-glucose indicating its (additional) functioning as a xylosyltransferas…	2	0.289033	0.725661	0.595244	0.441528	0.997073	0.000367969	-0.32465	0.75432	-0.328078	0.764324	1.18088	0.000345413	1.44746	9.2372e-05	-0.258117	0.341808	-0.353424	0.172135	-0.367913	0.221316	-0.266856	0.343495	1.51089	3.04115e-05
	AT2G23910	NAD(P)-binding Rossmann-fold superfamily protein;(source:Araport11)	7	0.503441	0.42689	1.51534	0.0122921	0.461122	0.456208	3.67091	0.0226411	1.01155	0.631719	1.00689	0.000626375	0.731869	0.0118021	-6.33982	0.00594461	0.613933	0.418856	-1.41479	0.241086	0.264704	0.290113	1.8917	3.65513e-07
	AT4G34050	Methyltransferase in the lignin biosynthetic pathway.	5	2.68742	0.0010979	3.75484	0.000119941	0.940509	0.00038648	1.58278	0.071251	1.25548	0.156514	0.670029	0.279617	0.575653	0.388153	-0.466549	0.0633172	0.437188	0.0696106	0.84924	0.00319186	5.92781	8.85138e-06	4.83734	0.000195397
	AT1G20510	OPC-8:0 CoA ligase1;(source:Araport11)	5	2.80185	2.42911e-07	2.53803	1.80525e-07	1.19265	1.03294e-05	1.44215	0.000466707	1.71107	0.000206711	0.627933	0.340015	0.0887512	0.920696	0.533145	0.018195	-0.595833	0.0100928	-0.172206	0.509071	6.14348	9.98274e-05	4.34822	0.00584237
	AT1G12140	Encodes a glucosinolate S-oxygenase that catalyzes the conversion of methylthioalkyl glucosinolates to methylsulfinylalkyl glucosinolates. It is a suppressor of the bp mutant phenotype.	5	0.641771	0.064958	0.980043	0.00729435	0.818712	0.00173536	0.669043	0.0531859	0.686147	0.0560438	2.78734	0.00804136	1.35706	0.280119	0.0439816	0.894705	-0.155697	0.518782	0.185648	0.498093	6.81531	7.24206e-08	6.04962	8.64105e-07
	AT5G48930	At5g48930 has been shown to encode for the hydroxycinnamoyl-Coenzyme A shikimate/quinate hydroxycinnamoyltransferase (HCT) both synthesizing and catabolizing the hydroxycinnamoylesters (coumaroyl/caffeoyl shikimate and quinate) involved in the phenylpropanoid pathway. Influence on the accumulation of flavonoids which in turn inhibit auxin transport and reduce plant growth. The mRNA is cell-to-cel…	5	1.07882	0.226034	1.77281	0.0544792	-0.188378	0.618063	0.097777	0.929571	0.170144	0.880356	2.2176	6.66979e-07	1.47069	0.000157567	0.715221	0.070033	1.1748	0.00310674	0.853233	0.0376787	4.28677	1.09334e-11	2.61815	3.69946e-08
	AT1G31910	GHMP kinase family protein;(source:Araport11)	5	0.239576	0.820531	0.0963306	0.926636	0.771908	0.00011643	0.463608	0.623704	0.428669	0.666922	1.52336	0.00161111	1.22149	0.0125428	0.69598	0.000781401	0.333615	0.0518206	0.356569	0.0617147	4.84165	2.9134e-10	2.78875	1.90646e-06
	AT3G19450	Encodes a catalytically active cinnamyl alcohol dehydrogenase which uses p-coumaryl aldehyde as a preferred substrate. It can also use caffeyl, coniferyl and d-hydroxyconiferyl aldehydes as substrates. The mRNA is cell-to-cell mobile.	5	1.60107	0.00082257	1.86894	0.000194242	1.05004	0.000872929	0.69216	0.247917	0.998417	0.119831	0.652627	0.762445	1.16911	0.58945	1.96269	8.02978e-06	-0.713853	0.0184389	-1.19621	0.00177229	5.94755	0.000274242	2.77611	0.126349
	AT1G15950	Encodes a cinnamoyl CoA reductase. Involved in lignin biosynthesis. The mRNA is cell-to-cell mobile.	5	1.47192	0.000765075	1.84195	0.000102451	0.453823	0.257322	0.12905	0.797771	0.25606	0.622227	1.56021	5.38078e-06	1.21894	0.000179845	0.138229	0.784919	-1.21353	0.00614595	-0.653701	0.161843	4.58803	4.58129e-13	2.84016	8.34662e-10
	AT5G42830	HXXXD-type acyl-transferase family protein;(source:Araport11)	6	6.24202	5.25796e-06	6.77084	3.19594e-06	4.69074	6.40301e-05	5.83423	0.000233023	5.76158	0.00034118	1.02557	0.00560493	0.27852	0.489461	2.6581	0.016456	1.62277	0.0275656	1.27333	0.13289	2.14744	1.38016e-06	1.19692	0.00192936
	AT1G61120	Encodes a geranyllinalool synthase that produces a precursor to TMTT, a volatile plant defense C16-homoterpene. GES transcript levels rise in response to alamethicin, a fungal peptide mixture that damages membranes. This transcriptional response is blocked in JA biosynthetic and JA signaling mutants, but GES transcript levels still rise in response to alamethicin in mutants with salicylic acid an…	6	3.99815	0.000289786	4.24671	0.000160542	7.1921	0.0640006	4.84345	0.00185238	5.68514	0.000653377	2.94985	0.0268831	-0.749113	0.736554	5.55504	0.199303	-0.214291	0.887957	0.883415	0.552804	0.922093	0.727513	0.997231	0.73331
	AT1G17020	Encodes a novel member of the Fe(II)/ascorbate oxidase gene family; senescence-related gene.	6	4.66633	0.00606981	4.30418	0.0104415	3.91277	0.0462065	8.16513	0.000304201	6.52394	0.00115734	-1.50045	0.0398012	-2.03421	0.0166091	1.67525	0.511165	-0.169011	0.94937	1.67641	0.47848	-1.29344	2.94862e-05	-0.363489	0.183525
	AT1G18570	Encodes a member of the R2R3-MYB transcription family. Involved in indole glucosinolate biosynthesis. The mRNA is cell-to-cell mobile.	6	3.3938	8.62275e-06	2.18758	5.91225e-05	3.19621	1.31815e-07	4.78082	8.79161e-08	5.15393	1.35267e-07	-2.66565	0.162966	-2.3418	0.257687	1.87499	0.000113195	1.24211	0.000642165	1.19488	0.00221875	-0.814218	0.186235	-0.319265	0.632393
	AT4G35160	Encodes a cytosolic N-acetylserotonin O-methyltransferase that can convert N-acetylserotonin to melatonin and serotonin to 5-methoxytryptamine in the process of melatonin synthesis. It does not have caffeic acid O- methyltransferase activity.	6	4.71065	0.000623108	5.10156	0.000304549	2.00296	0.573752	2.11766	0.0383757	1.62234	0.122731	-2.01627	1.08745e-07	-0.891848	0.00109862	3.99036	0.226518	-3.28314	0.173084	-0.734502	0.751671	-1.20986	1.49653e-05	-0.3938	0.10425
	AT2G29740	UDP-glucosyl transferase 71C2;(source:Araport11)	9	3.18277	1.01668e-06	1.66107	0.000423731	0.102654	0.976225	7.40247	1.68024e-06	7.9976	1.01426e-06	0.192295	0.602405	0.333493	0.378892	4.66434	0.0647031	3.85248	0.0883453	2.41919	0.394321	2.29903	3.81911e-07	1.27431	0.000836948
	AT5G08640	Encodes a flavonol synthase that catalyzes formation of flavonols from dihydroflavonols. Co-expressed with CHI and CHS (qRT-PCR).	8	-2.80664	0.00907543	-0.800115	0.277993	-1.17474	0.212013	-5.76182	3.71569e-06	-4.77544	2.01826e-06	-1.63804	0.000784696	-2.32121	0.000141641	-2.00678	0.0961052	6.10539	0.00279419	1.15583	0.716658	-2.43136	1.62183e-07	-0.68618	0.0503019
	AT5G13930	Encodes chalcone synthase (CHS), a key enzyme involved in the biosynthesis of flavonoids. Required for the accumulation of purple anthocyanins in leaves and stems. Also involved in the regulation of auxin transport and the modulation of root gravitropism. The mRNA is cell-to-cell mobile.	8	-0.643334	0.472947	-0.41761	0.651408	-1.50275	0.399297	-6.51297	0.0198746	-5.89995	0.0366382	-2.66001	0.00134071	-4.1056	0.000703542	0.579246	0.662008	0.697788	0.862455	0.965774	0.838632	-2.35946	0.000238133	-0.796275	0.191977
	AT5G05270	Chalcone-flavanone isomerase family protein;(source:Araport11)	8	0.237094	0.865777	-0.361106	0.824748	-2.54933	0.135039	-5.75635	2.0754e-05	-5.66414	2.49723e-05	-0.103043	0.690087	0.554009	0.0257567	-2.97088	0.128627	2.27464	0.268302	-1.7615	0.607787	2.13724	9.21302e-07	1.91036	8.62838e-06
	AT1G53520	Encodes a plastid stroma localized fatty acid binding protein involved in fatty acid metabolism.	8	-3.13702	1.95182e-05	-0.920907	0.0252247	-6.59479	0.00698942	-7.70756	5.15507e-06	-7.58396	7.89852e-06	-0.70375	0.000746344	-0.533117	0.00995995	-5.08639	0.0181626	0.759114	0.543232	-0.194387	0.917184	-0.638252	0.00164173	-0.450946	0.0262114
	AT3G60290	2-oxoglutarate (2OG) and Fe(II)-dependent oxygenase superfamily protein;(source:Araport11)	3	-4.48288	0.00245295	-5.3848	0.00052054	-5.72908	0.0178952	-3.30723	0.000275408	-3.13369	0.000542278	-3.47907	0.103003	-2.90956	0.204619	1.17983	0.0512703	1.26467	0.00412281	0.964125	0.038482	0.426629	0.665392	-2.94067	0.124884
	AT3G21420	LATERAL BRANCHING OXIDOREDUCTASE (LBO), encodes an oxidoreductase-like enzyme of the 2-oxoglutarate and Fe(II)-dependent dioxygenase superfamily. It is involved in the biosynthesis of strigolactones.	3	-4.05118	3.16352e-06	-3.34359	9.97821e-06	0.651391	0.837338	-2.106	0.000361368	-1.97801	0.000480975	-0.950462	0.582066	-1.61331	0.3901	1.23172	0.697259	1.55697	0.173529	1.06508	0.460059	-0.140103	0.845287	-1.05563	0.243901
	AT4G24670	Encodes a protein with similarity to the TAA1 trytophan aminotransferase involved in IAA biosynthesis. Double mutant analyses suggest that this protein is involved in regulating many aspects of plant growth and development from embryogenesis to flower formation and plays a role in ethylene-mediated signaling.TAR2 is required for reprogramming root architecture in response to low nitrogen conditio…	3	-3.90325	4.47743e-07	-4.0398	9.21338e-07	-2.65987	0.00252723	-5.01693	5.04746e-08	-3.87926	2.52538e-07	-2.68158	0.000776962	-1.10277	0.0352853	-0.120014	0.833812	-0.125096	0.835774	-0.0957756	0.900093	-1.46608	0.001594	-0.302758	0.451057
	AT1G74470	Encodes for a multifunctional protein with geranylgeranyl reductase activity shown to catalyze the reduction of prenylated geranylgeranyl-chlorophyll a to phytyl-chlorophyll a (chlorophyll a) and free geranylgeranyl pyrophosphate to phytyl pyrophosphate. The mRNA is cell-to-cell mobile.	3	-2.9189	0.0391901	-2.47682	0.0802722	-2.19941	1.93473e-05	-2.45823	0.109239	-2.08118	0.201251	-2.70447	4.93969e-08	-2.90907	8.46938e-08	-0.875946	0.0527495	-1.52587	0.000687433	-0.402194	0.389465	-1.49986	4.3786e-05	-0.770434	0.0222199
	AT1G68540	NAD(P)-binding Rossmann-fold superfamily protein;(source:Araport11)	3	-2.85902	0.000529999	-2.85255	0.00152998	-2.80926	0.0155987	-2.20061	0.00355838	-1.92684	0.00564925	-1.08346	2.16163e-05	-1.12791	3.22357e-05	-0.775911	0.331226	0.190948	0.825765	0.312773	0.758572	0.397993	0.0443462	0.313713	0.139733
	AT1G60600	Encodes a protein similar to 1,4-dihydroxy-2-naphthoic acid phytyltransferase involved in phylloquinone and plastoquinone biosynthesis. Mutants are pale green and heterotrophic with defects in photosynthetic electron transport.	3	-2.52939	2.71186e-07	-1.8419	9.19168e-06	-3.0648	2.67318e-05	-3.06464	2.77753e-08	-3.01183	4.74985e-08	-1.1366	3.17265e-06	-0.820594	0.000246431	-1.56816	0.000947024	-0.181763	0.60978	-0.0663688	0.886903	-0.961432	1.27668e-05	-0.494585	0.0118115
	AT3G09580	FAD/NAD(P)-binding oxidoreductase family protein;(source:Araport11)	3	-2.4826	1.874e-07	-2.95061	1.74946e-08	-2.39959	1.42092e-05	-3.39065	1.4785e-08	-3.02354	8.38654e-08	-1.95861	1.16406e-06	-1.4883	6.35645e-05	-1.03046	0.00822488	-0.573893	0.141197	0.303734	0.490693	-1.55095	1.13603e-05	-0.982755	0.00249818
	AT1G19440	Encodes KCS4, a member of the 3-ketoacyl-CoA synthase family involved in the biosynthesis of VLCFA (very long chain fatty acids).	4	-0.53973	0.032072	-0.331564	0.17505	-0.0307467	0.953211	0.046475	0.875707	-0.525494	0.045474	-0.161358	0.87865	0.316818	0.764466	-0.66484	0.220565	0.112812	0.814044	-0.00462525	0.994145	3.21514	0.000477698	2.70128	0.00413258
	AT5G47770	Encodes a protein with farnesyl diphosphate synthase activity.	4	-0.778858	0.000589741	-0.389379	0.0538928	-0.578199	0.0836199	-0.29483	0.182511	-0.338897	0.137111	0.478753	0.0619905	0.109266	0.719771	-0.73146	0.0504113	0.286572	0.448411	0.202566	0.666054	2.79516	3.66821e-10	1.29782	3.53051e-05
	AT5G16440	Encodes a protein with isopentenyl diphosphate:dimethylallyl diphosphate isomerase activity. There is genetic evidence that it functions in the mevalonate, but not the MEP biosynthetic pathway.	4	0.230142	0.355051	0.389006	0.102018	0.484959	0.0303668	0.496217	0.0446112	0.0781352	0.760862	0.0981617	0.667325	0.00701168	0.980004	-0.139832	0.617607	-0.274768	0.214881	-0.279832	0.286278	2.67298	4.59651e-11	1.10624	2.73779e-05
	AT5G07990	Required for flavonoid 3' hydroxylase activity. Enzyme abundance relative to CHS determines Quercetin/Kaempferol metabolite ratio. The mRNA is cell-to-cell mobile.	4	-0.662187	0.028985	-0.264886	0.381478	0.82962	0.387451	-1.69392	1.89878e-05	-1.27531	0.000359356	0.532858	0.0787768	0.10761	0.769486	1.07168	0.289247	0.512043	0.414816	0.355076	0.656718	2.41859	5.06129e-08	1.6958	1.24121e-05
	AT4G34350	Arabidopsis ISPH is involved in the plastid nonmevalonate pathway of isoprenoid biosynthesis. It was shown to complement the lethal phenotype of E. coli ispH mutant and is therefore most likely encodes a protein with 4-hydroxy-3-methylbut-2-en-1-yl diphosphate reductase activity involved in the last step of mevalonate-independent isopentenyl biosynthesis. Mutant has Albino seedling.	4	-1.03356	0.420936	-0.926892	0.464376	-0.745185	0.0033087	-0.666211	0.653159	-0.331416	0.841845	1.98025	0.00300737	1.63369	0.0172033	1.06219	0.000634516	-0.911047	0.000993988	-0.782176	0.00672679	3.55527	5.2815e-08	2.3801	2.43081e-05
	AT3G29670	Encodes a malonyltransferase that may play a role in phenolic xenobiotic detoxification. The mRNA is cell-to-cell mobile.	4	-1.36326	0.00752386	-0.975441	0.04673	-0.669294	0.199547	-1.26335	0.00358244	-0.810589	0.067133	1.34292	0.000779735	1.0004	0.0118349	0.52411	0.291723	-1.84446	1.78974e-05	-0.216512	0.566191	3.6153	3.50518e-09	2.68715	5.72001e-07
	AT1G64970	gamma-tocopherol methyltransferase (g-TMT) mRNA, nuclear; mutant has Deficient in alpha and beta tocopherol; Accumulates gamma tocopherol in leaves	4	-1.49434	0.000153351	-1.45803	0.000244897	0.964152	0.0408717	-1.73642	0.0109868	-1.05176	0.146997	-0.674824	0.193783	0.388484	0.419704	0.251477	0.677039	-2.23776	0.00420278	-0.919907	0.164545	0.98587	0.00684307	1.61721	0.000144592
	AT1G32100	Encodes a pinoresinol reductase involved in lignan biosynthesis. Expressed strongly in roots and less strongly in stems. Shows specificity for pinoresinol and not lariciresinol.	4	-1.67358	0.00660961	-2.0744	0.0038265	-2.10804	0.046521	-0.275538	0.607913	-0.157842	0.786785	-0.62091	0.226236	-0.583234	0.290094	-2.2049	0.068	-0.557328	0.460667	0.239597	0.783864	2.88878	3.9704e-06	1.4336	0.00772113
	AT1G20480	AMP-dependent synthetase and ligase family protein;(source:Araport11)	4	-1.20045	0.103244	-0.390546	0.576964	-3.08662	0.0909261	-1.74547	0.0416543	-0.95093	0.174421	-0.825343	0.0294156	-0.0437976	0.926845	-1.87199	0.245662	-0.441141	0.69237	-3.66438	0.0660355	2.01769	5.4639e-06	1.53545	0.000257157
	AT5G16410	HXXXD-type acyl-transferase family protein;(source:Araport11)	4	-2.26219	0.00121028	-2.58659	0.000921281	-3.4009	0.108181	-3.44777	0.0116252	-3.6267	0.0107197	1.19792	0.0127453	1.6557	0.00166324	1.40977	0.250361	-1.08942	0.0148761	-1.10201	0.0380997	4.62238	0.00232017	4.48594	0.00530305
	AT4G39330	cinnamyl alcohol dehydrogenase 9;(source:Araport11)	4	-2.92162	0.00323336	-2.50217	0.00963444	-3.14992	8.33094e-05	-5.07265	0.000737076	-3.79759	0.0100736	2.72624	3.87559e-07	2.12452	1.84123e-05	-0.693846	0.216995	-1.55167	0.00533972	-1.37258	0.0235731	2.396	4.69894e-07	1.58413	0.000159659
	AT3G51240	Encodes flavanone 3-hydroxylase that is coordinately expressed with chalcone synthase and chalcone isomerases. Regulates flavonoid biosynthesis. Not responsive to auxin or ethylene stimulus (qRT-PCR).	4	-0.191349	0.721716	0.359117	0.466069	-0.237775	0.844097	-4.84117	2.64623e-05	-4.24874	0.000123069	0.0334301	0.986485	0.709355	0.669114	1.74474	0.0529127	-3.08794	0.10228	-0.464806	0.792627	-1.63779	0.00186866	0.316737	0.566756
	AT2G45400	involved in the regulation of brassinosteroid metabolic pathway	4	-0.171681	0.802703	0.159666	0.816347	-2.90434	0.0166284	-3.42589	0.00053319	-3.59836	0.000486032	-1.92133	0.000182847	-1.57672	0.00102358	-1.5321	0.109632	-1.72505	0.0215845	-2.39099	0.0228745	-0.958692	0.0541616	-0.407272	0.395442
	AT5G55380	MBOAT (membrane bound O-acyl transferase) family protein;(source:Araport11)	1	-0.763451	0.120377	-0.786313	0.134684	-2.21295	0.0685835	-2.17036	1.86044e-05	-1.59911	0.000254981	0.710608	0.063659	0.263139	0.551802	-1.19676	0.277394	5.01879	0.0106167	4.57694	0.0355515	-0.875051	0.00546149	0.29028	0.373557
	AT1G28680	Catalyses trans-cis isomerization and lactonization in the biosynthesis of coumarins in roots.	1	1.63002	0.000129759	2.20489	9.36811e-06	0.711618	0.0638357	1.63659	0.00179571	1.41474	0.00523224	0.270187	0.511549	0.110454	0.821124	0.191999	0.69385	0.490044	0.195051	0.357033	0.437401	-2.01508	6.28773e-07	-0.315053	0.322885
	AT3G50210	2-oxoglutarate (2OG) and Fe(II)-dependent oxygenase superfamily protein;(source:Araport11)	1	1.04163	0.164693	0.264195	0.703806	0.88561	0.00755584	2.45794	2.03121e-05	2.11038	7.00245e-05	-1.29683	0.000320583	-0.620954	0.0612238	0.0388038	0.932683	0.512475	0.045915	-0.0521975	0.884646	-1.32217	0.000144401	-1.25614	0.00045226
	AT4G12300	member of CYP706A	1	1.1212	0.00789314	0.726936	0.0440084	0.324973	0.274193	1.03927	0.00562632	0.637659	0.0644822	-1.35125	5.60795e-05	-1.02671	0.00148505	0.414022	0.197228	-0.256021	0.30345	0.326227	0.239054	-0.700536	0.0124945	-0.293804	0.324955
	AT1G59960	NAD(P)-linked oxidoreductase superfamily protein;(source:Araport11)	1	-0.103368	0.670984	-0.328651	0.117359	1.17131	0.00340464	0.355085	0.0704919	0.724551	0.002429	-1.88026	0.17597	-1.5564	0.304105	0.780592	0.0642416	1.42229	0.000678781	0.479405	0.288216	-4.15873	4.66124e-05	-1.07784	0.0132167
	AT4G34540	Encodes a protein whose sequence is similar to pinoresinol-lariciresinol reductase from pine. Plays a positive role in developmental and dark -induced leaf senescence.	1	0.00934441	0.976863	0.287607	0.287641	0.370555	0.359899	0.197687	0.419912	0.473103	0.06685	-0.627041	0.0405553	-0.324682	0.314353	-0.525867	0.291723	-0.0940114	0.815391	-0.737066	0.126381	-1.91465	8.18895e-07	-1.0156	0.00136908
	AT1G78960	Encodes a multifunctional 2-3-oxidosqualene (OS)-triterpene cyclase that can cyclize OS into lupeol, alpha- and beta-amyrin.	1	0.101314	0.78855	0.240805	0.480634	0.072015	0.87459	-0.014095	0.963922	-0.226579	0.428376	-1.11634	0.205089	-0.675381	0.419868	-0.0716785	0.891894	-0.0064061	0.984152	0.023618	0.95373	-1.90026	0.000263938	-1.00113	0.0340699
	AT3G51970	acyl-CoA sterol acyl transferase 1;(source:Araport11)	1	1.02171	0.256902	1.24597	0.165465	-0.502821	0.696181	-0.464652	0.565763	0.104472	0.902044	-4.31727	1.73633e-06	-2.34423	0.000202519	0.50985	0.690521	-0.433747	0.680181	0.62946	0.556665	-0.741605	0.119235	-0.194409	0.731721
	AT5G57800	encodes a transmembrane protein with similarity to the sterol desaturase family at the N-terminus and to the short-chain dehydrogenase/reductase family at the C-terminus. Mutant analyses indicate this protein is involved in cuticle membrane and wax biosynthesis. The mRNA is cell-to-cell mobile.	1	-0.613674	0.404795	-0.679668	0.332654	-2.35888	0.00270852	-0.947956	0.175051	-0.621587	0.41753	-4.16319	3.20214e-08	-2.9753	1.49971e-07	0.241763	0.719978	-0.979991	0.0630618	0.069965	0.923763	0.496141	0.0576563	0.794137	0.00645795
	AT5G03260	LAC11 is a putative laccase, a member of laccase family of genes (17 members in Arabidopsis).	1	-2.33575	0.0038247	-0.173364	0.760251	-2.4479	0.0236379	0.301361	0.596224	-0.617279	0.232516	-1.02738	0.104116	-1.03853	0.10416	-1.82337	0.061708	0.934311	0.680107	0.703329	0.809171	0.274083	0.581525	-0.797042	0.183525
	AT5G60020	LAC17 appears to have laccase activity based on enzyme assays performed using lac17 mutants. Notably, these mutants appear to have a reduced deposition of G lignin units. LAC17 is expressed in interfascicular fibers and likely contributes to lignin biosynthesis, and hence, cell wall biosynthesis, there.	1	-2.28371	0.000863461	-1.41556	0.0150624	-2.4267	0.0439547	0.461927	0.380993	-0.389657	0.46205	-1.42022	0.00192641	-1.33891	0.00295332	-3.0128	0.0516124	-0.435538	0.674024	-0.132463	0.920398	-2.24045	3.91141e-07	-1.26512	0.000406916
	AT1G25450	Encodes KCS5, a member of the 3-ketoacyl-CoA synthase family involved in the biosynthesis of VLCFA (very long chain fatty acids).	1	-0.204987	0.825818	0.0953782	0.920845	-1.51765	0.0486776	0.165004	0.786013	0.0234447	0.973022	-1.24	0.000994493	-1.10467	0.00355225	-3.12881	0.0156047	0.0075549	0.989643	-0.103016	0.884184	-0.724109	0.0219733	-1.19893	0.00108506
	AT2G38080	LAC4 appears to have laccase activity based on enzyme assays performed using lac4 mutants. These mutants also have reduced levels of lignin. LAC4 is expressed in vascular bundles and fibers and likely contributes to lignin biosynthesis, and hence cell wall biosynthesis, there. lac4/irx12 mutants have a mild irregular xylem phenotype.	1	-1.2435	0.0005212	-0.373932	0.23693	-1.6624	0.011459	0.284094	0.332999	-0.305207	0.295242	-1.01359	0.00826354	-1.48474	0.000729358	-2.36305	0.00813685	-2.05786	0.00227516	-0.138814	0.820951	-0.163852	0.653381	-0.910547	0.0201236
	AT3G63410	Encodes a MPBQ/MSBQ methyltransferase located in the chloroplast inner envelope membrane. Mutant plants lack plastoquinone (PQ), suggesting that the APG1 protein is involved in the methylation step of PQ biosynthesis. The gene product is also involved in tocopherol (vitamin E) biosynthesis.	1	-1.75139	0.0325826	-1.09406	0.187599	-1.41972	2.00751e-06	-2.71561	0.00676993	-2.24837	0.0283046	-0.916723	0.184323	-0.236009	0.742956	-1.15636	5.58144e-05	-0.176736	0.390971	0.407751	0.0749873	-3.00021	0.000110562	-2.09726	0.000701033
	AT4G25700	Converts beta-carotene to zeaxanthin via cryptoxanthin.	1	-0.187043	0.563193	-0.310865	0.282427	-2.04048	0.00174279	-2.43144	7.30958e-06	-2.40648	1.17404e-05	-0.986599	0.00651753	-1.05609	0.0060152	-0.503325	0.274117	-1.92249	0.000327406	-0.89549	0.0499086	-2.59326	8.67857e-08	-1.1219	0.00292595
	AT5G63380	Encodes a peroxisomal protein involved in the activation of fatty acids through esterification with CoA. At5g63380 preferentially activates fatty acids with increased chain length (C9:0 to C8:0) and thus shares characteristics with long-chain fatty acyl-CoA synthases. Also able to catalyze the conversion of OPDA to its CoA ester and is therefore thought to be involved in the peroxisomal &#946;-ox…	1	-0.272996	0.262903	-0.34707	0.131234	-1.00015	0.00017931	-1.27829	4.73163e-05	-1.11832	0.00028964	-1.22552	0.121154	-2.02644	0.0354263	0.0175689	0.94735	0.0205379	0.930243	0.517425	0.0229435	-3.44057	1.54376e-08	-1.73385	1.81211e-05
	AT5G23230	nicotinamidase 2;(source:Araport11)	1	-0.480001	0.228299	-0.364543	0.362968	-0.62617	0.663646	-1.00734	0.0130604	-0.836851	0.0347236	-1.08124	5.10106e-05	-0.732216	0.00279802	1.63922	0.135711	0.387749	0.400186	0.621821	0.232178	-1.6479	5.66083e-08	-0.393638	0.0704664
	AT5G58490	NAD(P)-binding Rossmann-fold superfamily protein;(source:Araport11)	1	-1.00773	0.000448815	-0.799287	0.00276643	-0.67408	0.0690652	-0.727807	0.00659246	-0.545252	0.0442584	-0.59876	0.0290614	-1.11474	0.000538397	0.113582	0.799172	-0.398047	0.270287	0.347834	0.39749	-1.39895	1.47527e-05	-1.51648	1.09059e-05
	AT5G17230	Encodes phytoene synthase that is the rate-limiting enzyme in the carotenoid biosynthetic pathway and that interacts with the ORANGE (OR) protein. PSY's expression is posttransciptionally regulated by OR.	1	-2.01823	0.0221785	-2.09898	0.0157127	-0.790493	0.0118968	-1.29572	0.20499	-1.03721	0.342603	-2.30129	4.4498e-06	-2.02257	3.73248e-05	0.257575	0.471717	-0.0267305	0.941032	-0.259437	0.46999	-2.03101	6.89216e-06	-0.220721	0.588138
	AT2G16280	Encodes KCS9, a member of the 3-ketoacyl-CoA synthase family involved in the biosynthesis of VLCFA (very long chain fatty acids).	1	-1.29423	6.47126e-05	-1.22337	9.03593e-05	-1.32405	5.79952e-06	-1.44626	5.51807e-05	-1.26197	0.000349951	-1.7488	3.32459e-07	-1.2552	3.88279e-05	-0.292911	0.173674	-0.0232451	0.926289	-0.251897	0.330114	-0.846777	0.000627651	0.554201	0.0238599
	AT4G15560	Encodes a protein with 1-deoxyxylulose 5-phosphate synthase activity involved in the MEP pathway. It is essential for chloroplast development in Arabidopsis	1	-1.31381	0.264436	-1.39898	0.218291	-0.537351	0.0918116	-1.4407	0.229222	-1.24914	0.325016	-1.53397	0.0001008	-1.24969	0.00129336	0.539246	0.134061	-0.632605	0.0584143	0.173749	0.678003	-1.27715	0.00050325	-0.576898	0.105435
	AT3G10230	Encodes a protein with lycopene &#946;-cyclase activity. This enzyme uses the linear, symmetrical lycopene as substrate. However, unlike the &#949;-cyclase which adds only one ring, the &#946;-cyclase introduces a ring at both ends of lycopene to form the bicyclic &#946;-carotene.	1	-1.56141	2.99315e-05	-1.9733	1.27248e-06	-0.947044	0.000166702	-2.04633	5.24694e-06	-1.58043	0.000158809	-1.05204	0.000137839	-0.543944	0.0333333	0.124239	0.605975	-0.150972	0.461266	-0.323097	0.152859	-1.15731	3.15675e-05	-0.435117	0.0799527
	AT4G32770	Tocopherol cyclase involved in tocopherol (vitamin E)synthesis. VTE1 over-expressing plants have increased tocopherol indicating VTE1 is a major limiting factor in tocopherol synthesis. Mutants defective in this gene accumulate high amounts of zeaxanthin in conditions of high light or low temperature. Plays a role in the adaptation to low temperature stress, notably phloem loading.	1	-1.25428	0.00403652	-1.18336	0.00557346	-1.87865	0.000562766	-2.00218	0.016635	-1.80797	0.0358944	-0.515223	0.00529214	-0.527923	0.00691987	0.655666	0.0802727	-0.367801	0.535324	-0.854493	0.241787	-0.111667	0.523303	0.0266655	0.901887
	AT2G26930	Encodes a 4-(cytidine 5'-phospho)-2-C-methyl-D-erithritol kinase.	1	-1.61076	1.32981e-05	-1.06125	0.000900669	-1.32818	0.000298099	-2.16648	9.22936e-07	-1.95667	4.94593e-06	0.268828	0.236897	0.26371	0.281362	0.0641407	0.860885	0.0579722	0.864337	0.133692	0.728573	0.698488	0.00235682	0.422908	0.0683398
	AT5G57030	Lutein-deficient 2 (LUT2) required for lutein biosynthesis, member of the xanthophyll class of carotenoids. Encodes lycopene epsilon cyclase	1	-2.34557	0.00091723	-1.92069	0.00453954	-1.42055	0.00505946	-2.3111	0.0125666	-1.96421	0.0399253	-0.502826	0.00542918	-0.627769	0.00154901	-0.286865	0.581696	-0.10632	0.855264	0.225518	0.728882	0.89814	1.54368e-05	0.252304	0.162567
	AT2G20340	Encodes an aromatic aldehyde synthase (AtAAS), which catalyzes the in vitro conversion of phenylalanine and 3,4-dihydroxy-L-phenylalanine to phenylacetaldehyde and dopaldehyde, respectively. The mRNA is cell-to-cell mobile.	1	-1.62569	0.00293757	-1.42232	0.00733437	-1.45213	0.00349705	-2.70034	0.000414874	-2.27735	0.00259716	-1.13051	0.000470118	-0.913109	0.0037142	-0.405654	0.380892	0.417202	0.381177	-0.0154869	0.982259	-0.655152	0.0113376	-0.272704	0.319826
	AT2G02500	Encodes a protein with 4-Diphosphocytidyl-2C-methyl-D-erythritol synthase activity. The enzyme has an absolute requirement for divalent cations (Mg2+ reaches the highest catalytic activity).	1	-1.06567	0.0300577	-1.09329	0.0243379	-1.25397	0.0079066	-1.81898	0.000475391	-2.0059	0.000229818	-0.471389	0.0110779	-0.369846	0.0543954	-0.659861	0.133562	1.04589	0.0406432	0.582773	0.346212	-0.328318	0.0573499	-0.134206	0.488096
	AT1G68530	Encodes KCS6, a member of the 3-ketoacyl-CoA synthase family involved in the biosynthesis of VLCFA (very long chain fatty acids).	1	-1.16627	0.633699	-0.559242	0.83055	-1.23797	0.00011643	-2.27571	0.275667	-1.51113	0.524822	-1.07497	1.46132e-06	-0.689301	0.000427728	0.0269378	0.941788	0.0641095	0.848902	0.510856	0.131499	-0.206803	0.183229	0.299789	0.076228
	AT1G08470	Although this enzyme is predicted to encode a strictosidine synthase (SS), it lacks a conserved catalytic glutamate residue found in active SS enzymes and it is not expected to have SS activity.	1	-1.40201	0.000469276	-0.935678	0.0101743	-0.660398	0.067751	-1.27827	0.00154607	-1.30594	0.00160583	0.355654	0.135797	0.218703	0.406525	-1.47616	0.00295028	0.0154396	0.975368	-0.639793	0.238822	-0.617504	0.0092907	-0.173917	0.500833
	AT5G57590	Encodes a bifunctional enzyme with both dethiobiotin synthetase and diaminopelargonic acid aminotransferase activities that is involved in biotin synthesis.	1	-1.12121	0.0125083	-1.62979	0.00390917	-1.13247	0.107156	-2.20522	2.05241e-05	-1.21287	0.00148719	0.396233	0.479987	-0.394043	0.558784	-0.864193	0.22569	-0.850058	0.416198	-1.68616	0.228976	-0.686723	0.0950645	-0.209444	0.63281
	AT3G62000	S-adenosyl-L-methionine-dependent methyltransferases superfamily protein;(source:Araport11)	1	-1.53854	2.07983e-06	-1.3632	6.99715e-06	-1.29023	0.00712295	-1.72071	5.93116e-07	-1.03028	0.000303135	-0.242616	0.865108	0.411133	0.765144	-0.19201	0.657998	0.0377108	0.928451	0.1688	0.714742	-2.15468	0.00472491	0.00511726	0.994154
	AT5G49555	FAD/NAD(P)-binding oxidoreductase family protein;(source:Araport11)	1	-2.46386	1.3396e-06	-1.67553	7.66207e-05	-0.441814	0.173129	-2.31239	2.53045e-05	-1.88734	0.000339539	-0.39629	0.0381288	-0.00300624	0.989845	-0.634218	0.0789642	-1.20226	0.0049166	-0.172129	0.708963	-0.284657	0.109323	-0.130404	0.51435
	AT2G21860	violaxanthin de-epoxidase-like protein;(source:Araport11)	1	-2.25812	2.66553e-07	-1.71735	5.38993e-06	-1.68172	2.67954e-05	-2.6355	2.92279e-06	-1.90833	0.000208218	-1.02727	0.00044613	-0.670227	0.0140447	-0.911617	0.00577111	-0.463667	0.191295	-1.07214	0.0215587	-1.05465	6.49238e-05	-0.526426	0.0297506
	AT3G23490	Encodes a cyanase that catalyzes the bicarbonate-dependent breakdown of cyanate to ammonia and bicarbonate. CYN forms a hexadecamer and is believed to be a cytosolic protein. Long-term exposure to NaCl increases CYN transcript levels. It is also expressed at higher levels in flowers relative to stems, roots, and seedlings.	1	-1.10568	0.000477591	-0.846582	0.00401182	-0.298426	0.268328	-0.15782	0.615476	0.0830375	0.814958	0.099962	0.646645	-0.329205	0.129739	0.8127	0.00605938	1.35829	2.59157e-05	0.758829	0.00876323	0.312817	0.107526	0.316599	0.133016
	AT1G63970	Encodes a protein with 2C-methyl-D-erythritol 2,4-cyclodiphosphate synthase activity. The protein's activity was confirmed by heterologous expression of phenotypic complementation of the E. coli ispF mutant. Plants defective in this gene display an albino lethal phenotype.Homolog of E. coli IspF	1	-1.13319	0.00629057	-0.787495	0.0478765	-0.425515	0.0714701	-0.794214	0.0749192	-0.597816	0.202547	-0.436695	0.0152505	-0.492203	0.0106526	-0.668266	0.0136152	0.768026	0.00376225	0.786414	0.00700288	-0.0515504	0.775034	0.106257	0.582865
	AT1G67730	Encodes one of the two Arabidopsis homologues to YBR159w encoding a S. cerevisiae beta-ketoacyl reductase (KCR), which catalyzes the first reduction during VLCFA (very long chain fatty acids, >18 carbon) elongation: KCR1 (At1g67730), KCR2 (At1g24470). Complementation of the yeast ybr159Delta mutant demonstrated that the two KCR proteins are divergent and that only AtKCR1 can restore heterologous …	1	-0.0148668	0.961371	-0.319457	0.185602	-0.567425	0.0377547	-1.04312	0.000863399	-0.862701	0.00550016	-1.81209	3.09204e-06	-1.67234	1.5928e-05	-0.270905	0.357995	0.157765	0.545601	0.453144	0.109229	0.311108	0.26785	0.411904	0.171034
	AT4G36810	Encodes a protein with geranylgeranyl pyrophosphate synthase activity involved in isoprenoid biosynthesis. The enzyme appears to be targeted to the chloroplast in epidermal cells and guard cells of leaves, and in etioplasts in roots. The mRNA is cell-to-cell mobile.	1	0.0793067	0.916127	-0.184179	0.783117	-0.336534	0.126346	-0.280066	0.687451	-0.327162	0.651576	-2.29469	5.69773e-07	-1.53849	9.70555e-05	-0.829388	0.00203931	0.304923	0.183896	0.0013332	0.997265	-0.669045	0.0266607	-0.694235	0.0325117
	AT1G75280	isoflavone reductase, putative, identical to SP:P52577 Isoflavone reductase homolog P3 (EC 1.3.1.-) {Arabidopsis thaliana}; contains Pfam profile PF02716: isoflavone reductase. Involved in response to oxidative stress. The mRNA is cell-to-cell mobile.	1	-0.329827	0.314897	-0.790253	0.0110137	-1.55424	0.000648431	-1.55355	0.0105105	-1.33684	0.0317149	-2.27883	3.94145e-05	-1.40431	0.000987257	0.386468	0.323136	0.152071	0.778441	0.73858	0.174475	-0.571996	0.0626216	-0.577406	0.0789057
	AT2G26250	epidermis-specific, encodes KCS10, a putative 3-ketoacyl-CoA synthase. probably involved in the synthesis of long-chain lipids found in the cuticle.	1	-1.0039	0.00923458	-0.382286	0.320949	-1.6026	7.73527e-06	-1.29685	0.00240149	-0.691108	0.106967	-2.13776	6.98903e-09	-1.75596	2.10016e-07	-0.58452	0.0415663	-0.29279	0.271963	0.329391	0.281121	-1.01771	2.21609e-05	-0.632556	0.00443891
	AT1G76490	Encodes a 3-hydroxy-3-methylglutaryl coenzyme A reductase, which is involved in melavonate biosynthesis and performs the first committed step in isoprenoid biosynthesis. Expression is activated in dark in leaf tissue but not controlled by light in the root (confine The mRNA is cell-to-cell mobile.	1	-0.84494	0.613103	-0.608205	0.721303	-1.0885	0.000458487	-0.890346	0.52168	-0.753284	0.615117	-1.48214	1.74754e-06	-1.16372	4.72022e-05	-0.923684	0.00395461	-1.3254	0.000178377	-0.57702	0.0886826	0.880161	0.000234536	0.941456	0.000223893
	AT1G06820	Encodes carotenoid isomerase. Catalyzes the isomerization of poly-cis-carotenoids to all-trans-carotenoids. Together with PDS and ZDS, CRTiso is required to complete the synthesis of lycopene from phytoene.	1	-0.630652	0.005538	-0.646817	0.00360463	-0.7527	0.00282554	-0.948481	0.000540841	-0.880103	0.00144375	-0.592143	0.00149697	-0.627605	0.00153444	-0.212251	0.39984	-0.652001	0.0103991	-0.765489	0.0101954	-0.552617	0.00195877	-0.679306	0.000583247
	AT5G60600	Encodes a chloroplast-localized hydroxy-2-methyl-2-(E)-butenyl 4-diphosphate (HMBPP) synthase (HDS), catalyzes the formation of HMBPP from 2-C-methyl-D-erythrytol 2,4-cyclodiphosphate (MEcPP). The HDS enzyme controls the penultimate steps of the biosynthesis of IPP and dimethylallyl diphosphate (DMAPP) via the MEP pathway and may serve as a metabolic control point for SA-mediated disease resistan…	1	-0.913079	0.496678	-0.66653	0.624569	-0.325897	0.076295	-0.946802	0.456005	-0.706423	0.612406	-0.298367	0.162384	-0.385233	0.0912241	0.0448505	0.853651	-1.55733	1.29288e-07	-1.18709	7.73185e-06	-0.526826	0.0131177	-0.471595	0.0361116
	AT2G38040	encodes the carboxyltransferase alpha subunit of acetyl-CoA carboxylase, involved in de novo fatty acid biosynthesis	1	-0.966213	0.466786	-0.80996	0.539019	-1.08615	0.000123503	-0.529924	0.650307	-0.387171	0.761241	-0.180286	0.368404	-0.100007	0.663068	0.0260298	0.935967	-0.615263	0.0185121	-0.643828	0.0249611	-0.0575928	0.773746	-0.0622801	0.783205
	AT3G04870	Involved in the biosynthesis of carotenes and xanthophylls, reduces zeta-carotene to lycopene.	1	-1.63397	0.0149979	-1.46263	0.0264214	-0.915184	0.00109335	-0.855928	0.31079	-0.659409	0.47278	-0.216094	0.317767	-0.256217	0.267701	-0.278785	0.316998	-0.663893	0.011039	-0.197101	0.505026	-0.23314	0.256975	-0.144864	0.533868
	AT4G14210	Encodes phytoene desaturase (phytoene dehydrogenase), an enzyme that catalyzes the desaturation of phytoene to zeta-carotene during carotenoid biosynthesis. Processed protein is localized to the plastid.	1	-1.29005	0.00239537	-1.14222	0.00543273	-0.979044	6.82875e-05	-0.97063	0.0222833	-0.799504	0.067522	-0.577651	0.00801549	-0.545366	0.0168144	0.112564	0.625585	-0.218031	0.261631	-0.0360697	0.891922	-0.794229	0.000476089	-0.433624	0.0499477
	AT5G04620	The cDNA encoding 7-keto-8-aminopelargonic acid (KAPA) synthase, the first committed enzyme of the biotin synthesis pathway has been cloned and its molecular function confirmed (functional complementation of an E. coli mutant). The subcellular localization of the enzyme (cytosol) proves that the biotin biosynthesis in plants takes place in different compartments which differs from the biosyntheti…	1	-1.71546	0.000152173	-0.162545	0.652753	-1.36597	0.0697507	-1.23426	0.000992694	-1.02575	0.00427727	-1.21388	0.00608893	-0.623059	0.145051	-0.562929	0.423979	-0.158039	0.864229	-1.18548	0.307485	-0.237748	0.534969	0.0555919	0.905168
	AT3G11945	Encodes a protein involved in plastoquinone-9 biosynthesis. The enzyme possesses homogentisate prenyltransferase activity and was shown to use solanesyl diphosphate, farnesyl diphosphate and geranylgeranyldiphosphate as prenyl donors, but not phytyldiphosphate. This gene At3g11945 derives from a split of At3g11950, publications Tian et al (2007) and Sadre et al (2006) refer to this gene as At3g11…	1	-1.14781	0.00145041	-0.500692	0.140342	-0.418973	0.10465	-1.35964	0.00105955	-1.19827	0.00412797	-0.833184	0.000963123	-0.87282	0.00110534	-0.875902	0.00515246	-0.205055	0.51073	0.368842	0.272835	-0.732381	0.00234549	-0.250985	0.308649
	AT3G63520	Encodes a protein with 9-<i>cis</i>-epoxycarotenoid dioxygenase activity. The enzyme was shown to act on a variety of carotenoid including &#946;-carotene, lutein, zeaxanthin, and all-<i>trans</i>-violaxanthin. When those compounds are used as substrates, the major reaction product detected is a C14 dialdehyde: 4,9-dimethyldodeca-2,4,6,8,10-pentaene-1,12-dial. The enzyme did not cleave as efficie…	1	-1.39381	0.0737602	-0.887131	0.264077	-1.07922	3.38338e-05	-1.21863	0.132007	-0.817748	0.351055	-1.23443	2.10866e-06	-0.888094	0.000192247	-0.506565	0.0294995	-0.756188	0.0014644	-0.401124	0.0976809	-0.479096	0.0136748	0.0475037	0.837815
	AT1G57770	FAD/NAD(P)-binding oxidoreductase family protein;(source:Araport11)	1	-1.2454	0.000197578	-0.653163	0.0275072	-1.44305	0.000199421	-0.993425	0.00348093	-1.17911	0.000952741	-0.914919	0.00028096	-0.765737	0.00237758	-0.814778	0.016172	-0.271385	0.444665	-0.309343	0.460811	-0.858161	0.000393771	-0.529677	0.0250394
